# Supplementary material for: Factors associated with healthcare utilization among community-dwelling elderly in Shanghai, China
Source: PLoS One. 2018 Dec 3;13(12):e0207646. doi: 10.1371/journal.pone.0207646 (PMC6277110; doi:10.1371/journal.pone.0207646)
Supplement: S2 File — Database used for univariate analysis and logistic regression analysis of hospitalization. (XLSX) [file pone.0207646.s002.xlsx]

## Sheet: raw data
gender	age	marry	race	education	children	livingstatus	insurence	expension	income	location	self－rated health	sensory limitation	lonely	nervious	life feeling	ADL	changing	smoking	drink	hypertension	Diabetes	Heartdiseases	Cerebrovascular	Cataract	Bronchitis	Gastroenteritis	Regionaleconomiclevel	activity	Relatives gathering	community	Children meeting	Neighbor contact	free time job	treatment	Hospitalize01	number of chronic
#NULL!	2	3	#NULL!	1	3	3	3	1	2	3	2	1	1	1	1	1	2	3	4	1	0	0	0	0	0	0	3	1	2	4	1	1	2	0	0	1
1	4	3	1	2	3	2	1	3	1	3	1	1	1	1	1	1	2	1	1	0	1	0	0	0	1	0	3	1	3	4	1	4	2	0	0	2
2	5	3	1	2	4	1	2	1	1	2	2	1	2	1	2	1	3	1	2	1	0	0	0	0	0	0	1	2	1	4	1	1	2	0	0	1
2	5	3	1	2	3	2	2	3	1	1	2	1	1	1	1	1	4	1	1	1	0	1	0	1	1	0	2	2	1	4	1	1	2	1	1	4
2	5	3	1	1	3	2	5	2	1	1	3	1	2	1	2	1	3	1	1	0	0	1	1	0	0	0	2	2	3	4	1	1	2	1	1	2
1	5	3	1	2	3	1	1	3	1	1	2	1	2	1	1	1	3	4	4	0	0	0	0	0	0	0	2	1	1	4	1	1	2	0	0	0
1	5	3	1	1	3	2	3	1	4	3	3	1	1	1	3	1	3	4	4	0	0	0	0	0	0	0	3	1	3	1	1	1	2	0	0	0
1	5	3	1	3	3	3	1	3	1	1	1	1	1	1	1	1	2	2	2	0	0	0	0	0	0	0	2	2	2	3	1	1	2	0	0	0
1	5	3	1	1	3	2	1	2	1	1	2	1	1	1	1	1	2	1	1	0	0	0	0	0	1	0	2	2	4	4	3	1	2	0	0	1
2	5	1	1	1	4	2	2	3	1	1	3	1	1	1	1	2	3	1	1	1	1	1	0	0	1	0	1	2	4	3	1	1	2	0	1	4
2	5	1	1	3	2	3	1	3	1	1	2	1	2	1	2	1	2	1	1	1	0	1	0	0	0	0	1	2	3	4	2	4	2	0	0	3
1	5	1	1	2	2	2	1	3	1	1	2	1	1	1	1	1	3	1	4	1	0	1	0	0	0	0	2	2	1	4	2	1	2	0	1	2
1	5	1	1	3	2	2	2	1	1	2	2	1	1	1	2	1	2	1	1	0	0	0	0	0	0	0	1	2	3	4	1	1	2	0	0	0
2	4	3	1	1	2	2	2	1	1	2	2	1	1	1	1	1	3	1	1	1	1	0	0	0	0	0	1	1	1	3	1	1	2	0	1	2
2	4	3	1	1	3	1	1	3	1	1	1	1	1	1	1	1	3	3	1	0	0	0	0	0	0	0	2	1	4	4	2	1	2	0	0	0
2	4	3	1	1	3	2	1	2	1	1	1	1	1	1	2	1	2	1	1	1	0	0	1	0	0	0	2	1	3	4	1	1	2	1	0	2
2	4	3	1	1	3	1	3	1	1	3	1	1	1	1	1	1	3	1	1	1	0	0	0	0	0	0	3	1	3	4	1	1	2	1	0	1
2	4	3	1	1	2	2	2	1	1	2	2	1	2	2	2	1	2	1	1	1	0	0	0	0	0	0	1	1	1	3	5	1	2	0	0	1
1	4	3	1	1	3	1	1	3	1	3	2	1	1	1	1	1	2	1	2	1	0	1	1	0	1	0	3	1	3	4	2	1	2	0	1	4
2	4	1	1	2	3	2	1	3	1	1	2	1	1	1	1	1	1	1	1	1	1	1	0	0	0	0	2	1	4	3	2	1	2	0	0	3
2	4	1	1	1	3	1	#NULL!	1	1	3	2	1	1	1	1	1	2	1	1	0	0	0	0	0	0	0	3	1	2	4	1	1	2	0	0	0
1	4	#NULL!	1	2	3	3	1	3	1	1	2	1	1	1	1	1	2	1	1	0	0	0	0	0	0	0	2	1	1	4	1	1	1	1	1	1
2	3	3	1	1	3	2	2	1	1	3	1	1	1	1	1	1	2	1	1	0	0	0	0	0	0	0	3	1	3	4	2	1	1	0	1	0
1	3	3	1	2	2	3	2	1	1	3	2	1	2	2	2	1	3	1	2	0	0	1	0	0	1	0	3	1	3	4	1	1	2	0	1	2
1	3	3	1	2	3	3	2	1	1	2	1	1	1	1	1	1	2	2	1	1	1	1	0	0	0	0	1	1	1	4	1	1	2	0	0	4
2	3	1	1	2	3	3	1	2	1	1	2	1	1	1	1	1	2	1	1	1	1	1	0	0	0	0	1	2	3	4	1	1	2	0	0	3
2	2	3	1	2	3	2	3	1	1	2	1	1	1	1	1	1	1	1	1	0	0	0	0	0	0	0	1	1	2	2	3	2	1	0	0	1
2	2	3	1	3	2	3	3	1	1	3	1	1	1	1	1	1	2	1	1	1	0	0	0	0	0	0	3	1	2	1	4	1	1	0	0	1
2	2	3	1	2	2	3	2	1	1	2	1	1	1	1	1	1	2	1	1	1	0	1	0	0	0	0	1	1	1	2	1	1	1	0	0	2
2	2	3	1	1	2	1	2	2	1	1	2	1	1	1	2	1	2	1	1	1	0	1	0	0	0	0	1	1	3	1	1	1	2	1	0	3
2	2	3	1	2	2	2	3	1	#NULL!	3	2	1	1	1	1	1	3	1	1	0	0	1	1	0	0	0	3	1	3	4	4	1	2	0	0	4
2	2	3	1	3	2	1	1	2	1	1	2	1	1	1	2	1	2	1	1	0	1	0	0	0	0	0	2	2	3	3	1	1	1	0	0	2
2	2	3	1	2	2	3	1	1	1	2	1	1	1	1	1	1	1	1	1	1	0	0	0	0	0	0	1	1	1	1	2	1	1	0	0	1
1	2	3	1	2	3	3	1	3	1	2	2	1	1	1	1	1	3	1	1	1	0	1	1	1	0	0	1	1	3	2	3	2	1	0	1	4
1	2	1	1	1	3	3	3	1	3	3	2	1	1	1	1	1	2	3	4	0	0	0	0	0	0	0	3	1	2	2	1	1	2	0	0	1
2	1	3	1	3	2	2	1	3	1	1	1	1	1	1	1	1	4	1	1	1	0	1	0	0	0	0	1	1	2	1	1	1	2	0	1	2
2	1	3	1	2	2	3	3	1	1	3	1	1	1	1	2	1	2	1	1	0	0	0	0	0	1	0	3	1	3	4	3	1	2	1	0	1
2	1	3	1	3	2	2	1	3	1	1	2	1	1	1	1	1	2	1	1	0	0	0	0	0	0	0	2	1	4	4	1	1	2	0	0	0
2	1	3	1	3	2	1	1	2	1	1	2	1	2	1	2	1	2	3	2	1	0	0	0	0	0	0	1	2	4	4	1	1	2	0	0	1
1	1	3	1	2	2	3	2	1	1	2	2	1	1	1	1	1	2	1	1	0	0	1	0	0	0	0	1	2	3	4	1	1	2	0	1	1
1	1	3	1	2	3	2	3	1	4	3	3	1	2	1	3	1	2	4	1	0	0	0	0	0	0	0	3	2	3	1	3	1	2	1	0	1
1	1	3	1	2	2	1	2	3	1	1	2	1	1	1	1	1	3	3	1	1	0	0	0	0	0	0	1	2	1	4	1	1	2	0	0	2
1	1	3	1	3	2	2	1	3	1	1	2	1	1	1	1	1	3	1	1	0	0	0	0	0	0	0	2	1	3	4	1	1	2	0	0	0
1	1	1	1	1	2	2	3	1	1	3	3	1	2	2	3	1	2	4	4	1	0	0	1	0	0	1	3	1	4	4	5	1	1	0	1	4
1	1	#NULL!	1	3	2	1	1	2	1	1	2	1	1	1	1	1	2	1	2	1	0	0	0	0	0	0	2	1	1	4	1	1	2	1	0	1
1	1	#NULL!	1	4	1	2	1	3	1	1	1	1	2	2	2	1	3	1	1	0	0	0	0	0	0	0	2	1	4	4	3	1	2	0	0	0
2	5	3	1	1	4	1	1	2	1	1	3	1	3	2	2	1	3	1	1	1	1	0	0	1	0	0	2	2	4	4	2	1	2	1	0	3
2	5	3	1	1	3	2	2	1	1	2	3	1	3	3	3	1	3	1	1	0	0	1	1	0	0	1	1	2	1	4	1	1	2	1	1	4
2	5	3	1	4	3	3	2	3	1	1	2	1	1	1	1	1	2	1	1	1	0	0	0	0	0	0	2	2	3	4	3	1	2	0	1	1
2	5	3	1	1	3	2	3	1	2	3	2	1	1	1	2	1	2	1	1	1	0	0	0	0	0	0	3	2	4	4	1	1	2	0	0	1
2	5	3	1	4	3	2	5	3	1	1	2	1	1	1	1	1	3	1	1	1	0	1	0	0	0	0	2	2	2	3	1	1	2	0	0	2
2	5	3	2	1	3	2	1	3	1	1	2	1	1	1	1	1	2	1	1	1	1	1	0	1	0	0	2	2	3	4	1	1	2	0	0	4
2	5	3	1	1	2	2	2	1	1	2	3	1	2	1	2	1	2	1	1	0	0	1	1	1	0	0	1	1	4	4	5	1	2	0	1	3
2	5	3	1	2	3	2	1	3	1	1	2	1	1	1	1	1	3	1	1	1	1	1	0	0	0	0	2	1	1	4	1	1	2	0	0	3
1	5	3	1	2	4	2	5	3	1	3	2	1	1	1	1	1	3	4	4	1	0	0	1	0	1	1	3	1	2	4	2	1	2	0	1	4
1	5	3	1	2	3	2	2	1	1	2	1	1	1	1	2	1	2	1	1	1	0	1	0	0	0	0	1	2	3	4	1	2	2	0	1	3
1	5	3	1	2	2	2	2	1	1	2	1	1	2	2	1	1	2	4	4	0	0	0	0	1	0	0	1	2	1	4	1	1	2	0	1	1
1	5	3	1	1	4	1	1	3	1	2	1	1	1	1	1	1	3	4	4	1	0	0	0	0	0	0	1	1	3	4	1	1	2	0	0	1
1	5	3	1	1	4	2	2	1	4	3	1	1	1	1	1	1	2	1	4	0	0	0	0	0	0	0	3	1	1	1	1	1	2	0	0	0
1	5	3	1	2	3	3	2	1	1	2	3	1	1	1	3	1	3	3	1	0	0	0	0	0	0	1	1	2	3	4	1	1	2	1	0	2
1	5	3	1	1	3	2	2	1	1	2	2	1	1	1	2	1	2	1	1	0	0	1	0	0	1	0	1	2	3	4	1	1	2	1	0	2
1	5	3	1	1	3	2	1	2	1	2	1	1	1	1	2	1	3	1	1	0	0	1	0	0	0	0	1	1	1	3	1	1	2	0	0	1
1	5	3	1	3	3	2	1	3	1	2	2	1	1	1	1	1	2	2	1	1	0	1	0	0	0	0	1	2	1	4	1	1	2	0	0	3
1	5	3	1	2	3	3	1	3	1	2	3	1	1	1	1	1	2	1	1	1	0	0	1	0	1	0	1	1	3	4	1	1	2	0	0	4
1	5	3	1	2	3	2	1	3	1	1	2	1	2	2	2	1	2	1	1	1	0	0	0	0	0	0	1	2	2	4	2	1	2	0	0	2
1	5	3	1	3	3	1	5	3	1	1	3	1	1	1	2	1	3	3	3	0	1	0	0	0	1	0	2	2	2	2	2	1	2	0	0	3
1	5	3	1	2	3	2	2	2	1	3	1	1	1	1	1	1	2	1	1	0	1	0	0	0	0	0	3	1	3	4	1	1	2	0	0	1
1	5	3	1	4	3	2	1	3	1	3	2	1	1	1	1	1	3	3	4	0	0	1	0	0	0	0	3	1	3	4	4	1	2	1	0	1
1	5	3	1	2	3	3	2	2	1	1	2	1	1	1	2	1	3	4	2	0	0	0	0	1	0	1	1	2	4	3	3	1	1	0	0	3
1	5	3	1	1	2	3	#NULL!	1	4	3	1	1	1	1	1	1	2	3	4	1	0	0	0	0	0	0	3	2	3	1	3	1	2	0	0	1
1	5	2	1	1	4	2	1	2	1	1	1	1	1	1	1	1	2	1	1	0	1	0	0	0	0	0	2	1	1	3	1	1	2	0	0	1
1	5	2	1	3	3	3	1	3	1	1	2	1	1	1	1	1	2	4	1	0	0	0	0	0	0	0	2	2	1	4	2	1	2	0	0	0
2	5	1	1	3	3	3	2	3	1	1	3	1	1	1	2	1	3	1	1	0	0	1	1	0	0	0	2	2	4	3	1	1	2	0	1	3
2	5	1	1	1	3	1	2	1	1	2	2	1	1	1	2	1	2	1	1	1	1	0	1	1	0	0	1	2	1	4	1	1	2	1	1	4
2	5	1	1	1	4	1	2	1	1	2	1	1	2	1	1	1	2	1	1	0	0	0	0	0	0	0	1	1	3	4	1	1	2	0	0	1
2	5	1	1	1	4	2	2	1	1	2	2	1	1	1	2	1	3	1	1	1	0	0	0	1	0	0	1	1	2	4	1	1	2	1	0	2
2	5	1	1	3	4	3	5	2	1	1	2	1	3	3	2	1	3	1	1	0	0	0	0	0	0	0	2	2	4	4	2	1	2	0	0	0
2	5	1	1	1	4	2	5	2	1	1	1	1	1	1	1	1	2	1	1	0	0	0	0	0	0	0	2	2	4	4	1	1	2	0	0	2
2	5	1	1	2	4	2	2	3	1	1	2	1	3	2	2	1	2	1	1	1	0	1	0	0	0	0	2	2	4	4	2	1	2	0	0	2
2	5	1	1	1	3	2	5	3	1	1	1	1	1	2	2	1	4	1	1	1	0	1	0	0	0	1	2	1	1	4	1	1	2	1	0	3
2	5	1	1	3	3	1	5	3	1	1	3	1	1	1	2	1	3	1	1	0	0	1	0	0	0	0	2	2	4	4	2	4	2	0	0	2
2	5	1	1	2	2	2	2	3	1	1	3	1	1	1	1	1	3	1	1	0	0	0	0	0	0	0	2	#NULL!	3	4	2	1	2	0	1	1
2	5	1	1	2	4	2	3	1	1	3	1	1	1	1	2	1	2	1	1	1	0	1	0	0	0	0	3	1	3	4	1	1	2	0	0	2
2	5	1	1	1	4	2	2	1	1	2	1	1	1	1	1	1	2	1	1	1	0	1	1	0	0	0	1	1	1	4	1	1	2	0	0	3
2	5	1	1	2	3	2	1	2	1	2	2	1	1	1	1	1	2	1	1	0	0	0	0	0	0	0	1	2	3	4	1	1	2	0	0	0
2	5	1	1	1	3	1	1	3	1	1	1	1	2	1	1	1	3	1	1	1	0	1	0	0	0	0	2	2	4	4	1	1	2	0	0	3
2	5	1	1	3	3	2	1	3	1	1	2	1	3	3	2	1	1	1	1	0	1	0	0	0	0	0	2	1	4	4	2	1	2	0	0	1
2	5	1	1	1	2	2	1	3	1	1	2	1	1	1	1	1	1	1	1	0	1	0	0	0	0	0	2	2	4	3	1	1	2	0	0	1
2	5	1	1	1	3	2	1	3	1	1	2	1	1	1	1	1	3	1	1	0	0	0	0	0	0	0	2	1	1	4	1	1	2	0	0	0
1	5	1	1	3	4	1	5	3	1	1	1	1	1	1	2	1	2	1	3	0	0	0	0	0	1	0	2	2	4	4	1	1	2	0	1	1
1	5	1	1	1	3	2	3	1	1	2	1	1	1	1	2	1	2	1	1	1	0	0	0	0	0	0	1	2	3	4	1	1	2	0	1	1
1	5	1	1	2	4	2	5	2	1	2	2	1	1	1	1	1	2	4	4	0	0	0	0	0	0	0	1	2	2	4	2	1	2	1	0	1
1	5	1	1	1	3	2	3	1	3	3	1	1	1	1	1	1	3	3	4	0	0	0	1	0	0	0	3	1	4	4	2	1	2	0	1	2
1	5	1	1	3	3	3	1	3	1	2	2	1	1	1	1	1	3	1	1	0	0	0	0	0	0	0	1	1	4	4	4	4	2	1	0	2
1	5	1	1	3	3	2	5	2	1	1	1	1	1	1	2	1	2	1	1	0	1	0	0	0	0	0	2	1	4	4	1	4	2	0	0	1
1	5	1	1	2	3	3	1	3	1	2	1	1	1	1	1	1	2	3	1	0	0	0	0	0	0	0	1	1	4	4	1	1	2	0	0	0
1	5	1	1	2	3	2	2	1	4	3	1	1	1	1	1	1	2	1	1	0	0	0	0	0	0	0	3	1	3	1	1	1	2	0	0	0
1	5	1	1	2	3	2	1	3	1	1	2	1	1	1	1	1	2	1	1	1	0	0	1	0	0	0	2	1	4	4	1	1	2	0	0	2
1	5	1	1	1	4	3	5	3	1	1	3	1	2	2	2	1	3	1	1	0	0	1	0	0	0	0	2	2	4	4	3	4	2	0	0	1
2	4	3	1	1	3	1	3	1	3	3	3	1	2	2	2	1	3	1	1	0	0	1	1	0	0	0	3	2	3	4	3	1	2	0	1	2
2	4	3	1	1	3	2	3	1	1	2	1	1	1	1	1	1	2	1	1	0	0	0	0	0	0	0	1	2	4	4	1	1	2	0	1	0
2	4	3	1	1	4	2	2	1	1	2	2	1	1	2	2	1	3	1	1	1	1	0	1	0	0	0	1	1	1	4	2	1	2	1	1	3
2	4	3	1	1	4	1	3	1	1	2	2	1	1	1	1	1	2	1	1	1	1	1	0	0	0	0	1	1	2	4	1	1	2	0	0	3
2	4	3	1	1	3	2	3	1	1	3	1	1	1	1	1	1	2	1	1	0	0	1	0	0	0	0	3	2	1	4	1	1	2	0	1	1
2	4	3	1	2	3	2	1	2	1	1	3	1	1	1	1	1	2	1	1	1	1	0	0	0	0	0	2	1	4	2	3	2	1	0	1	3
2	4	3	1	1	3	2	2	1	4	3	2	1	1	1	1	1	1	1	1	1	0	0	0	0	0	0	3	1	3	1	1	1	2	0	1	1
2	4	3	1	1	3	3	2	1	1	2	2	1	2	1	2	1	3	1	1	1	0	0	1	0	0	0	1	1	4	4	1	1	2	0	1	2
2	4	3	1	1	3	2	2	1	1	2	2	1	2	1	2	1	2	1	1	0	0	0	0	0	0	0	1	2	4	1	1	1	2	0	0	0
2	4	3	1	3	3	2	1	3	1	1	1	1	1	1	1	1	3	1	1	0	0	0	0	0	0	0	2	1	2	2	3	1	2	0	0	0
2	4	3	1	1	3	1	1	2	1	1	2	1	2	1	2	1	2	3	1	0	0	0	0	0	0	0	2	2	4	4	2	1	2	0	0	0
2	4	3	1	2	2	3	2	1	1	2	2	1	1	1	1	1	2	1	1	1	1	1	0	1	0	0	1	2	1	4	1	1	2	0	1	4
2	4	3	1	1	3	2	2	1	1	2	1	1	1	1	1	1	2	1	1	1	1	0	0	0	0	0	1	1	1	3	2	1	2	0	0	2
2	4	3	1	1	3	1	2	2	1	1	2	1	1	1	2	1	3	1	1	1	1	1	0	0	0	0	1	2	2	3	3	1	1	0	0	4
2	4	3	1	3	4	1	1	3	1	1	1	1	2	2	2	1	2	1	1	1	0	0	0	0	0	0	1	1	1	1	2	1	2	0	0	1
2	4	3	1	1	3	2	2	1	1	2	1	1	1	1	1	1	2	1	1	0	0	0	0	0	0	0	1	2	1	4	3	1	2	0	0	1
2	4	3	1	1	3	3	2	1	1	2	1	1	1	1	1	1	4	1	1	0	0	0	0	0	0	0	1	1	1	4	2	1	2	0	0	1
2	4	3	1	1	2	3	2	1	1	2	3	1	1	2	2	1	3	1	1	1	0	1	0	0	0	0	1	2	3	4	1	1	2	1	0	3
2	4	3	1	1	2	1	2	1	1	2	1	1	1	1	1	1	2	1	1	0	0	0	0	0	0	0	1	1	1	4	1	1	2	0	0	0
2	4	3	1	2	3	3	3	1	4	3	1	1	1	1	2	1	2	1	1	0	0	0	0	0	0	0	3	1	3	1	1	1	2	0	0	0
2	4	3	1	1	3	2	1	2	1	1	1	1	1	1	1	1	2	1	1	0	0	0	0	0	0	0	2	2	4	4	1	1	2	0	0	0
2	4	3	1	3	3	3	2	1	2	2	1	1	2	2	3	1	2	1	1	0	0	0	0	1	0	0	1	1	1	4	2	1	2	0	0	2
2	4	3	1	1	3	2	2	1	1	2	1	1	1	1	2	1	2	1	1	1	0	1	0	0	0	0	1	2	3	4	1	1	2	0	0	2
2	4	3	1	1	2	3	3	1	4	3	2	1	1	1	3	1	2	1	1	0	0	0	0	0	0	0	3	1	3	1	1	1	2	1	0	0
1	4	3	1	2	4	2	3	1	1	2	2	1	1	1	1	1	2	1	1	1	0	1	0	0	0	0	1	1	2	4	1	1	2	0	0	3
1	4	3	1	1	3	3	1	3	1	1	2	1	1	1	1	1	3	3	1	0	0	0	0	0	0	0	2	1	1	1	2	1	1	0	1	1
1	4	3	1	2	3	3	5	2	1	3	1	1	1	1	1	1	2	3	4	0	0	0	0	0	0	0	3	2	3	4	4	1	2	0	0	0
1	4	3	1	2	3	3	5	3	1	1	1	1	1	1	1	1	2	1	4	1	0	0	0	0	0	0	2	2	3	4	2	1	2	0	0	1
1	4	3	1	4	3	3	1	3	1	1	2	1	2	1	1	1	2	3	4	0	0	0	0	0	1	0	2	2	3	3	2	1	2	1	0	1
1	4	3	1	1	3	2	1	3	1	1	2	1	1	1	3	1	3	1	1	1	1	1	0	0	0	0	2	1	3	4	5	1	2	0	0	3
1	4	3	1	2	3	2	1	3	1	2	2	1	2	2	2	1	2	1	1	1	0	1	0	0	0	0	1	2	1	4	1	1	2	0	0	2
1	4	3	1	1	4	1	2	1	1	2	2	1	1	1	2	1	2	1	1	1	0	0	0	0	0	0	1	1	1	4	1	1	2	0	0	2
1	4	3	1	2	3	3	1	2	1	1	2	1	1	1	1	1	2	3	1	1	0	0	0	0	0	0	2	1	4	3	2	1	2	0	0	1
1	4	3	1	2	3	2	3	1	2	3	2	1	1	1	2	1	2	2	1	1	1	1	0	0	0	0	3	2	4	4	2	1	2	0	0	3
1	4	3	1	3	3	1	1	3	1	1	2	1	2	2	2	1	3	4	4	0	0	0	0	0	0	0	2	2	1	4	1	1	#NULL!	0	0	0
1	4	3	1	3	2	2	1	3	1	1	2	1	2	2	2	1	2	1	3	1	0	0	0	0	0	0	2	2	3	4	4	1	2	0	0	1
1	4	3	1	1	2	2	1	3	1	1	1	1	1	1	1	1	2	4	1	0	0	0	0	0	0	0	2	2	4	4	1	1	2	0	0	0
1	4	3	1	3	2	3	1	3	1	2	2	1	1	1	2	1	2	1	1	1	1	0	0	0	0	0	1	2	3	4	1	1	2	0	0	2
1	4	3	1	1	2	3	3	1	4	3	2	1	1	1	3	1	2	3	4	0	0	0	0	0	0	1	3	1	3	1	1	1	2	1	0	1
2	4	1	1	1	3	3	3	1	1	3	3	1	1	1	1	1	3	1	1	0	0	0	0	0	0	0	3	1	3	1	1	1	2	0	1	0
2	4	1	1	1	3	3	2	1	1	2	1	1	1	1	1	1	2	1	1	1	0	0	0	0	0	0	1	1	4	4	1	1	2	1	1	2
2	4	1	1	2	3	1	1	2	1	1	1	1	1	1	1	1	2	1	1	1	1	0	0	0	0	0	2	1	1	4	2	1	2	0	1	2
2	4	1	1	1	3	2	1	3	3	1	1	1	1	1	1	1	3	1	1	1	0	1	0	0	0	0	2	1	4	4	1	1	2	0	0	2
2	4	1	2	1	3	2	2	1	1	2	2	1	1	1	1	1	2	1	1	1	0	0	0	0	0	0	1	1	3	4	1	1	2	0	0	3
2	4	1	1	2	3	1	#NULL!	1	2	3	2	1	2	2	2	1	2	1	4	0	0	0	0	0	0	0	3	2	3	4	1	1	2	0	0	0
2	4	1	1	1	4	2	1	2	1	1	1	1	1	1	1	1	2	1	1	0	0	0	0	0	0	0	2	2	4	2	1	1	2	0	0	0
2	4	1	1	3	3	2	1	3	1	1	2	1	1	1	1	1	3	1	1	1	0	0	0	0	0	0	2	1	4	4	1	2	1	0	0	1
2	4	1	1	2	3	2	1	2	1	1	2	1	1	1	1	1	3	2	1	1	0	1	0	0	0	0	2	1	2	3	1	1	2	1	0	2
2	4	1	1	1	3	1	3	1	1	3	1	1	1	1	2	1	2	1	1	0	0	0	0	0	0	0	3	1	4	4	1	4	2	0	0	0
2	4	1	1	2	3	2	2	1	1	2	2	1	2	2	1	1	2	1	1	0	1	0	0	0	0	0	1	2	3	4	3	1	2	0	0	1
2	4	1	1	1	3	1	1	2	1	1	2	1	1	1	2	1	2	1	1	0	0	0	0	0	0	1	2	1	3	4	1	1	2	0	0	1
2	4	1	1	2	3	2	2	1	1	2	1	1	1	1	1	1	2	1	1	1	0	0	0	0	0	0	1	2	3	4	1	1	2	0	0	1
2	4	1	1	2	3	1	3	1	1	3	3	1	1	1	2	1	2	1	1	0	0	1	0	0	0	0	3	2	3	4	2	1	2	0	0	1
2	4	1	1	2	2	2	2	2	1	1	1	1	1	1	1	1	2	1	1	1	0	1	0	0	0	1	2	1	4	1	1	1	2	0	0	3
2	4	1	1	2	2	2	1	2	1	1	2	1	1	1	1	1	3	1	1	0	0	1	0	1	0	0	2	1	4	4	3	4	2	1	0	3
2	4	1	1	2	4	3	2	2	1	1	1	1	1	1	1	1	2	1	1	0	0	0	0	0	0	0	1	2	4	2	2	2	2	0	0	0
1	4	1	1	1	2	3	2	1	1	3	1	1	2	1	2	1	2	3	1	1	0	0	0	0	0	0	3	2	3	4	4	1	2	0	0	1
1	4	1	1	3	2	3	5	3	1	3	2	1	2	2	2	1	2	1	2	1	1	0	1	0	0	0	3	1	4	4	2	1	2	1	0	3
2	3	3	1	2	3	2	1	2	1	2	2	1	1	1	2	1	1	1	1	1	1	1	0	0	0	0	1	2	4	4	1	1	2	1	1	4
2	3	3	1	4	2	2	2	2	#NULL!	1	3	1	3	3	3	2	3	1	1	1	1	0	1	0	0	0	2	2	4	4	3	3	2	1	1	4
2	3	3	1	2	3	2	3	1	1	2	1	1	2	2	1	1	2	1	1	1	0	0	0	0	0	0	1	1	1	1	1	1	2	0	0	1
2	3	3	1	1	3	2	3	1	1	2	3	1	1	1	1	1	2	1	1	1	1	1	1	0	0	0	1	1	1	1	1	1	2	0	0	4
2	3	3	1	1	3	3	2	1	1	2	1	1	1	1	1	1	2	1	1	1	1	0	0	1	0	0	1	1	1	4	1	1	2	1	0	3
2	3	3	1	1	3	2	2	1	1	2	1	1	1	1	1	1	2	1	1	1	0	0	0	0	0	0	1	2	1	3	2	1	2	0	0	2
2	3	3	1	4	2	2	1	3	1	1	2	1	2	2	2	1	3	1	1	1	0	0	0	0	0	0	2	1	2	4	1	3	2	0	1	2
2	3	3	1	1	3	3	1	3	1	1	1	1	1	1	2	1	3	1	1	1	1	0	0	0	0	0	2	1	1	3	1	1	1	0	0	4
2	3	3	1	2	3	3	3	1	2	3	3	1	1	1	3	1	3	1	1	1	0	1	0	0	0	0	3	1	3	4	1	1	2	1	0	2
2	3	3	1	1	3	3	3	1	1	3	1	1	1	1	1	1	3	1	1	1	0	1	0	0	0	0	3	1	1	4	1	1	2	0	0	2
2	3	3	1	1	3	3	3	1	1	3	1	1	1	1	1	1	2	1	1	0	0	0	0	0	0	0	3	2	3	4	1	4	2	0	0	0
2	3	3	1	1	3	2	3	1	1	3	1	1	1	1	1	1	2	1	1	0	0	0	0	0	0	0	3	1	2	4	1	1	2	0	0	0
2	3	3	1	2	3	2	3	1	1	3	1	1	1	1	1	1	3	1	1	1	0	0	1	0	1	0	3	1	1	4	2	1	2	1	0	4
2	3	3	1	2	2	2	2	1	1	3	2	1	1	1	1	1	2	1	1	0	0	0	0	0	0	0	3	2	3	4	2	1	2	0	0	0
2	3	3	1	2	2	2	2	1	1	2	2	1	1	1	1	1	3	1	1	1	0	1	0	1	0	1	1	2	1	4	1	1	2	0	0	4
2	3	3	1	2	2	2	3	1	3	3	1	1	1	1	1	1	2	1	1	0	0	0	0	0	0	0	3	2	2	4	1	1	2	0	0	0
2	3	3	1	2	3	3	1	2	1	1	2	1	2	1	2	1	2	1	1	1	0	0	0	0	0	0	2	2	2	4	1	1	2	0	0	2
1	3	3	1	2	3	3	3	1	1	3	1	1	1	1	2	1	2	1	2	0	0	0	0	0	0	0	3	1	4	2	2	1	1	1	1	0
1	3	3	1	4	3	1	5	3	1	2	1	1	1	1	1	1	2	3	4	1	0	1	1	0	1	0	1	1	1	1	1	1	1	0	0	4
1	3	3	1	2	3	3	1	3	1	3	1	1	1	1	1	1	2	3	1	1	0	0	0	0	0	0	3	1	3	3	1	4	2	0	0	1
1	3	3	1	3	2	3	1	2	1	1	2	1	1	1	1	1	2	1	1	0	0	0	0	0	0	0	2	1	2	4	4	1	2	0	1	1
1	3	3	1	2	3	2	5	3	1	2	1	1	1	1	1	1	3	3	4	0	0	0	0	0	0	0	1	1	1	4	1	1	2	0	0	0
1	3	3	1	3	3	2	1	3	1	3	1	1	1	1	1	1	2	1	1	0	0	0	0	0	0	0	3	1	2	4	1	1	2	0	0	1
1	3	3	1	2	3	1	2	3	1	3	2	1	1	1	1	1	2	3	4	0	0	0	0	0	0	0	3	2	3	4	3	2	2	0	0	0
1	3	3	1	2	3	2	3	1	1	3	1	1	1	1	1	1	3	1	1	1	0	0	1	0	1	0	3	1	1	4	2	1	2	0	0	3
1	3	3	1	2	2	1	2	1	1	2	2	1	1	1	2	1	3	1	1	0	0	0	0	0	0	0	1	2	3	4	1	1	2	0	0	0
1	3	3	1	2	3	3	2	1	1	2	2	1	1	1	1	1	2	1	1	1	0	0	0	0	1	1	1	2	1	4	1	1	2	0	0	4
1	3	3	1	3	2	2	2	3	1	1	1	1	1	1	1	1	2	1	3	0	1	0	0	0	0	0	2	2	2	4	3	1	2	0	0	1
1	3	3	1	3	2	2	2	2	1	1	1	1	3	1	1	1	2	3	1	0	0	0	0	0	0	0	2	1	4	4	4	1	2	0	0	0
1	3	3	1	4	2	2	1	3	1	2	2	1	1	1	1	1	2	4	4	0	1	0	0	0	0	0	1	1	1	4	1	1	2	0	0	3
1	3	3	1	1	3	3	2	1	1	2	1	1	1	1	1	1	1	1	1	1	1	0	0	1	0	0	1	1	1	4	2	1	2	0	0	3
1	3	3	1	4	3	2	1	3	1	1	2	1	2	2	2	1	2	2	1	1	0	0	0	0	0	0	1	2	1	2	2	1	2	0	0	1
1	3	3	1	3	2	2	1	2	1	1	2	1	1	1	2	1	2	3	2	0	0	0	0	0	0	0	2	2	3	3	1	1	2	0	0	1
2	3	1	1	1	3	3	2	1	1	2	2	1	2	2	2	1	2	1	1	1	1	0	0	0	0	0	1	1	1	3	1	1	2	1	1	2
2	3	1	1	3	3	1	5	1	1	2	2	1	1	1	2	1	2	1	1	0	0	0	0	0	0	0	1	1	4	1	2	1	1	0	0	0
2	3	1	1	1	3	3	3	1	#NULL!	3	3	1	3	3	1	1	1	1	1	1	0	1	0	0	0	0	3	1	4	4	2	1	2	0	0	4
1	3	1	1	1	3	2	2	1	1	2	2	1	2	2	2	1	1	2	1	0	0	0	0	0	0	0	1	2	3	4	1	2	2	0	1	0
1	3	1	1	3	3	3	1	3	1	1	1	1	1	1	1	1	3	4	4	1	0	1	0	0	0	0	2	2	4	4	1	1	2	1	0	2
2	2	3	1	1	3	3	2	1	1	2	1	1	1	1	2	1	2	1	2	0	1	1	0	0	0	0	1	1	3	4	1	1	2	0	0	3
2	2	3	1	1	2	2	2	1	1	2	1	1	1	2	2	1	2	1	1	1	0	0	0	0	0	0	1	2	3	4	1	1	2	0	0	1
2	2	3	1	2	3	3	2	1	1	3	1	1	1	1	1	1	2	1	1	0	0	0	0	0	0	0	3	1	2	1	4	1	2	0	0	0
2	2	3	1	3	2	3	2	3	1	1	2	1	1	1	1	1	2	1	1	0	1	0	0	0	0	0	2	1	3	1	2	1	2	0	0	1
2	2	3	1	3	2	3	1	3	1	1	1	1	1	1	1	1	3	1	1	0	0	0	0	0	0	0	2	1	3	3	2	1	1	0	0	0
2	2	3	1	2	2	2	1	2	1	1	3	1	1	1	2	1	3	1	2	1	1	0	0	1	0	0	2	2	2	4	2	1	2	0	0	4
2	2	3	1	2	2	2	1	2	1	2	1	1	1	1	1	1	2	1	1	1	0	0	0	0	0	0	1	1	1	4	1	1	2	0	0	1
1	2	3	1	2	2	1	3	1	1	2	2	1	1	1	1	1	2	1	2	1	0	0	0	0	0	0	1	1	4	4	2	1	2	0	1	1
1	2	3	1	2	3	3	2	1	1	2	1	1	1	1	1	1	2	3	1	0	0	0	0	0	0	0	1	1	3	2	2	1	2	0	0	0
1	2	3	1	3	2	2	1	3	2	3	1	1	1	1	2	1	2	3	4	0	0	0	0	0	0	0	3	1	3	2	2	1	1	0	0	0
1	2	3	1	2	3	3	3	1	4	3	3	1	1	1	3	1	3	1	1	0	0	0	0	0	0	0	3	1	3	1	1	1	1	0	0	0
1	2	3	1	2	2	3	5	1	1	2	2	1	1	2	1	1	3	1	1	0	0	1	0	0	0	0	1	1	2	4	1	1	2	1	0	3
1	2	3	1	3	2	2	5	3	1	1	2	1	1	1	2	1	2	1	3	1	1	0	0	0	0	0	2	1	2	2	1	1	2	0	0	2
1	2	3	1	3	2	1	1	3	1	1	3	1	1	1	2	1	3	1	1	0	0	1	0	0	0	0	2	2	2	1	2	1	1	1	0	1
1	2	3	1	3	2	1	1	3	1	1	1	1	1	1	1	1	2	1	3	0	0	0	0	0	0	0	2	1	2	4	2	1	2	0	0	0
1	2	3	1	2	2	1	3	1	4	3	1	1	1	1	2	1	1	4	4	0	0	0	0	0	0	0	3	1	3	1	1	1	2	1	0	0
1	2	2	1	1	3	2	1	2	1	3	2	1	1	1	1	1	2	1	1	1	0	0	0	0	0	0	3	1	3	1	1	1	2	0	0	1
2	2	1	1	3	3	2	5	2	1	1	2	1	1	1	2	1	2	1	1	0	0	0	0	0	0	0	2	1	3	3	1	1	2	0	0	0
2	2	1	1	2	2	3	1	2	1	1	2	1	3	3	2	1	3	1	1	0	1	1	0	0	1	0	2	1	1	4	3	1	2	0	0	3
2	2	1	1	1	2	2	2	1	1	2	3	1	3	1	2	1	3	1	1	0	0	0	0	0	0	1	1	1	4	4	1	1	2	0	0	1
1	2	1	1	1	3	2	3	1	4	3	2	1	2	2	2	1	2	3	4	1	0	0	0	0	0	0	3	2	3	1	1	1	1	0	1	1
2	1	3	1	1	2	3	2	1	1	2	3	1	1	1	3	1	3	1	1	0	0	0	0	0	0	1	1	1	4	4	1	1	2	1	1	1
2	1	3	1	2	2	2	2	1	1	2	2	1	1	1	2	1	3	1	1	1	0	0	0	0	0	0	1	2	2	2	1	1	2	1	1	3
2	1	3	1	1	3	1	2	2	1	2	2	1	1	1	1	1	2	1	1	1	0	0	0	0	0	0	1	1	3	4	1	1	2	0	0	1
2	1	3	1	2	2	2	2	1	1	2	1	1	1	2	2	1	2	1	1	1	0	1	0	0	0	0	1	2	3	4	1	1	2	0	0	2
2	1	3	1	2	2	2	2	1	1	2	3	1	1	1	3	2	3	1	1	1	1	1	1	0	0	0	1	2	3	4	1	1	2	1	0	4
2	1	3	1	2	3	2	2	1	1	2	2	1	1	1	1	1	2	1	1	1	0	0	0	0	0	0	1	2	3	4	1	2	2	0	0	1
2	1	3	1	3	2	3	1	2	1	1	2	1	1	1	2	1	3	1	1	0	0	0	0	0	0	1	2	1	2	1	2	1	1	1	0	1
2	1	3	1	3	2	3	1	2	1	1	3	1	2	1	3	1	3	1	1	0	0	0	0	0	0	1	2	2	1	1	2	1	2	1	0	3
2	1	3	1	2	2	2	3	1	4	3	1	1	1	1	1	1	2	1	1	0	0	0	0	0	0	0	3	1	3	1	1	1	1	0	0	0
2	1	3	1	2	2	1	3	1	1	3	1	1	1	1	3	1	2	1	1	1	0	0	0	0	0	0	3	2	3	4	1	4	2	0	0	2
2	1	3	1	3	2	2	1	2	1	1	2	1	1	1	1	1	3	1	1	0	0	0	0	0	0	0	2	1	1	4	3	1	2	1	0	1
2	1	3	1	3	2	1	2	2	1	1	2	1	1	1	1	1	1	1	1	1	0	0	0	0	0	0	1	1	3	4	1	1	2	0	0	1
2	1	3	1	4	2	2	1	3	1	1	1	1	1	1	2	1	3	1	1	1	0	0	0	0	0	0	1	1	2	1	3	2	1	1	0	1
2	1	3	1	1	2	3	2	1	1	2	2	1	1	1	2	1	2	1	1	1	1	0	0	0	0	0	1	1	3	4	1	2	2	0	0	2
2	1	3	1	3	2	2	2	1	1	2	1	1	1	1	2	1	3	3	4	1	0	0	0	0	0	0	1	1	4	4	1	1	2	0	0	1
2	1	3	1	3	2	2	1	3	1	1	2	1	1	1	1	1	3	1	1	1	0	0	0	0	0	0	2	1	3	#NULL!	1	1	2	0	0	1
1	1	3	1	2	4	3	2	1	1	2	2	1	1	1	1	1	2	1	1	0	0	1	0	0	0	0	1	2	3	4	1	2	2	0	0	1
1	1	3	1	2	3	2	5	2	1	2	2	1	1	1	1	1	3	1	1	0	0	0	1	0	0	0	1	2	3	4	2	1	1	0	0	1
1	1	3	1	3	3	3	2	1	1	2	1	1	1	1	1	1	2	3	1	1	0	0	0	0	0	0	1	2	3	4	1	1	2	0	0	1
1	1	3	1	4	2	3	5	3	#NULL!	1	3	1	1	1	1	1	3	1	1	0	0	1	0	0	0	1	2	2	2	4	1	1	2	1	1	4
1	1	3	1	2	3	2	2	2	1	2	1	1	2	2	2	1	3	4	4	1	1	1	0	0	0	0	1	1	1	4	2	1	2	1	0	4
1	1	3	1	2	2	2	2	1	1	2	1	1	1	1	1	1	2	1	1	0	0	0	0	0	0	0	1	2	1	4	1	1	2	0	0	0
1	1	3	1	3	2	1	2	3	1	1	1	1	1	1	1	1	2	3	4	1	0	0	0	0	0	0	2	2	2	4	1	2	2	0	0	1
1	1	3	1	1	2	3	2	1	1	2	2	1	1	1	2	1	3	3	1	0	0	0	0	0	0	0	1	2	2	3	1	1	2	0	0	1
1	1	3	1	1	2	1	1	3	1	1	1	1	2	2	2	1	3	4	3	0	0	0	0	0	0	0	2	1	4	2	1	1	2	0	0	0
1	1	3	1	3	2	2	1	3	1	1	1	1	1	1	1	1	2	1	4	1	0	0	0	0	0	0	2	1	2	2	1	1	2	0	0	1
1	1	3	1	3	2	2	1	2	1	1	2	1	1	1	1	1	2	1	4	0	0	0	0	0	0	0	1	1	3	4	1	2	2	0	0	1
1	1	3	1	2	2	2	2	1	4	3	1	1	1	1	2	1	2	4	1	0	0	0	0	0	0	0	3	2	3	1	1	1	2	1	0	1
1	1	3	1	2	2	2	2	1	3	2	1	1	1	1	1	1	2	1	1	0	0	0	0	0	0	0	1	1	2	3	1	1	1	0	0	0
1	1	3	1	2	2	1	1	3	1	2	2	1	2	2	2	1	2	2	1	0	0	1	0	0	1	0	1	2	1	4	1	1	2	0	0	2
1	1	3	1	4	2	3	1	2	1	1	1	1	1	1	1	1	3	1	1	0	0	0	0	0	0	0	2	1	3	1	2	1	2	0	0	0
1	1	3	1	4	2	1	1	3	1	1	1	1	1	1	2	1	3	3	1	1	0	0	0	1	0	1	1	1	2	1	3	1	1	1	0	4
1	1	1	1	3	2	3	3	1	1	3	1	1	2	1	2	1	3	3	4	1	1	1	1	1	0	1	3	2	3	4	4	1	2	1	0	4
1	#NULL!	3	1	2	3	3	2	3	1	1	2	1	1	1	2	1	2	1	1	1	1	0	0	0	0	0	1	1	3	4	1	1	2	0	0	2
1	5	3	1	3	4	2	5	1	1	2	1	1	1	1	2	1	2	3	1	1	0	0	0	1	0	0	1	1	1	3	1	1	2	1	1	3
1	5	3	1	2	3	3	2	1	1	3	2	1	1	1	2	1	2	1	1	1	0	0	0	0	0	0	3	2	3	4	2	4	2	0	0	1
2	5	#NULL!	1	2	1	2	1	3	1	2	1	1	1	1	1	1	1	1	1	1	0	0	0	0	0	0	1	2	3	4	#NULL!	1	2	0	0	1
2	4	3	1	2	3	2	3	1	3	3	2	1	2	1	1	1	3	1	1	1	0	0	1	0	0	0	3	2	3	4	3	2	2	1	0	2
1	4	3	1	2	3	3	5	3	1	3	1	1	2	1	2	1	2	1	2	0	0	0	0	0	1	0	3	2	3	#NULL!	2	1	2	0	0	1
1	4	3	1	3	2	3	1	#NULL!	1	3	1	1	1	1	1	1	2	1	2	0	0	0	0	0	0	0	3	1	3	2	1	1	1	0	0	0
2	4	1	1	3	3	2	5	2	1	1	1	1	1	1	1	1	2	1	1	1	0	1	0	0	0	0	2	2	3	4	1	1	2	0	1	2
2	4	1	1	1	3	2	2	1	1	2	1	1	1	1	1	1	1	1	1	1	0	1	1	0	0	0	1	2	3	4	1	1	2	0	1	3
2	4	1	1	1	4	#NULL!	2	1	1	2	1	1	2	2	1	1	3	1	1	0	0	0	0	0	0	0	1	2	3	4	1	1	2	0	0	0
2	4	1	1	1	4	3	1	2	1	1	1	1	2	1	2	1	3	1	1	1	0	0	0	1	0	0	2	1	3	4	1	1	2	0	0	2
2	3	3	1	2	2	3	2	1	#NULL!	3	2	1	2	1	2	1	2	1	1	1	1	0	1	0	0	1	3	2	3	4	3	1	2	0	1	4
1	3	3	1	2	4	2	3	1	1	2	3	1	2	2	3	2	2	4	1	1	0	0	1	0	0	0	1	2	1	4	1	1	2	0	1	2
1	3	3	1	2	3	3	2	3	1	3	1	1	1	1	1	1	2	1	4	0	1	0	0	0	0	0	3	2	4	4	2	3	2	1	0	1
2	3	1	1	1	2	2	3	1	1	3	1	1	1	1	1	1	1	1	1	1	1	1	0	0	1	0	3	2	3	3	1	1	1	0	1	4
2	3	1	1	1	3	2	1	2	1	1	1	1	1	1	1	1	1	1	1	1	0	1	0	0	0	0	2	2	3	4	1	1	2	0	0	2
1	3	1	1	3	3	3	1	3	1	1	1	1	2	1	1	1	3	1	4	1	0	0	0	1	0	0	2	1	3	4	2	1	2	0	0	2
2	2	3	1	1	3	2	2	1	1	2	1	1	1	1	1	1	2	1	1	1	0	0	0	0	0	0	1	2	3	4	1	1	2	0	0	1
2	2	3	1	3	2	1	2	1	1	2	2	1	1	1	1	1	2	1	1	1	0	0	0	0	0	0	1	2	3	4	1	1	2	0	0	1
2	2	3	1	2	2	3	2	1	1	2	2	1	1	1	1	1	2	1	1	1	0	0	0	0	0	0	1	2	3	1	1	1	1	0	0	1
2	2	3	1	3	2	3	2	2	1	1	1	1	1	1	1	1	2	1	1	0	0	0	0	0	0	0	1	2	1	4	1	1	2	0	0	0
2	2	3	1	3	2	2	1	2	1	2	2	1	1	1	2	1	2	1	1	1	0	0	0	0	0	0	1	1	2	2	3	1	1	1	0	1
1	2	3	1	3	4	2	5	2	1	2	2	1	1	2	3	1	3	3	4	0	0	0	0	0	0	0	1	1	3	1	1	1	1	0	0	0
1	2	3	1	4	2	2	1	3	1	1	2	1	1	1	1	1	2	1	1	0	0	0	0	0	0	0	2	1	3	4	1	1	1	0	0	1
1	2	3	1	3	2	2	2	1	1	2	2	1	1	1	1	1	2	1	1	1	0	0	0	0	0	0	1	2	3	1	1	1	1	1	0	2
2	2	1	1	1	2	3	2	1	1	2	1	1	3	1	2	1	2	1	1	1	0	0	0	0	0	0	1	2	3	4	1	1	2	0	1	2
2	2	1	1	2	3	1	2	1	1	2	3	1	1	1	1	1	2	1	1	1	0	0	0	0	0	0	1	2	3	4	1	1	2	0	1	1
2	2	1	1	2	3	1	1	2	1	1	3	1	2	2	2	1	3	1	1	0	0	0	0	0	0	0	2	2	2	4	1	1	2	0	0	1
2	2	1	1	1	3	2	3	1	1	2	1	1	1	1	1	1	2	1	1	0	1	0	0	0	0	0	1	2	1	4	1	1	2	0	0	2
2	2	1	1	1	3	2	1	2	1	1	2	1	2	1	2	1	3	3	4	0	0	1	0	0	0	1	2	2	4	4	2	1	1	0	0	2
1	2	1	1	2	3	2	3	1	3	3	2	1	1	1	1	1	1	1	1	1	0	0	0	0	0	0	3	1	1	2	1	1	2	0	0	2
2	1	3	1	3	2	2	2	3	1	1	2	1	1	1	1	1	1	1	1	1	0	0	0	0	0	0	2	2	3	3	1	1	2	0	1	1
2	1	3	1	3	2	2	3	1	#NULL!	3	3	1	2	2	1	1	3	1	1	1	0	0	0	0	1	0	3	2	3	3	4	1	2	0	1	4
2	1	3	1	2	2	3	3	1	2	3	3	1	1	1	2	1	4	1	1	1	0	0	0	0	0	0	3	2	3	4	1	1	2	0	0	1
2	1	3	2	2	2	3	2	1	1	3	1	1	1	1	1	1	2	1	1	1	0	0	0	0	0	0	3	1	3	4	1	1	1	0	0	1
2	1	3	1	3	2	3	2	2	1	2	1	1	1	1	1	1	2	1	4	0	0	0	0	0	0	0	1	2	1	3	1	1	1	0	0	0
2	1	3	1	3	2	3	2	2	1	2	1	1	1	1	1	1	2	1	1	0	0	0	0	0	0	0	1	2	3	4	1	1	2	0	0	0
2	1	3	1	2	2	3	2	2	1	2	2	1	2	2	3	1	2	1	1	1	0	0	0	0	0	0	1	2	3	4	2	1	2	0	0	1
2	1	3	1	2	2	3	2	1	1	3	1	1	1	1	1	1	2	1	1	1	0	0	0	0	0	0	3	1	3	4	1	1	1	0	0	1
2	1	3	1	2	2	3	2	2	1	2	1	1	1	1	1	1	2	1	1	1	0	0	0	0	0	0	1	1	3	3	1	1	2	0	0	1
2	1	3	1	3	2	2	1	3	1	1	2	1	1	1	2	1	2	1	1	1	0	0	0	0	0	0	2	2	2	3	1	1	2	1	0	1
2	1	3	1	2	2	2	2	2	1	2	1	1	1	1	1	1	2	1	1	1	0	0	0	0	0	0	1	1	2	3	1	1	1	1	0	2
2	1	3	1	3	2	2	1	2	1	1	2	1	1	1	2	1	2	1	1	0	0	0	0	0	0	0	2	2	3	4	1	1	#NULL!	0	0	0
2	1	3	1	2	2	2	2	1	1	3	2	1	1	1	2	1	2	1	1	1	0	0	0	0	0	0	3	1	3	4	3	1	2	0	0	1
2	1	3	1	3	2	2	1	2	1	1	1	1	1	1	2	1	3	1	1	0	0	0	0	0	0	0	2	1	3	4	1	1	2	0	0	0
1	1	3	1	2	2	2	2	1	1	3	1	1	1	1	1	1	2	4	1	0	1	0	0	0	0	0	3	1	3	1	4	1	2	0	1	1
1	1	3	1	3	2	2	1	3	1	1	3	1	1	1	2	1	1	3	1	1	0	0	0	0	0	0	2	2	1	3	1	1	2	0	1	2
1	1	3	1	3	2	3	2	2	1	2	1	1	1	1	1	1	2	1	1	0	0	0	0	0	0	0	1	2	3	4	1	1	1	0	0	0
1	1	3	1	3	2	3	2	1	1	3	1	1	1	1	1	1	2	3	1	1	0	0	0	0	0	0	3	1	3	3	1	1	1	0	0	1
1	1	3	1	3	2	2	1	3	1	1	2	1	1	1	2	1	2	3	2	0	0	0	0	0	0	0	2	2	1	4	1	1	2	0	0	0
1	1	3	1	3	2	1	1	3	1	1	1	1	1	1	1	1	3	2	2	1	1	1	0	0	0	0	2	1	1	4	1	1	2	0	0	4
1	1	3	1	3	2	2	1	3	1	1	1	1	1	1	1	1	3	1	1	0	0	0	0	0	0	0	2	1	4	3	2	4	2	0	0	0
1	1	3	1	2	2	2	2	1	1	3	1	1	1	1	1	1	2	3	2	0	0	0	0	0	0	0	3	1	1	4	2	1	1	0	0	1
1	1	3	1	3	2	2	1	2	1	1	2	1	1	1	2	1	3	3	4	0	0	0	0	0	0	1	2	2	3	4	1	1	2	1	0	1
1	1	3	1	3	2	3	2	3	1	1	2	1	1	1	1	1	1	1	1	1	0	0	0	0	0	0	2	2	3	3	1	1	2	0	0	1
1	1	3	1	3	2	2	1	3	1	1	1	1	1	1	2	1	2	3	4	0	0	0	0	0	0	0	2	2	2	4	1	2	2	0	0	1
1	1	1	1	2	2	3	2	1	1	3	3	1	1	1	1	1	3	1	1	0	1	0	0	0	0	0	3	1	3	4	3	1	2	1	0	1
1	5	1	1	2	3	2	2	1	1	3	#NULL!	1	1	1	1	1	#NULL!	4	4	1	0	0	0	0	0	0	3	1	3	1	1	1	2	0	0	2
1	3	3	1	2	3	1	2	1	1	3	3	1	1	1	1	1	#NULL!	4	4	0	0	0	0	1	0	0	3	1	3	4	1	1	2	1	1	2
2	2	3	1	1	2	1	2	1	1	3	3	1	1	1	1	1	2	1	1	0	0	0	0	0	0	0	3	1	3	2	1	1	#NULL!	0	0	1
2	5	3	1	1	4	1	2	1	2	2	3	1	2	2	2	1	3	1	1	1	0	0	0	0	0	0	1	2	3	4	1	1	2	0	0	2
2	5	3	1	1	3	3	2	1	1	2	2	1	2	1	1	1	3	1	1	1	0	1	0	1	0	0	1	2	1	4	1	1	2	0	1	3
2	5	3	1	1	4	2	2	1	2	2	1	1	1	1	2	1	2	1	1	1	0	1	0	0	0	0	1	1	2	4	1	1	2	1	0	3
2	5	3	1	3	3	2	5	3	1	1	2	1	1	1	2	1	2	1	1	0	0	1	0	1	1	0	2	2	2	2	2	1	2	0	1	4
2	5	3	1	2	4	2	2	1	1	2	1	1	3	3	1	1	3	1	1	1	0	0	0	0	0	0	1	1	4	4	1	1	2	0	0	2
2	5	3	1	1	2	1	2	1	1	2	1	1	1	1	1	1	2	1	1	0	0	1	0	0	0	0	1	1	3	4	1	1	2	0	1	1
2	5	3	1	1	4	2	2	1	3	2	3	1	3	3	2	2	3	1	1	0	0	0	0	0	0	0	1	2	4	4	2	1	2	0	0	1
2	5	3	1	2	3	2	2	1	2	2	2	1	2	2	2	1	1	1	1	1	0	1	0	1	0	1	1	2	1	4	1	1	2	0	0	4
2	5	3	1	2	2	2	2	1	1	2	2	1	1	1	2	1	2	1	1	0	0	0	0	0	0	0	1	2	3	4	1	1	2	1	0	2
2	5	3	1	1	3	2	2	1	1	2	1	1	1	1	1	1	3	1	1	1	0	0	0	0	0	0	1	2	2	4	1	1	2	0	0	1
2	5	3	1	4	2	3	2	3	1	1	2	1	1	1	2	1	3	1	1	1	0	0	0	0	0	0	1	1	3	4	2	1	2	0	0	2
2	5	3	1	3	2	3	1	2	1	1	2	1	2	2	2	2	3	1	1	1	0	1	0	0	0	0	1	2	3	4	3	1	2	0	0	4
1	5	3	1	3	4	3	1	3	1	1	2	1	1	1	1	1	3	1	1	0	0	0	0	1	1	0	2	1	4	4	2	1	2	0	1	3
1	5	3	1	2	4	3	2	1	2	2	2	1	1	1	1	1	2	1	3	0	0	0	0	0	0	0	1	2	2	4	1	1	2	0	0	1
1	5	3	1	2	2	1	2	1	1	2	2	1	1	1	2	1	3	4	2	1	0	0	0	0	1	0	1	2	1	3	5	1	2	0	1	2
1	5	3	1	2	4	3	1	3	1	2	1	1	3	3	1	1	3	1	1	0	0	0	0	0	0	0	1	1	3	4	1	1	2	0	0	1
1	5	3	1	3	3	2	1	3	1	2	2	1	2	2	2	1	2	1	1	1	0	1	1	0	0	0	1	1	4	4	3	1	2	0	0	3
1	5	3	1	1	2	3	2	1	1	2	2	1	1	1	1	1	2	4	4	1	0	0	0	0	0	0	1	2	1	4	1	1	2	0	0	2
1	5	3	1	3	2	1	1	2	1	2	1	1	1	1	1	1	2	1	3	0	0	0	0	1	0	0	1	1	3	2	1	1	2	0	0	1
1	5	3	1	1	4	2	1	3	1	2	3	1	2	2	2	2	3	1	1	0	0	1	0	0	0	0	1	2	4	4	2	1	2	0	0	2
1	5	3	1	3	2	1	1	3	1	1	1	1	1	1	1	1	2	4	2	0	0	0	0	0	0	0	2	1	1	3	2	1	2	0	0	0
1	5	3	1	2	3	2	1	2	1	1	2	1	1	1	2	1	2	4	4	1	0	0	0	0	0	0	1	2	3	4	3	1	2	1	0	1
2	5	1	1	1	4	3	2	3	1	1	2	1	2	2	2	2	3	1	1	0	0	1	0	0	0	0	2	2	3	4	3	1	2	0	1	2
2	5	1	1	1	4	3	1	3	1	1	2	1	3	3	3	1	3	1	1	1	1	1	0	1	0	0	2	2	4	4	1	1	2	0	1	4
2	5	1	1	1	4	2	2	1	1	2	1	1	3	1	1	1	3	1	1	1	0	1	0	0	0	0	1	1	4	4	2	1	2	0	1	2
2	5	1	1	2	3	2	2	1	1	2	2	1	2	2	2	1	2	1	1	1	0	1	0	1	0	0	1	2	1	4	1	1	2	0	1	3
2	5	1	1	1	4	3	3	1	1	2	1	1	1	1	1	1	2	1	1	1	0	0	0	0	0	0	1	1	4	4	1	1	2	0	0	1
2	5	1	1	1	4	2	2	1	1	2	2	1	2	2	1	1	2	1	1	1	1	1	0	0	0	0	1	2	1	4	1	1	2	0	1	4
2	5	1	1	1	4	1	2	1	1	2	3	1	2	1	2	1	1	1	1	0	0	0	0	0	0	0	1	2	3	4	1	1	2	0	0	0
2	5	1	1	1	3	2	3	1	3	3	2	1	1	1	2	1	3	1	1	0	0	0	0	0	0	0	3	1	3	4	3	1	2	0	1	0
2	5	1	1	1	3	2	2	1	2	2	2	1	2	2	3	1	2	1	1	1	0	1	0	0	0	0	1	2	3	4	2	1	2	0	1	3
2	5	1	1	1	3	1	3	1	1	2	1	1	1	1	1	1	2	1	1	1	0	0	0	0	0	0	1	1	4	4	1	1	2	0	0	1
2	5	1	1	1	3	2	1	3	1	1	3	1	1	2	1	1	2	1	1	0	0	0	0	0	0	0	2	1	4	4	1	2	2	0	0	0
2	5	1	1	3	3	1	5	3	1	1	1	1	1	1	1	1	2	1	1	0	0	0	0	0	0	0	2	2	2	2	1	1	2	0	0	0
2	5	1	1	1	3	3	2	1	1	2	1	1	1	1	2	1	3	1	1	1	0	0	0	0	0	0	1	2	1	1	1	1	1	0	0	3
2	5	1	1	1	2	3	3	1	1	3	2	1	3	1	2	1	2	1	1	1	1	1	1	1	1	1	3	2	4	4	1	1	2	0	0	4
2	5	1	1	1	2	3	2	1	1	2	1	1	2	1	2	1	2	1	1	1	0	1	0	0	0	0	1	2	1	4	1	1	2	0	0	3
1	5	1	1	2	4	3	2	3	1	1	2	1	1	1	1	1	3	1	1	0	0	0	0	0	0	0	2	1	2	1	1	1	1	1	1	0
1	5	1	1	2	4	2	2	3	1	1	2	1	1	1	1	1	2	1	4	0	0	0	0	1	0	0	2	1	3	3	2	1	2	0	0	1
1	5	1	1	1	3	3	1	3	1	1	1	1	1	1	1	1	2	1	1	0	0	0	0	0	0	0	2	2	4	4	1	2	2	0	0	0
2	4	3	1	2	3	3	3	1	3	3	3	1	1	1	1	1	2	1	1	0	0	0	0	0	1	0	3	2	3	4	4	1	2	0	1	1
2	4	3	1	1	3	3	2	1	1	2	2	1	2	2	1	1	2	1	1	1	0	0	0	0	0	1	1	1	1	4	1	1	2	0	1	3
2	4	3	1	4	4	2	2	1	2	2	2	1	1	1	2	1	4	1	1	0	0	0	0	0	0	0	1	2	4	4	1	1	2	0	0	2
2	4	3	1	1	3	2	3	1	1	3	3	1	1	1	2	1	2	1	1	0	0	1	0	0	0	0	3	1	3	1	1	1	2	1	1	2
2	4	3	1	1	4	3	3	1	4	3	3	1	3	3	3	1	3	1	1	0	0	1	0	0	0	0	3	1	3	1	3	1	2	0	0	2
2	4	3	1	3	3	2	2	3	1	1	1	1	1	1	2	1	3	1	1	1	1	1	0	0	0	0	1	2	4	4	2	1	2	1	1	4
2	4	3	1	2	3	3	4	3	1	1	3	1	1	1	2	1	2	1	1	1	1	0	0	0	0	0	2	2	4	4	4	1	2	0	0	2
2	4	3	1	2	3	3	3	1	1	3	2	1	1	1	2	1	3	1	1	1	0	0	0	0	0	0	3	1	3	4	1	4	2	0	0	1
2	4	3	1	1	3	2	2	1	2	2	2	1	1	1	3	1	4	1	1	1	0	0	0	1	0	0	1	1	3	4	2	1	2	0	0	2
2	4	3	1	2	3	2	5	3	1	1	2	1	1	1	2	1	3	1	1	1	1	0	0	1	0	0	2	2	1	1	1	1	2	1	0	3
2	4	3	1	1	3	1	2	1	1	2	1	1	1	1	1	1	3	1	1	1	0	0	0	1	0	0	1	2	1	4	1	1	2	0	0	3
2	4	3	1	4	2	2	5	3	1	1	2	1	1	1	2	1	2	1	1	1	0	0	0	1	0	0	2	2	4	4	2	1	2	0	1	2
2	4	3	1	1	2	2	3	1	3	1	1	1	1	1	1	1	2	1	1	1	0	0	0	0	0	0	2	2	3	1	4	1	1	0	0	1
2	4	3	1	3	3	1	1	2	1	1	1	1	2	1	1	1	2	1	1	0	0	0	0	0	0	0	2	2	3	4	2	1	2	0	0	1
2	4	3	1	3	2	2	5	2	1	1	2	1	1	1	1	1	2	1	1	1	0	1	0	0	0	0	2	1	3	2	2	1	2	0	0	2
2	4	3	1	1	3	2	2	1	1	2	1	1	1	1	2	1	4	1	1	1	0	0	0	0	0	0	1	2	4	4	1	1	2	0	0	2
2	4	3	1	1	3	2	1	2	1	1	1	1	1	1	2	1	2	1	1	0	1	0	0	0	0	0	2	1	4	4	3	1	2	0	0	1
2	4	3	1	3	3	2	1	2	1	1	2	1	1	1	2	1	2	1	2	0	0	0	0	0	0	0	2	1	1	4	1	1	2	0	0	1
2	4	3	1	3	2	2	2	2	1	1	2	1	1	1	1	1	2	1	1	0	0	0	0	0	0	0	2	1	2	1	2	1	1	0	0	1
2	4	3	1	#NULL!	#NULL!	2	1	2	1	1	2	1	1	1	1	1	2	1	1	1	1	0	0	0	0	0	2	1	3	1	2	1	2	1	0	2
2	4	3	1	4	2	3	2	3	#NULL!	1	1	1	1	1	1	1	3	1	1	0	0	0	0	0	1	0	2	2	2	2	1	2	2	0	0	4
2	4	3	1	2	2	1	1	2	1	1	2	1	1	1	2	1	1	1	1	1	1	1	0	0	0	0	1	2	1	1	2	1	2	0	0	3
2	4	3	1	3	3	2	1	3	1	1	2	1	1	1	1	1	2	1	1	0	0	0	0	0	0	1	2	1	3	1	1	1	2	0	0	4
2	4	3	1	3	2	3	1	3	1	1	1	1	1	1	1	1	2	1	1	0	1	0	0	0	0	0	2	1	1	3	1	1	2	0	0	2
2	4	3	1	2	2	2	3	1	4	3	3	1	1	1	2	1	1	1	1	1	0	0	0	1	0	1	3	1	3	1	1	1	2	1	0	4
2	4	3	1	3	2	2	1	3	1	1	1	1	1	1	1	1	2	1	1	1	0	0	0	0	0	0	2	1	3	1	2	1	2	1	0	1
1	4	3	1	3	3	3	5	3	1	1	2	1	1	1	1	1	3	1	1	0	0	0	1	0	0	0	2	2	2	4	2	4	2	0	1	1
1	4	3	1	3	3	1	5	3	1	1	3	1	2	2	1	1	3	1	1	1	0	1	0	0	0	0	2	2	2	1	4	1	2	0	1	2
1	4	3	1	1	4	2	2	1	1	2	3	1	1	1	2	1	3	4	4	1	0	0	1	0	0	0	1	2	2	4	2	1	2	0	1	2
1	4	3	1	3	3	2	2	2	1	2	2	1	1	1	2	1	2	4	2	1	1	0	1	0	0	0	1	2	4	4	1	1	2	0	1	3
1	4	3	1	2	3	2	5	3	1	1	3	1	1	1	2	1	3	2	1	1	0	1	1	0	0	0	1	2	3	4	2	2	2	0	1	3
1	4	3	1	3	3	2	5	3	3	1	2	1	1	1	1	1	3	1	4	1	0	0	0	1	0	0	2	2	3	4	2	1	2	0	0	3
1	4	3	1	3	3	3	4	3	1	3	1	1	1	1	2	1	2	3	4	1	0	0	0	0	0	0	3	1	1	3	2	1	2	0	0	1
1	4	3	1	3	3	3	1	2	1	3	1	1	1	1	2	1	2	2	1	0	0	0	0	0	0	0	3	1	3	4	1	1	2	0	0	0
1	4	3	1	2	3	2	2	2	1	2	2	1	1	2	3	1	2	3	3	1	0	0	0	0	0	0	1	2	1	4	1	1	2	0	0	1
1	4	3	1	3	3	2	2	1	1	2	1	1	1	1	1	1	2	4	1	1	0	0	0	0	1	0	1	1	3	3	2	1	2	0	0	2
1	4	3	1	2	3	3	3	1	3	3	1	1	1	1	1	1	2	1	1	0	0	0	0	0	0	0	3	2	4	4	1	4	2	0	0	0
1	4	3	1	1	3	2	1	2	1	2	1	1	1	1	1	1	2	1	1	0	0	0	0	0	0	0	1	2	1	4	1	1	2	0	0	1
1	4	3	1	1	3	2	1	3	1	1	3	1	1	1	1	2	3	1	1	1	0	0	0	0	0	0	2	2	4	4	2	4	2	0	0	4
1	4	3	1	1	3	3	1	3	1	1	1	1	2	1	1	1	2	3	2	0	0	0	0	0	0	0	2	2	3	4	2	3	2	0	0	0
1	4	3	1	2	3	2	1	3	1	1	1	1	1	1	2	1	3	3	4	0	0	0	0	0	0	0	2	1	3	2	2	1	1	1	0	1
1	4	3	1	3	3	3	2	3	1	1	2	1	1	1	2	1	2	1	2	1	0	0	0	0	1	0	1	1	1	1	2	1	2	0	0	3
1	4	3	1	4	3	2	2	3	1	1	1	1	1	1	1	1	2	3	4	1	0	0	0	1	0	0	2	2	4	4	1	1	2	0	0	2
2	4	2	1	1	4	3	2	1	1	2	3	1	2	2	2	1	3	1	1	1	0	1	0	0	0	0	1	2	3	4	2	1	2	1	1	2
2	4	2	1	1	4	3	2	1	1	2	1	1	1	1	1	1	3	1	1	0	0	0	0	0	0	0	1	1	1	4	1	1	2	0	0	0
2	4	2	1	3	3	1	2	3	1	1	3	1	2	2	2	2	3	3	1	1	0	0	1	0	1	0	1	2	1	4	1	1	2	0	1	4
2	4	2	1	3	#NULL!	3	2	2	1	1	2	1	2	1	2	1	3	1	1	0	0	0	0	0	0	0	2	1	4	4	#NULL!	2	2	0	0	0
2	4	1	1	3	3	2	5	3	1	1	2	1	2	1	2	1	2	1	1	0	0	1	0	0	0	0	2	2	3	4	3	1	2	0	1	2
2	4	1	1	1	3	3	2	1	1	2	3	1	2	2	3	1	3	1	1	1	0	1	0	0	0	0	1	2	3	4	1	1	2	1	1	3
2	4	1	1	1	4	2	2	1	2	2	2	1	1	1	2	1	4	1	1	1	0	1	0	0	0	0	1	2	4	4	1	1	2	0	0	2
2	4	1	1	2	3	3	2	2	1	1	3	1	2	2	2	1	3	1	1	0	1	0	0	0	0	0	2	1	2	4	1	1	2	0	1	3
2	4	1	1	2	4	2	2	2	1	1	2	1	2	2	1	1	2	1	1	1	0	0	0	0	0	0	2	1	4	4	2	1	2	1	0	2
2	4	1	1	1	3	2	2	1	3	2	2	1	2	2	2	1	2	1	1	0	0	0	0	0	0	0	1	2	4	1	1	1	2	0	0	1
2	4	1	1	1	3	2	3	1	1	2	2	1	3	1	2	1	3	1	1	1	0	0	0	0	0	0	1	2	2	4	1	1	2	0	0	2
2	4	1	1	1	4	2	1	2	1	1	2	1	1	1	2	1	3	4	4	1	1	0	0	0	1	0	2	2	3	3	1	1	1	1	0	4
2	4	1	1	2	3	2	1	3	1	1	2	1	2	1	1	1	3	1	1	1	1	1	0	0	0	0	2	1	1	4	1	1	2	0	0	3
2	4	1	1	1	2	3	2	3	1	1	2	1	1	1	1	1	3	1	1	0	0	0	0	0	0	0	2	1	4	4	1	1	2	0	0	0
1	4	1	1	2	3	2	#NULL!	1	4	3	1	1	2	2	1	1	2	1	1	0	0	0	0	1	0	0	3	2	3	1	1	1	2	0	0	1
1	4	1	1	2	3	3	2	3	1	1	2	1	1	1	3	1	1	4	4	1	0	0	1	0	1	0	1	2	4	4	1	4	2	0	0	4
1	4	1	1	3	2	2	1	3	1	1	3	1	3	3	3	1	3	2	1	0	0	1	0	0	0	0	2	2	4	4	3	4	2	1	0	2
2	3	3	1	2	2	2	5	3	1	1	3	1	1	1	2	1	2	1	1	1	1	0	1	0	0	0	2	2	2	2	3	1	2	0	1	3
2	3	3	1	1	3	2	2	1	1	2	1	1	1	1	2	1	2	1	1	0	0	0	0	0	0	0	1	2	3	4	1	1	2	0	1	0
2	3	3	1	2	3	2	2	2	1	1	2	1	1	1	1	1	2	1	1	1	0	1	0	0	0	0	2	1	3	1	2	1	2	0	1	2
2	3	3	1	1	3	2	2	1	3	2	2	1	2	2	2	1	4	1	1	1	0	0	0	0	0	0	1	2	3	4	1	1	2	0	0	1
2	3	3	1	3	3	2	1	3	2	2	1	1	1	1	1	1	2	1	1	1	0	1	0	0	0	0	1	1	2	3	1	1	2	0	0	3
2	3	3	1	1	3	3	2	1	2	2	3	1	2	2	2	1	2	1	1	0	1	1	0	1	0	1	1	2	3	4	4	1	2	1	0	4
2	3	3	1	1	2	#NULL!	2	1	2	3	2	1	1	1	1	1	3	1	1	1	1	0	0	0	0	0	3	2	3	4	1	4	2	0	0	3
2	3	3	1	1	3	1	3	1	1	2	1	1	1	1	1	1	2	1	1	0	0	0	0	0	0	0	1	1	3	3	2	1	2	0	0	0
2	3	3	1	3	3	1	2	2	1	1	2	1	2	2	2	1	3	1	1	0	0	0	1	1	0	0	1	1	4	4	3	4	2	1	0	2
2	3	3	1	3	2	3	1	2	1	2	2	1	1	1	1	1	3	1	1	1	0	1	0	0	0	0	1	1	3	4	3	1	2	0	0	3
2	3	3	1	2	3	2	2	1	2	2	1	1	1	1	2	1	2	1	1	0	0	1	0	0	0	0	1	2	3	4	2	1	2	1	0	1
2	3	3	1	1	2	2	2	1	1	3	3	1	1	1	1	1	3	1	1	0	0	0	0	0	0	0	3	1	3	1	1	1	2	0	0	1
2	3	3	1	3	2	2	2	3	1	1	2	1	1	1	1	1	2	1	1	1	0	0	0	1	0	0	1	1	3	1	1	1	2	0	0	2
1	3	3	1	1	2	3	2	1	2	2	2	1	1	1	3	1	1	1	1	1	0	0	1	0	0	0	1	2	4	4	2	1	2	0	1	2
1	3	3	1	1	3	3	2	1	1	3	1	1	1	1	1	1	2	1	1	0	0	0	0	0	0	0	3	1	3	1	1	1	1	0	1	1
1	3	3	1	3	3	2	2	1	1	2	3	1	2	1	2	1	3	4	4	1	1	1	1	0	0	0	1	2	4	4	1	1	2	1	1	4
1	3	3	1	3	3	3	3	1	2	3	2	1	1	2	1	1	3	3	4	1	0	1	0	0	0	0	3	2	3	4	2	1	1	0	0	2
1	3	3	1	1	2	2	2	1	4	3	3	1	1	1	1	1	2	1	1	0	0	1	0	0	0	0	3	1	3	1	1	1	2	1	1	3
1	3	3	1	2	3	3	3	1	1	2	1	1	1	1	1	1	2	1	1	1	0	0	0	0	0	0	1	1	3	3	2	1	2	0	0	1
1	3	3	1	3	3	2	5	3	1	2	1	1	1	1	1	1	1	1	1	0	0	0	0	0	0	0	1	1	3	2	1	1	2	0	0	1
1	3	3	1	1	3	3	2	1	1	2	2	1	2	2	1	1	4	1	1	0	1	0	0	0	0	1	1	1	1	4	1	1	2	0	0	3
1	3	3	1	3	3	3	1	3	1	2	1	1	1	1	1	1	2	4	4	0	0	0	0	0	0	0	1	1	2	1	1	1	1	0	0	0
1	3	3	1	3	3	#NULL!	1	3	1	1	1	1	1	1	2	1	2	4	1	0	0	0	0	0	0	0	2	2	2	4	2	1	2	0	0	0
1	3	3	1	2	2	2	2	1	2	2	2	1	1	1	2	1	2	3	1	1	1	0	0	0	0	0	1	2	3	4	1	1	2	0	0	2
1	3	3	1	2	3	#NULL!	2	1	4	3	3	1	1	1	2	1	3	3	1	0	0	0	0	0	0	0	3	1	3	1	1	1	2	1	0	1
1	3	3	1	1	2	3	2	1	2	2	2	1	1	1	2	1	1	4	1	0	0	0	0	0	0	0	1	2	4	4	1	1	2	0	0	1
1	3	3	1	2	3	2	2	1	2	2	2	1	1	1	2	1	2	3	1	1	0	1	0	0	0	0	1	1	1	4	1	1	2	0	0	3
1	3	3	1	3	3	2	1	2	1	1	2	1	3	3	1	1	3	1	3	0	0	0	0	0	0	0	2	1	4	4	4	4	2	0	0	0
1	3	3	1	3	3	1	2	1	2	2	1	1	1	1	2	1	2	3	2	1	0	0	0	0	0	0	1	2	4	4	2	1	2	0	0	1
1	3	3	1	1	3	2	2	1	1	2	1	1	1	1	1	1	2	1	1	1	1	0	0	0	0	0	1	2	1	4	1	1	2	0	0	2
1	3	3	1	2	3	1	2	1	1	2	3	1	1	1	1	1	3	4	4	1	1	0	0	0	0	0	1	1	2	4	2	1	2	0	0	2
1	3	3	1	3	2	3	2	3	1	1	1	1	1	1	1	1	2	1	4	1	0	0	0	1	0	0	2	1	2	4	3	1	2	0	0	2
1	3	3	1	4	2	2	2	3	#NULL!	1	3	1	3	3	3	1	3	3	1	1	1	1	0	0	0	0	2	2	4	4	3	3	2	0	0	4
1	3	3	1	4	2	3	2	3	1	1	2	1	1	1	1	1	4	3	4	1	0	0	1	0	0	0	1	1	3	4	1	1	2	0	0	2
1	3	3	1	1	2	3	2	1	1	3	3	1	1	1	2	1	3	1	1	1	0	1	0	0	1	0	3	1	3	1	1	1	2	1	0	4
1	3	3	1	2	2	1	2	1	2	2	3	1	2	1	2	1	3	4	4	0	1	1	0	0	0	0	1	1	3	4	1	1	2	0	0	2
1	3	3	1	2	2	2	2	1	2	2	2	1	1	1	2	1	2	3	1	1	1	0	0	0	0	0	1	1	3	4	1	1	2	0	0	2
1	3	3	1	4	2	2	1	3	1	1	2	1	1	1	1	1	2	3	2	0	0	0	0	0	0	0	2	1	4	4	1	1	1	0	0	0
2	3	1	1	1	3	2	3	1	1	2	2	1	1	1	1	1	1	1	1	1	0	1	0	0	0	0	1	1	4	4	1	1	2	0	1	2
2	3	1	1	2	3	1	2	1	1	2	1	1	1	1	1	1	2	1	1	0	0	0	0	0	0	0	1	2	1	4	3	1	2	0	1	0
2	3	1	1	1	3	1	1	2	1	3	2	1	3	1	1	1	3	1	1	1	0	0	0	0	0	0	3	1	3	4	1	1	2	0	1	1
2	3	1	1	3	2	3	5	2	1	1	2	1	1	1	2	1	3	1	1	0	0	0	0	0	0	0	2	1	4	4	2	1	2	1	1	0
2	3	1	1	3	2	2	2	2	1	1	2	1	2	2	2	1	3	1	1	1	1	0	0	0	1	0	2	1	3	1	1	1	1	1	1	4
2	3	1	2	1	3	1	5	2	1	1	3	1	1	1	1	1	3	1	1	1	1	1	0	0	0	0	2	1	4	4	1	1	2	0	0	3
2	3	1	1	3	3	2	5	3	1	1	2	1	2	2	2	1	3	1	1	1	0	1	0	0	0	0	2	1	3	3	3	1	2	0	0	3
2	3	1	1	1	3	1	2	1	2	2	1	1	3	2	2	1	2	1	1	1	1	1	0	0	0	0	1	2	3	4	3	1	2	0	0	4
2	3	1	1	3	2	3	2	2	1	1	2	1	1	1	1	1	2	3	1	0	0	0	0	0	0	0	2	1	4	2	2	1	1	0	0	0
2	3	1	1	3	2	2	1	2	1	2	2	1	1	1	2	1	3	1	1	0	0	1	0	0	0	0	1	2	3	4	1	1	2	1	0	2
2	3	1	1	1	2	3	1	2	3	1	1	1	1	1	1	1	2	1	1	0	0	0	0	1	0	0	2	2	2	2	1	1	2	0	0	2
2	3	#NULL!	1	3	2	3	2	3	1	1	2	1	2	1	1	1	3	1	1	1	0	0	0	1	0	0	2	1	1	4	2	1	2	1	1	3
2	2	3	1	1	3	1	1	2	1	1	3	1	2	1	1	1	1	4	1	0	0	1	0	0	0	0	2	2	3	4	2	3	2	0	1	2
2	2	3	1	2	3	3	2	1	1	2	2	1	1	1	2	1	1	1	1	1	1	0	0	0	0	1	1	2	1	4	1	1	2	1	1	3
2	2	3	1	2	2	2	3	1	2	3	2	1	1	2	2	1	2	1	1	0	0	0	1	0	0	1	3	2	2	4	3	1	2	0	1	3
2	2	3	1	3	3	3	3	1	1	3	1	1	1	1	1	1	2	1	1	1	0	1	0	0	0	0	3	1	3	3	1	1	2	0	0	2
2	2	3	1	3	2	3	1	2	1	1	2	1	1	1	1	1	3	1	1	1	1	0	0	0	0	0	2	2	1	3	3	1	1	0	1	2
2	2	3	1	3	3	2	2	1	1	2	2	1	1	1	1	1	2	1	1	0	0	0	0	0	0	0	1	2	3	4	1	4	2	0	0	1
2	2	3	1	1	3	1	2	1	1	2	2	1	3	3	1	1	4	1	1	1	1	0	0	0	0	0	1	1	1	4	1	1	2	0	0	3
2	2	3	1	2	3	3	2	1	2	2	1	1	1	1	2	1	2	1	1	0	0	0	0	0	0	0	1	1	2	4	1	1	2	0	0	1
2	2	3	1	3	2	2	2	1	2	2	2	1	1	1	2	1	2	1	1	0	1	1	0	0	0	0	1	1	3	4	3	1	2	1	0	2
2	2	3	1	3	3	3	2	1	2	2	1	1	2	2	2	1	2	1	1	0	0	0	0	0	0	0	1	1	3	4	1	1	2	0	0	1
2	2	3	1	3	3	3	5	2	1	1	3	1	1	1	2	1	2	1	1	1	1	0	0	0	0	0	2	2	4	3	1	1	2	0	0	2
2	2	3	1	2	3	2	3	1	2	3	1	1	1	1	1	1	2	1	1	0	0	0	0	0	1	0	3	1	1	2	3	1	1	0	0	1
2	2	3	1	2	3	2	2	1	1	2	2	1	1	1	2	1	3	1	1	0	0	0	0	0	0	0	1	2	2	4	1	1	2	0	0	0
2	2	3	1	1	3	3	2	1	2	2	2	1	1	1	1	1	3	1	1	1	1	1	0	0	0	0	1	2	2	4	2	1	2	0	0	3
2	2	3	1	4	2	3	1	3	1	2	1	1	1	1	1	1	2	1	1	1	0	0	0	0	0	0	1	1	3	1	3	1	2	0	0	2
2	2	3	1	1	2	3	3	1	1	3	1	1	1	1	2	1	2	1	1	0	0	0	0	0	0	0	3	1	3	4	1	1	2	1	0	0
2	2	3	1	3	2	3	2	2	1	1	1	1	1	1	1	1	2	1	1	0	0	0	0	0	0	0	2	1	1	3	2	1	2	0	0	0
2	2	3	1	3	2	2	2	1	1	2	2	1	1	1	2	1	2	1	1	1	0	0	0	0	0	0	1	2	3	4	1	1	2	0	0	1
2	2	3	1	1	2	2	2	1	2	2	2	1	1	1	2	1	3	1	1	0	0	1	0	0	0	0	1	1	3	4	1	1	2	0	0	2
2	2	3	1	2	2	2	2	1	1	2	1	1	1	1	1	1	2	1	1	1	0	0	0	0	0	0	1	2	1	4	1	1	2	0	0	1
2	2	3	1	1	2	2	2	1	1	2	2	1	1	1	2	1	2	1	1	0	0	0	0	0	0	0	1	1	3	4	2	1	2	0	0	2
2	2	3	1	3	2	2	1	2	1	1	2	1	2	1	1	1	3	1	1	1	1	1	0	1	0	0	2	1	3	4	3	1	2	1	0	4
1	2	3	1	3	2	3	5	3	1	1	1	1	1	1	1	1	3	1	1	1	0	0	0	0	0	0	2	1	1	4	3	1	2	0	1	1
1	2	3	1	2	3	3	2	1	2	2	1	1	1	1	1	1	2	3	4	1	0	1	0	0	0	0	1	1	4	4	2	1	2	0	0	2
1	2	3	1	3	3	3	2	1	2	2	2	1	1	1	1	1	2	1	4	1	1	0	0	0	0	0	1	2	3	4	2	1	2	0	0	2
1	2	3	1	3	2	2	3	3	1	1	2	1	1	1	2	1	3	3	4	1	0	0	0	0	1	1	2	2	4	3	2	2	1	0	0	4
1	2	3	1	3	2	3	5	3	1	1	2	1	1	1	2	1	2	3	1	1	0	0	0	0	0	1	2	1	3	2	2	1	2	0	0	2
1	2	3	1	3	2	3	5	3	1	1	1	1	1	1	1	1	2	3	3	0	0	0	0	0	0	0	2	1	2	4	1	1	2	0	0	0
1	2	3	1	4	2	3	5	#NULL!	1	1	3	1	1	1	1	1	2	2	2	1	0	1	0	0	0	0	2	1	3	1	1	1	2	0	0	2
1	2	3	1	2	3	1	2	1	2	2	2	1	2	2	2	1	2	1	2	1	0	1	0	0	0	0	1	2	4	4	2	1	2	0	0	3
1	2	3	1	1	3	2	2	1	1	3	3	1	1	1	2	1	3	3	1	0	0	1	0	0	0	0	3	1	3	3	1	1	2	0	0	4
1	2	3	1	3	2	2	2	3	1	1	1	1	1	1	1	1	2	3	2	0	1	0	0	0	0	0	2	2	4	4	2	1	2	0	0	1
1	2	3	1	3	2	3	2	2	1	1	2	1	1	1	1	1	3	1	2	0	0	0	0	0	0	0	2	1	3	4	1	1	2	0	0	0
1	2	3	1	3	2	1	1	3	1	3	1	1	1	1	1	1	2	1	1	1	0	0	0	1	0	0	3	1	3	3	1	1	2	0	0	3
1	2	3	1	4	2	3	1	3	1	2	1	1	1	1	1	1	2	4	4	1	0	0	0	0	0	0	1	1	2	1	2	1	1	0	0	2
1	2	3	1	4	2	2	1	3	1	2	1	1	1	1	1	1	2	1	1	1	0	0	0	0	0	0	1	1	3	1	3	1	2	0	0	2
1	2	3	1	3	2	3	2	1	2	2	1	1	1	1	1	1	2	4	4	1	0	0	0	0	0	0	1	1	2	4	1	1	2	0	0	1
1	2	3	1	1	2	2	1	2	1	2	2	1	1	1	2	1	2	4	4	1	0	0	0	0	0	1	1	1	3	4	2	1	2	1	0	4
2	2	1	1	1	3	3	3	1	1	2	2	1	1	1	2	1	2	1	1	1	0	0	0	0	0	0	1	1	1	4	1	1	1	0	0	2
2	2	1	1	2	3	2	2	1	1	2	1	1	1	1	2	1	2	1	1	1	0	0	0	0	0	0	1	2	3	4	2	1	2	0	0	1
2	2	1	1	2	2	3	2	1	1	3	2	1	1	1	2	1	3	3	2	1	0	0	0	0	0	0	3	2	1	1	1	1	2	1	1	1
1	2	1	1	2	2	2	2	1	2	2	2	1	2	1	2	1	2	1	2	1	0	0	0	1	0	0	1	1	2	4	1	1	2	0	0	3
2	1	3	2	1	2	2	2	1	1	2	2	1	1	1	2	1	2	1	1	1	0	0	0	0	0	0	1	2	1	4	1	1	2	0	1	1
2	1	3	1	#NULL!	3	2	3	1	4	3	3	1	1	1	1	1	3	1	1	0	0	0	0	0	0	1	3	1	1	1	1	1	1	1	0	2
2	1	3	1	2	3	2	2	1	2	2	2	1	1	1	2	1	3	1	1	0	0	0	0	0	0	0	1	1	3	4	1	1	2	0	0	1
2	1	3	1	3	3	2	2	1	1	2	2	1	1	1	2	1	4	1	1	0	0	0	0	0	0	0	1	1	4	4	3	1	2	0	0	1
2	1	3	1	1	2	2	4	#NULL!	2	3	2	1	1	2	2	1	2	1	1	0	0	0	0	0	0	0	3	2	1	4	2	1	2	0	0	0
2	1	3	1	2	2	2	2	1	2	2	2	1	1	1	2	1	4	1	1	0	1	0	0	0	0	0	1	1	3	4	1	1	2	0	0	2
2	1	3	1	1	2	2	2	1	2	2	1	1	1	1	2	1	2	1	1	1	0	0	0	0	0	0	1	1	3	4	1	1	2	0	0	1
2	1	3	1	1	2	2	2	1	2	2	1	1	1	1	2	1	2	1	1	1	1	0	0	0	0	0	1	1	3	4	1	1	2	0	0	2
2	1	3	1	2	2	2	2	1	2	2	2	1	1	1	2	1	2	1	1	0	0	0	0	1	0	0	1	2	2	4	2	1	2	0	0	3
2	1	3	1	2	3	3	2	1	1	3	3	1	1	1	2	1	3	1	1	1	1	0	0	0	0	1	3	1	3	1	1	1	2	0	0	4
2	1	3	1	2	3	2	2	1	4	3	3	1	1	1	2	1	3	1	1	0	1	0	0	0	0	0	3	1	1	4	2	1	2	1	0	2
2	1	3	1	3	2	3	2	1	2	2	1	1	1	1	1	1	2	1	1	0	0	0	0	0	0	0	1	1	2	1	1	1	1	0	0	0
2	1	3	1	3	2	3	5	2	1	1	1	1	1	1	1	1	2	1	1	0	1	0	0	0	0	0	2	2	2	4	1	1	2	0	0	1
2	1	3	1	2	3	2	2	1	2	2	3	1	1	1	2	1	2	1	1	1	0	0	0	0	0	0	1	1	2	4	4	1	2	1	0	1
2	1	3	1	2	2	3	3	2	1	3	1	1	1	1	2	1	2	1	1	0	0	0	0	0	0	0	3	1	3	4	3	1	2	0	0	0
2	1	3	1	2	2	2	2	1	1	2	1	1	1	1	1	1	2	1	1	0	0	1	0	0	0	0	1	1	3	4	1	1	2	0	0	1
2	1	3	1	2	2	2	2	1	1	2	2	1	1	1	2	1	2	1	1	0	0	0	0	0	0	0	1	1	2	4	1	1	2	0	0	1
2	1	3	1	2	2	3	2	1	1	2	2	1	1	1	2	1	3	1	1	0	0	0	0	0	0	0	1	2	1	4	1	1	2	0	0	1
2	1	3	1	4	2	1	1	2	1	1	2	1	1	1	2	1	2	1	2	0	0	0	0	0	0	0	2	1	3	1	1	1	1	1	0	0
2	1	3	1	3	2	2	1	2	1	2	1	1	1	1	1	1	2	1	1	0	0	0	0	0	0	0	1	2	1	2	1	1	2	0	0	0
2	1	3	1	3	2	3	5	3	#NULL!	1	1	1	1	1	1	1	3	1	1	0	0	0	0	0	0	0	2	1	2	4	1	1	2	0	0	0
2	1	3	1	3	2	3	2	2	2	2	2	1	1	1	2	1	2	1	1	1	1	0	0	0	0	0	1	1	2	4	1	1	2	0	0	2
2	1	3	1	2	2	3	5	2	1	3	2	1	1	1	2	1	2	1	1	1	0	0	0	0	0	0	3	1	3	1	3	1	2	0	0	3
2	1	3	1	3	2	3	3	1	1	3	3	1	1	1	1	1	3	1	1	1	0	0	0	0	0	0	3	1	3	4	3	4	2	1	0	1
2	1	3	1	3	2	2	2	1	2	2	2	1	1	1	2	1	2	1	1	1	0	0	0	0	0	0	1	1	3	4	1	1	2	0	0	1
2	1	3	1	2	2	2	2	1	1	2	1	1	1	1	2	1	3	1	1	1	0	0	0	0	0	1	1	2	1	3	1	1	1	0	0	3
2	1	3	1	2	2	3	2	1	1	3	2	1	1	1	1	1	3	1	1	0	0	1	0	0	0	0	3	1	3	1	1	1	2	0	0	2
2	1	3	1	3	2	3	1	3	1	2	2	1	1	1	1	1	2	1	1	0	0	0	0	0	0	0	1	1	2	1	2	1	1	0	0	0
2	1	3	1	3	2	3	1	2	1	2	1	1	1	1	2	1	2	1	1	0	0	0	0	1	0	0	1	1	1	4	1	1	2	0	0	2
2	1	3	1	1	2	2	3	1	1	3	2	1	1	1	1	1	2	1	1	0	0	0	0	0	0	0	3	1	4	4	1	1	#NULL!	0	0	0
2	1	3	1	3	2	2	2	3	3	2	2	1	1	1	2	1	2	1	1	0	0	0	0	0	0	0	1	1	1	4	2	1	2	0	0	1
2	1	3	1	3	2	2	1	3	1	1	2	1	1	1	2	1	2	1	1	1	0	0	0	0	0	0	1	1	1	4	1	1	2	1	0	1
2	1	3	1	4	2	3	1	2	1	1	1	1	1	1	1	1	2	1	1	0	0	0	0	0	0	0	2	1	3	3	2	1	2	1	0	0
2	1	3	1	1	2	3	2	1	1	2	2	1	1	1	2	1	3	1	1	0	0	0	0	0	0	1	1	2	1	4	1	1	2	1	0	3
2	1	3	1	2	2	3	2	1	1	3	2	1	1	1	1	1	2	1	1	0	0	0	0	1	0	0	3	1	3	4	4	1	1	0	0	1
2	1	3	1	3	2	3	2	3	1	1	2	1	1	1	2	1	2	4	1	1	0	0	0	0	0	0	1	1	1	1	1	1	1	0	0	1
2	1	3	1	2	2	3	1	2	1	2	3	1	1	1	2	1	3	1	1	1	1	0	0	0	0	0	1	2	3	4	1	1	2	0	0	3
2	1	3	1	3	2	1	2	2	1	1	1	1	1	1	1	1	2	1	1	1	0	0	0	0	0	0	1	2	4	4	2	1	2	0	0	1
1	1	3	1	2	3	3	2	1	1	3	2	1	1	1	1	1	2	3	4	0	0	0	0	0	1	0	3	1	3	3	1	1	2	0	1	1
1	1	3	1	2	3	3	1	3	1	2	2	1	2	1	2	2	3	4	1	0	0	0	1	0	0	0	1	2	4	4	1	4	2	0	1	1
1	1	3	1	3	2	2	2	1	1	2	1	1	1	1	2	1	2	1	1	1	0	0	0	0	0	0	1	2	3	4	1	1	2	0	1	2
1	1	3	1	2	3	2	2	1	1	2	1	1	1	1	1	1	2	1	1	1	1	1	0	0	0	0	1	1	4	4	1	1	2	0	0	3
1	1	3	1	2	2	2	2	1	1	2	2	1	2	2	3	1	1	4	4	0	0	0	1	0	0	0	1	2	3	4	1	1	2	0	1	1
1	1	3	1	3	3	3	2	3	#NULL!	1	2	1	1	1	1	1	2	1	1	1	0	0	0	0	0	0	2	1	1	2	2	1	1	0	0	1
1	1	3	1	2	2	3	3	1	2	3	3	1	1	1	1	1	3	3	4	1	0	0	0	0	0	0	3	2	4	4	2	1	2	0	1	4
1	1	3	1	2	2	2	2	1	2	2	1	1	1	1	1	1	2	4	1	1	0	0	0	0	0	0	1	1	3	4	1	1	2	0	0	1
1	1	3	1	3	2	1	3	1	1	2	3	1	1	1	2	1	2	3	4	1	1	0	0	0	0	0	1	1	1	2	1	1	1	0	0	3
1	1	3	1	2	2	3	2	2	1	3	1	1	1	1	2	1	2	3	4	1	0	0	0	0	0	0	3	1	3	1	1	1	2	0	0	3
1	1	3	1	2	2	2	1	2	1	2	2	1	1	1	2	1	2	3	1	1	0	0	0	0	0	0	1	1	3	4	1	1	2	0	0	1
1	1	3	1	3	2	2	1	2	1	2	1	1	1	1	1	1	2	3	1	0	0	0	0	0	0	0	1	1	3	4	1	1	2	0	0	0
1	1	3	1	2	2	2	1	2	1	2	1	1	1	1	1	1	2	1	1	1	0	0	0	0	0	0	1	1	3	4	1	1	2	0	0	1
1	1	3	1	3	2	3	1	3	1	1	1	1	1	1	1	1	2	3	3	1	0	0	0	0	0	0	2	1	1	4	1	2	2	0	0	1
1	1	3	1	4	2	3	5	3	#NULL!	1	3	1	1	1	1	1	3	3	4	1	1	0	1	0	0	0	2	1	3	4	3	1	2	0	0	3
1	1	3	1	3	2	2	1	3	1	1	2	1	1	1	2	1	2	3	4	0	0	0	0	0	0	0	2	1	3	4	2	1	2	0	0	0
1	1	3	1	3	2	3	2	3	#NULL!	1	2	1	1	1	1	1	2	3	2	0	0	0	0	0	0	0	2	1	3	4	1	1	2	0	0	0
1	1	3	1	3	2	3	2	1	2	2	2	1	2	2	2	1	2	2	1	0	0	0	0	0	0	0	1	1	1	4	3	1	2	0	0	1
1	1	3	1	1	2	2	3	1	1	3	3	1	1	1	3	1	3	1	1	0	0	0	0	0	0	0	3	1	3	1	1	1	2	0	0	2
1	1	3	1	2	2	3	2	1	1	2	2	1	1	1	2	1	2	1	4	1	1	0	0	0	1	0	1	2	1	4	1	1	2	0	0	4
1	1	3	1	2	2	2	3	1	1	3	3	1	3	3	3	1	3	3	4	1	0	0	0	0	0	0	3	1	3	1	#NULL!	1	2	0	0	1
1	1	3	1	3	2	2	3	1	2	3	2	1	1	1	1	1	2	1	1	0	0	0	0	0	0	0	3	1	3	4	4	1	2	1	0	0
1	1	3	1	2	2	2	2	1	1	2	1	1	1	1	2	1	2	2	2	1	0	0	0	0	0	0	1	2	1	4	1	1	2	0	0	1
1	1	3	1	2	2	1	2	1	1	2	2	1	1	1	2	1	2	3	4	1	0	0	0	1	0	0	1	2	1	4	1	1	2	0	0	2
2	1	2	1	3	2	1	1	3	1	1	2	1	1	1	1	1	2	1	1	1	0	0	0	0	0	0	2	1	1	2	2	1	1	1	0	1
1	1	2	1	3	1	2	2	1	1	2	1	1	1	1	1	1	2	1	1	0	0	0	0	0	0	0	1	1	1	4	#NULL!	1	2	0	0	0
2	1	1	1	2	3	2	2	1	3	2	2	1	1	2	2	1	3	1	1	0	0	0	0	0	0	0	1	2	2	4	1	1	2	1	0	1
2	1	1	1	3	3	3	2	3	1	1	2	1	1	1	1	1	2	1	1	1	1	0	0	1	0	0	2	1	3	1	1	1	2	0	0	3
2	5	3	1	1	3	2	3	1	2	3	2	1	1	1	1	1	2	1	1	1	0	1	0	0	0	0	3	2	3	4	2	1	2	0	1	2
2	5	3	1	2	3	3	2	1	1	3	1	1	1	1	2	1	2	1	1	1	0	0	0	0	0	0	3	1	3	4	2	4	2	0	0	1
1	5	3	1	1	3	2	1	3	1	1	3	1	1	1	2	1	3	1	1	0	0	1	0	0	1	0	2	2	4	4	1	1	2	0	1	3
1	5	3	1	1	2	2	5	3	1	2	1	1	1	1	1	1	3	2	1	1	0	0	0	1	0	0	1	1	3	4	1	1	2	0	0	2
1	5	3	1	4	2	3	2	2	1	1	1	1	1	1	1	1	3	1	1	1	0	1	0	0	0	0	2	1	3	4	1	1	2	0	0	3
2	5	1	1	2	3	#NULL!	1	3	1	1	1	1	1	1	1	1	3	1	2	1	0	1	0	0	0	0	2	2	4	4	1	1	2	0	0	4
2	5	1	1	1	2	#NULL!	3	1	1	2	1	1	1	3	1	1	2	1	1	1	1	1	1	0	0	0	1	1	4	4	1	1	2	0	1	4
2	5	1	1	1	3	1	2	1	4	3	1	1	1	1	1	1	3	1	1	0	0	0	0	0	0	0	3	1	3	1	1	1	2	0	1	1
2	5	1	1	1	3	2	2	1	2	2	2	1	1	1	2	1	3	1	1	0	0	0	0	1	0	0	1	1	3	4	2	1	2	0	0	2
2	5	1	1	1	2	2	3	1	1	3	2	1	1	1	2	1	#NULL!	1	1	0	0	0	0	0	0	0	3	1	1	1	1	1	2	1	0	0
2	5	1	1	1	2	3	3	1	4	3	1	1	1	1	2	1	2	1	1	1	0	0	0	0	0	0	3	1	3	1	1	1	2	0	0	1
1	5	1	1	3	4	1	5	3	1	1	2	1	1	1	1	2	4	1	2	0	0	0	0	0	0	0	2	2	1	4	1	1	2	1	0	0
1	5	1	1	1	3	2	1	3	1	1	2	1	1	1	1	1	3	1	1	1	0	0	0	1	1	0	2	1	4	4	3	1	2	0	0	3
1	5	1	1	1	2	2	2	1	1	2	1	1	1	1	1	1	1	3	2	0	0	0	0	0	0	0	1	1	3	2	1	1	2	0	0	1
2	4	3	1	1	3	3	3	1	3	3	1	1	1	3	3	1	2	1	1	0	0	0	0	0	0	0	3	2	3	4	1	4	2	0	1	1
2	4	3	1	1	3	2	3	1	1	3	1	1	1	1	1	1	3	1	1	0	0	1	1	0	0	1	3	2	3	4	4	1	2	0	1	3
2	4	3	1	3	3	3	5	2	1	1	2	1	1	1	1	1	3	1	1	1	0	1	0	0	0	0	2	2	4	4	2	1	2	0	0	4
2	4	3	1	1	2	2	2	1	1	2	1	1	1	1	1	1	2	1	1	0	0	0	0	0	0	0	1	1	2	4	2	1	2	0	1	0
1	4	3	1	3	3	2	1	3	1	3	2	1	1	1	1	1	3	1	1	1	0	1	0	0	0	0	3	1	3	3	2	1	2	1	1	2
1	4	3	1	3	3	2	1	3	1	2	2	1	2	1	1	1	2	4	4	0	0	0	0	0	0	0	1	1	1	4	1	1	2	0	0	1
1	4	3	1	4	3	3	1	3	1	1	3	1	1	1	3	1	3	4	4	1	0	0	0	0	0	0	2	2	4	4	1	1	2	0	0	1
2	4	1	1	2	3	3	3	1	1	3	3	1	1	1	1	1	3	1	1	1	0	0	1	0	0	0	3	1	3	1	1	1	2	0	1	2
2	4	1	1	1	3	2	2	1	1	2	1	1	3	1	2	1	1	1	1	1	0	0	0	0	0	0	1	1	2	4	1	1	2	0	0	1
2	4	1	1	1	3	1	2	3	1	1	3	1	1	1	1	1	3	1	4	0	0	0	0	0	0	0	1	2	4	4	3	1	2	0	0	0
2	3	3	1	2	3	1	2	1	1	2	1	1	1	1	1	1	2	1	1	1	0	1	0	0	0	0	1	1	1	1	2	1	1	0	0	2
2	3	3	1	3	2	3	2	1	1	3	2	1	1	1	2	1	3	1	1	1	1	0	0	0	0	1	3	1	4	4	1	1	2	1	1	4
2	3	3	1	1	3	3	2	1	1	2	1	1	2	1	1	1	2	1	1	0	0	0	0	0	0	0	1	1	1	4	3	1	2	0	0	2
2	3	3	1	2	3	2	3	1	2	3	2	1	1	1	1	1	2	1	1	1	0	0	0	0	0	0	3	2	2	4	1	1	2	0	0	2
1	3	3	1	3	2	2	2	1	1	2	2	1	1	1	1	1	3	1	1	1	0	0	0	0	0	0	1	1	1	4	1	1	2	1	1	1
1	3	3	1	3	2	3	2	3	1	1	1	1	1	1	1	1	2	1	4	1	0	0	0	0	0	0	1	2	1	4	4	4	2	0	0	1
2	3	1	1	3	2	3	5	2	1	1	2	1	1	1	1	1	2	1	2	0	0	0	0	1	0	0	2	1	3	1	4	1	2	0	0	2
2	3	1	1	3	2	2	1	2	1	1	1	1	1	1	1	1	2	1	1	0	0	0	0	0	0	0	2	1	3	4	3	1	2	0	0	1
1	3	1	1	3	3	3	2	1	1	2	1	1	1	1	1	1	2	1	1	1	0	1	0	1	0	0	1	1	3	4	2	1	1	1	0	4
1	3	1	1	2	3	1	3	1	1	3	1	1	1	1	2	1	2	3	1	0	0	0	0	0	1	0	3	1	1	1	2	1	2	0	0	3
2	2	3	1	2	4	1	1	3	1	1	2	1	1	1	1	1	2	1	1	1	0	0	0	0	0	0	2	2	4	1	2	1	2	0	1	3
2	2	3	1	3	2	3	2	1	2	2	2	1	1	1	2	1	2	1	1	0	0	0	0	0	0	1	1	1	3	4	2	1	2	0	0	1
2	2	3	1	1	2	3	2	1	1	2	1	1	1	1	1	1	2	1	1	0	0	0	0	0	0	0	1	1	1	4	1	1	2	0	0	1
2	2	3	1	2	2	3	3	1	1	3	3	1	2	1	3	1	2	1	1	1	1	0	1	1	0	0	3	1	3	1	2	1	2	1	0	4
2	2	3	1	2	2	3	3	1	1	3	2	1	1	1	2	1	2	1	1	1	0	1	1	0	1	0	3	2	3	4	1	1	2	0	0	4
2	2	3	1	3	2	3	2	1	1	2	2	1	1	1	2	1	3	1	1	1	0	0	0	0	0	0	1	1	2	2	3	1	2	0	0	1
1	2	3	1	3	2	2	2	1	1	2	1	1	1	1	2	1	3	1	3	1	0	0	1	1	0	0	1	1	1	4	1	1	2	0	1	3
1	2	3	1	3	2	2	5	3	1	3	2	1	1	1	1	1	2	1	1	1	0	0	0	1	0	0	3	1	3	3	2	1	2	0	0	4
1	2	3	1	3	2	#NULL!	2	3	1	1	1	1	1	1	1	1	2	1	4	0	0	0	0	0	0	0	1	2	1	4	4	4	2	0	0	0
1	2	3	1	2	2	2	1	3	1	3	2	1	1	1	1	1	2	4	4	0	0	0	0	1	0	0	3	1	3	4	3	1	2	0	0	1
1	2	3	1	3	2	1	2	2	1	1	3	1	1	1	1	1	3	1	1	1	1	0	0	0	0	0	1	1	1	4	1	1	2	0	0	2
1	2	3	1	3	2	1	1	3	1	1	2	1	1	1	2	1	2	1	2	1	0	0	1	0	1	0	1	2	3	4	1	2	2	0	0	3
2	2	2	1	3	2	3	2	2	1	1	1	1	1	1	2	1	1	1	1	1	0	0	0	0	0	0	1	1	1	1	5	1	2	0	0	1
1	2	2	1	3	2	2	2	2	1	1	1	1	1	1	1	1	1	1	1	0	1	0	1	0	0	0	1	1	1	1	5	1	2	0	0	2
2	1	3	1	3	1	2	3	1	2	3	2	1	2	1	2	1	2	1	1	1	0	0	0	0	0	1	3	1	4	4	#NULL!	1	1	1	1	4
2	1	3	1	2	4	3	4	1	3	2	3	1	1	1	3	1	4	1	1	0	0	1	1	0	0	0	1	1	1	4	1	1	2	0	1	3
2	1	3	1	1	3	3	#NULL!	1	4	3	2	1	1	1	1	1	1	1	1	0	0	0	0	0	0	0	3	2	3	1	1	1	2	0	1	0
2	1	3	1	2	2	2	2	1	2	2	2	1	1	1	2	1	4	1	1	1	0	1	0	1	0	0	1	1	3	4	1	1	2	1	0	4
2	1	3	1	2	2	3	2	1	2	2	2	1	1	1	1	2	3	1	1	1	0	0	0	1	0	0	1	1	2	1	3	1	2	0	0	2
2	1	3	1	2	2	2	2	1	1	2	2	1	1	1	1	1	2	1	1	0	1	0	0	0	0	0	1	2	3	4	1	1	2	0	0	1
2	1	3	1	2	2	1	2	1	1	2	2	1	1	1	1	1	2	1	1	1	1	0	0	0	0	0	1	1	2	4	1	1	2	0	0	3
2	1	3	1	1	2	3	2	1	1	2	2	1	2	1	2	1	3	1	1	1	0	0	0	0	0	0	1	2	1	4	3	1	2	0	0	1
2	1	3	1	3	2	3	1	3	1	1	1	1	1	1	2	1	1	1	1	0	0	0	0	0	0	0	2	1	1	4	1	1	2	0	0	0
2	1	3	1	4	2	1	1	3	1	1	1	1	1	1	1	1	2	1	1	0	0	0	0	0	0	0	2	1	3	2	4	1	1	0	0	0
2	1	3	1	3	2	2	1	2	1	1	1	1	1	1	1	1	2	1	1	0	0	0	0	0	0	0	2	1	2	1	1	1	1	0	0	0
2	1	3	1	2	2	2	2	1	1	2	1	1	1	1	2	1	2	1	1	0	0	0	0	0	0	0	1	1	4	4	3	1	2	0	0	0
2	1	3	1	2	2	3	2	1	1	2	2	1	2	2	2	1	2	1	1	0	0	0	0	0	0	0	1	2	1	4	1	1	2	0	0	1
1	1	3	1	2	3	2	2	1	1	2	2	1	1	1	1	1	2	2	1	0	0	0	0	0	0	0	1	2	3	4	2	2	2	0	0	0
1	1	3	1	4	1	2	2	3	1	1	2	1	1	1	1	1	2	1	1	1	0	0	0	0	0	0	2	1	4	4	2	4	2	0	0	1
1	1	3	1	3	2	3	3	1	4	3	1	1	1	1	2	1	2	3	1	0	1	0	0	0	0	0	3	2	4	4	2	1	2	0	0	1
1	1	3	1	2	2	3	2	2	1	2	1	1	1	1	1	1	2	3	4	1	0	0	0	0	0	0	1	2	3	3	1	4	1	0	0	1
1	1	3	1	3	2	2	1	3	1	1	3	1	1	1	2	1	3	1	4	1	0	0	1	0	0	0	2	1	3	4	4	2	2	0	0	3
1	1	3	1	3	2	2	1	3	1	1	1	1	1	1	1	1	3	3	4	1	0	0	0	0	0	0	2	2	4	3	2	1	2	0	0	1
1	1	3	1	3	2	2	2	3	1	1	2	1	1	1	1	1	2	1	1	1	0	0	0	0	0	0	1	2	4	4	3	1	2	0	0	1
1	1	2	1	3	2	3	1	3	1	1	3	1	3	3	2	1	2	4	1	0	1	1	0	0	0	0	2	2	1	4	3	1	2	0	0	3
2	1	1	1	2	2	2	1	2	1	1	2	1	1	1	1	1	2	1	1	1	0	0	1	0	0	0	2	1	2	3	1	1	2	0	0	2
1	5	3	1	3	4	3	2	3	1	1	2	1	1	1	1	1	2	1	1	0	0	0	0	1	0	0	2	1	2	2	1	1	1	0	0	2
2	3	3	1	2	3	3	5	3	1	1	2	1	1	1	1	1	3	1	1	1	0	0	0	0	0	0	2	1	3	4	3	1	2	0	1	1
1	2	3	1	3	2	2	2	3	1	1	1	1	1	1	1	1	2	4	4	1	0	1	0	0	0	0	1	2	1	4	1	1	2	1	0	3
1	5	3	1	3	4	2	2	1	1	2	1	1	2	1	2	1	2	1	1	1	0	0	0	0	0	0	1	1	1	4	1	1	2	0	0	1
1	5	3	1	2	3	3	2	3	1	1	2	1	1	1	1	1	2	1	4	1	1	0	0	0	0	0	2	2	1	4	1	1	2	0	0	2
1	4	3	1	3	3	2	1	3	1	1	3	1	1	1	1	2	3	1	1	1	0	0	1	0	0	0	2	2	1	4	1	1	2	0	1	4
1	4	3	1	2	3	3	2	1	1	2	2	1	1	1	1	1	3	1	1	0	0	0	0	0	0	0	1	1	1	4	1	1	2	0	0	1
1	4	3	1	2	3	3	3	1	1	3	1	1	1	1	2	1	2	1	1	0	0	0	0	0	1	0	3	1	3	4	3	1	2	0	0	1
1	4	3	1	2	3	2	1	3	1	1	2	1	1	1	1	1	2	4	1	0	0	0	0	0	1	0	2	2	2	2	1	1	2	0	0	2
2	4	1	1	3	3	2	2	3	1	1	1	1	1	1	1	1	2	1	2	0	0	1	0	0	0	0	2	2	4	4	2	1	2	0	0	1
2	4	1	1	1	3	3	#NULL!	1	1	3	1	1	1	1	1	1	3	1	1	0	0	0	0	0	0	1	3	2	3	4	1	1	2	0	0	2
2	2	3	1	2	3	3	3	1	1	3	1	1	1	1	1	1	2	1	2	0	0	0	0	0	0	0	3	1	2	4	1	1	2	0	0	0
2	2	3	1	2	2	3	3	1	4	3	2	1	1	1	1	1	2	1	1	0	0	0	0	0	0	0	3	2	3	4	1	1	2	0	0	0
1	1	3	1	3	2	2	1	3	1	1	2	1	1	1	1	1	2	2	2	0	1	0	0	0	0	0	2	1	4	2	1	1	2	0	0	1
1	1	3	1	2	2	3	1	2	1	2	2	1	1	1	1	1	3	1	4	1	0	0	0	0	1	0	1	1	3	4	1	1	2	0	0	2
2	5	3	1	1	4	2	2	1	1	2	2	1	1	1	1	1	3	1	2	1	0	0	0	0	0	0	1	1	1	4	1	1	2	0	0	2
2	5	3	1	1	3	2	2	1	1	2	2	1	3	1	3	1	3	1	1	0	0	0	0	0	0	0	1	1	4	4	3	1	2	0	1	2
2	5	3	1	1	#NULL!	2	3	1	1	3	1	1	2	1	2	1	2	1	1	0	0	0	0	0	0	0	3	2	4	4	2	1	2	0	0	0
2	5	1	1	1	2	2	#NULL!	1	3	3	1	1	3	1	2	1	2	1	3	0	0	0	0	0	0	0	3	1	3	4	1	2	2	0	1	0
2	5	1	1	2	4	1	2	1	2	2	2	1	3	3	2	1	4	1	1	1	1	1	0	1	0	0	1	2	3	4	1	1	2	0	0	4
2	5	1	1	1	3	2	4	1	3	1	2	1	2	2	2	1	3	1	1	1	0	0	1	0	0	0	1	2	4	4	1	4	2	0	0	2
2	5	1	1	1	2	1	2	1	1	2	3	1	1	1	2	2	2	1	1	1	0	0	0	0	0	0	1	2	3	4	1	2	2	0	0	1
2	5	1	1	2	2	2	4	1	2	1	3	1	1	1	2	2	3	1	1	1	1	1	1	0	0	0	1	2	3	4	2	4	2	0	0	4
2	5	1	1	1	2	1	2	1	2	2	1	1	2	2	2	1	2	1	1	0	0	0	0	0	0	0	1	2	1	4	1	1	2	0	0	1
1	5	1	1	3	3	2	5	3	1	1	3	1	1	1	2	1	3	1	1	1	0	0	0	0	0	0	2	2	4	4	1	4	2	0	1	4
2	4	3	1	2	3	2	1	3	1	2	1	1	1	1	1	1	2	1	1	0	0	0	0	0	0	0	1	1	3	4	1	2	2	0	1	3
2	4	3	1	1	2	2	2	3	1	1	2	1	1	1	2	1	2	1	1	1	0	1	0	1	0	0	1	2	3	4	3	1	2	0	0	3
1	4	2	1	3	2	2	1	3	1	1	2	1	1	1	1	1	2	3	2	1	0	0	0	1	0	0	1	1	3	1	2	4	2	1	0	3
2	4	1	1	#NULL!	3	3	3	1	3	3	2	1	1	1	3	1	2	1	1	0	0	1	0	0	0	0	3	2	4	4	3	4	2	0	1	2
2	4	1	1	1	3	2	5	3	1	1	2	1	3	3	2	1	3	1	1	0	0	0	0	0	0	0	2	2	4	2	3	2	2	0	0	2
2	4	1	1	2	3	3	3	1	1	3	1	1	2	1	2	1	3	1	1	0	0	0	0	0	0	0	3	1	3	4	3	1	2	0	0	0
2	3	3	1	3	3	3	2	1	1	2	2	1	1	2	2	1	1	1	1	1	1	0	1	0	0	0	1	2	3	4	1	1	2	0	1	3
2	3	3	1	1	3	2	2	1	1	3	1	1	1	1	1	1	3	1	1	1	0	1	1	1	0	0	3	2	3	4	3	1	2	0	0	4
2	3	3	1	1	3	3	2	1	1	3	2	1	1	3	2	1	2	1	1	0	0	0	0	0	0	0	3	2	3	3	2	4	2	0	0	0
1	3	3	1	2	2	2	3	1	1	3	3	1	2	1	2	1	3	1	4	1	0	1	1	0	1	0	3	2	3	4	1	4	2	0	1	4
2	3	1	1	3	2	1	1	2	1	1	1	1	1	1	1	1	1	1	1	0	0	0	0	0	0	0	2	1	1	4	1	1	2	0	0	0
1	2	3	1	4	2	2	2	3	1	1	2	1	1	1	1	1	2	4	2	1	0	0	0	0	0	0	2	2	3	4	1	1	2	0	1	1
2	1	3	1	3	2	2	1	2	1	1	2	1	1	1	2	1	1	1	1	0	0	0	0	0	0	0	2	1	1	1	1	1	2	0	0	0
2	1	3	1	2	2	3	3	1	1	3	1	1	1	1	1	1	2	1	1	0	0	0	0	0	0	0	3	1	3	4	1	1	2	0	0	0
1	1	3	1	1	2	1	2	1	1	3	3	1	1	1	2	1	3	3	4	1	0	0	0	0	0	0	3	2	3	4	4	4	2	0	0	1
2	1	1	1	3	2	1	3	1	1	3	2	1	1	2	2	1	2	1	1	0	0	0	0	0	0	0	3	2	3	3	1	4	2	0	0	0
2	5	3	1	1	4	2	3	1	3	3	3	1	1	1	2	1	3	1	1	1	0	0	0	0	0	0	3	2	3	4	3	2	2	0	0	1
2	5	3	1	1	4	3	3	1	1	3	1	1	1	1	1	1	2	1	1	1	0	0	0	0	0	0	3	1	3	1	1	1	2	0	0	1
2	5	3	1	1	4	1	3	1	1	3	1	1	2	1	2	1	2	1	1	1	0	0	0	0	0	0	3	2	2	4	1	1	2	0	0	1
2	5	3	1	1	3	1	2	1	1	2	2	1	1	1	1	1	2	1	1	1	1	0	0	0	0	0	1	1	1	4	2	1	2	0	0	3
2	5	3	1	3	3	3	2	3	1	1	1	1	1	1	1	1	2	1	1	0	0	0	0	0	0	0	2	1	3	2	1	2	2	0	0	0
2	5	3	1	2	3	1	5	2	1	1	3	1	1	1	1	1	3	1	1	0	0	0	0	0	0	0	2	2	3	4	2	1	2	1	0	0
2	5	3	1	3	3	3	5	2	1	1	2	1	2	1	1	1	3	1	1	0	0	0	0	0	0	0	2	2	4	4	3	1	2	0	0	0
2	5	3	1	3	2	3	5	2	#NULL!	1	3	1	1	1	1	1	3	1	1	1	1	1	0	0	0	0	2	2	3	4	1	2	2	0	0	4
1	5	3	1	3	3	2	1	3	3	2	3	1	1	1	1	2	3	4	4	1	1	0	1	0	1	0	1	2	1	4	1	1	2	0	1	4
1	5	3	1	1	4	3	1	3	1	3	2	1	1	1	2	1	2	1	1	0	0	1	1	0	0	0	3	2	4	4	1	4	2	1	1	2
1	5	3	1	1	3	2	3	1	1	2	1	1	1	1	1	1	2	1	4	0	0	0	0	0	0	0	1	2	4	4	1	1	2	0	1	0
1	5	3	1	2	3	1	1	3	1	3	3	1	1	1	2	1	2	1	2	0	0	1	0	0	0	0	3	1	3	1	2	1	2	0	1	3
1	5	3	1	2	4	3	1	3	1	1	2	1	1	1	1	1	1	1	1	1	0	0	0	0	0	0	2	1	1	4	1	1	2	0	0	1
1	5	3	1	2	4	3	3	1	3	3	2	1	1	1	2	1	3	1	1	1	0	0	1	0	0	0	3	1	3	1	3	1	2	0	0	2
1	5	3	1	1	4	3	#NULL!	1	1	3	1	1	1	1	2	1	2	2	1	1	0	1	0	0	1	0	3	2	1	4	1	1	2	0	0	3
1	5	3	1	2	4	3	1	3	1	1	2	1	1	1	2	1	3	1	1	0	1	0	0	0	0	0	1	2	3	4	1	4	2	0	0	1
1	5	3	1	4	2	3	1	3	1	1	3	1	2	2	3	2	3	1	1	1	0	0	1	0	0	0	1	2	4	4	2	4	2	0	1	2
1	5	3	1	2	3	3	1	3	1	2	2	1	1	1	2	1	3	4	2	0	0	0	0	0	0	0	1	2	1	4	1	1	2	1	0	0
1	5	3	1	3	3	3	2	3	1	1	2	1	1	1	2	1	3	1	1	1	0	0	1	1	0	0	1	2	3	2	1	4	2	0	0	4
1	5	3	1	2	3	2	2	2	1	2	1	1	1	1	1	1	2	4	4	0	0	0	0	0	0	0	1	1	1	4	1	1	2	0	0	1
1	5	3	1	1	3	2	3	1	1	3	1	1	1	1	2	1	2	3	4	0	0	0	0	0	0	0	3	1	3	1	1	1	2	0	0	0
1	5	3	1	2	2	2	5	2	1	3	1	1	1	1	1	1	2	1	1	1	0	0	0	0	0	0	3	1	3	4	1	1	2	0	0	1
1	5	3	1	2	3	3	1	3	1	1	3	1	1	1	2	1	2	1	1	0	0	0	0	1	0	0	2	2	4	4	1	1	2	0	0	2
2	5	1	1	2	2	3	3	1	2	3	2	1	1	1	2	1	2	4	1	1	1	0	1	0	0	0	3	2	3	4	1	1	2	0	1	3
2	5	1	1	2	4	2	5	3	1	1	2	1	1	1	1	1	3	1	1	0	0	1	0	0	0	0	2	2	4	4	2	4	2	0	1	1
2	5	1	1	1	4	3	2	1	3	2	2	1	2	2	2	1	4	1	1	0	0	0	0	0	0	0	1	2	4	4	1	1	2	0	0	1
2	5	1	1	1	4	2	2	2	1	1	2	1	1	1	1	1	3	1	1	0	1	0	1	0	0	0	1	2	4	4	2	1	2	0	1	3
2	5	1	1	1	4	2	5	2	1	1	2	1	2	2	2	1	3	1	1	1	1	0	0	0	0	0	2	1	4	4	1	1	2	0	0	2
2	5	1	1	1	4	3	1	3	1	1	1	1	2	1	1	1	2	1	1	0	0	0	0	1	0	0	2	2	4	2	1	1	2	0	0	1
2	5	1	1	1	4	3	3	1	1	3	1	1	1	1	1	1	2	1	1	1	0	0	0	1	0	0	3	2	4	4	1	4	2	0	0	2
2	5	1	1	1	3	2	#NULL!	1	4	3	2	1	2	2	2	1	2	1	1	0	0	0	0	0	0	0	3	2	4	4	2	1	2	0	0	0
2	5	1	1	#NULL!	4	3	2	1	1	2	2	1	2	2	1	1	2	1	1	1	1	0	0	1	0	0	1	2	1	4	2	1	2	0	0	4
2	5	1	1	1	4	3	2	1	4	3	2	1	1	1	1	1	3	1	1	0	0	0	0	0	0	0	3	1	3	1	1	1	2	1	0	0
2	5	1	1	4	2	3	2	3	1	1	1	1	1	1	1	1	1	1	1	0	0	1	0	1	0	0	2	2	1	4	1	1	2	0	1	2
2	5	1	1	1	3	2	2	1	1	2	2	1	2	2	2	1	2	1	1	1	0	0	0	0	1	0	1	2	1	4	4	1	2	0	0	2
2	5	1	1	2	3	2	2	3	1	1	2	1	1	1	1	1	2	1	1	1	1	0	0	0	0	0	2	2	4	3	1	1	2	0	0	4
2	5	1	1	1	3	3	1	3	1	1	3	1	3	2	1	1	3	1	1	0	0	1	0	0	0	0	2	2	4	4	1	1	2	0	0	1
2	5	1	1	1	2	2	2	1	1	2	3	1	2	1	2	1	3	1	1	1	1	1	0	0	0	0	1	2	3	4	2	1	2	1	0	3
2	5	1	1	1	4	2	1	3	1	1	1	1	2	1	1	1	2	1	1	0	0	1	0	0	0	0	2	2	3	4	1	1	2	1	0	1
2	5	1	1	1	3	1	1	3	1	1	1	1	3	1	2	1	1	1	1	0	0	1	0	0	0	0	2	2	4	4	3	1	2	0	0	1
2	5	1	1	3	2	2	2	2	1	1	3	1	1	1	1	1	2	1	1	0	0	0	0	0	0	0	1	1	1	1	2	1	2	0	0	0
2	5	1	1	1	2	1	2	1	2	1	2	1	2	2	2	1	3	1	1	1	0	1	0	0	0	0	1	2	4	4	1	4	2	1	0	4
1	5	1	1	2	4	2	1	2	1	2	1	1	2	2	2	1	2	1	1	1	0	0	0	0	0	0	1	2	1	4	3	1	2	0	0	1
1	5	1	1	2	3	2	3	1	1	3	1	1	3	2	1	1	2	3	1	0	0	0	0	0	0	0	3	2	3	1	1	1	2	0	0	0
2	4	3	1	3	2	2	1	2	1	1	2	1	1	1	1	1	2	1	1	1	1	0	0	0	0	0	2	1	2	3	2	1	2	0	1	2
2	4	3	1	1	3	3	5	2	1	1	1	1	1	1	1	1	3	1	1	0	0	0	0	0	0	0	2	1	4	4	1	1	2	0	0	0
2	4	3	1	1	3	3	5	3	1	1	1	1	1	1	1	1	3	1	1	0	0	0	0	1	0	0	2	1	4	4	1	1	2	0	0	1
2	4	3	1	1	4	2	5	2	1	1	2	1	1	1	1	1	2	1	1	0	0	0	0	0	0	0	2	2	4	4	1	1	2	0	0	0
2	4	3	1	1	3	2	2	1	2	2	2	1	2	2	3	1	4	1	1	0	0	0	0	0	0	0	1	2	3	4	1	1	2	0	0	1
2	4	3	1	2	3	3	2	2	1	1	2	1	1	1	1	1	3	1	1	1	1	0	0	0	0	0	2	2	2	3	1	1	2	0	0	2
2	4	3	1	1	3	3	2	3	1	1	2	1	1	1	2	1	2	1	1	1	1	0	0	0	0	0	1	2	1	4	3	1	2	0	0	3
2	4	3	1	1	2	1	3	3	#NULL!	1	2	1	1	1	3	1	3	1	1	1	1	1	0	0	0	0	2	2	4	4	2	2	2	0	0	3
1	4	3	1	4	2	3	3	3	1	1	1	1	1	1	1	1	3	1	1	0	0	0	0	0	0	1	2	2	3	3	2	2	2	0	1	2
1	4	3	1	2	3	2	1	3	1	3	2	1	1	1	2	2	3	1	1	1	1	1	1	1	1	0	3	2	3	4	3	2	2	0	1	4
1	4	3	1	3	4	2	2	1	1	2	3	1	2	2	3	2	3	1	1	1	0	0	0	0	0	1	1	2	2	4	2	2	2	1	0	4
1	4	3	1	3	3	3	2	3	1	1	1	1	1	1	1	1	3	3	4	0	0	0	0	0	0	1	1	2	3	4	1	1	2	0	1	2
1	4	3	1	1	3	1	1	2	2	2	2	1	1	2	2	1	2	3	2	0	0	0	0	1	0	0	1	1	3	4	2	1	2	0	0	1
1	4	3	1	3	3	3	1	3	1	1	2	1	1	1	1	1	3	1	1	0	0	0	0	0	0	0	2	2	2	2	1	1	2	0	0	0
1	4	3	1	2	4	2	4	2	1	1	2	1	2	1	1	1	2	1	1	1	0	1	0	0	0	0	1	2	3	3	2	1	2	0	0	2
1	4	3	1	3	3	1	1	3	1	3	2	1	1	1	2	1	2	1	2	1	0	0	1	0	0	0	3	1	3	4	1	1	2	0	0	2
1	4	3	1	2	2	2	1	2	1	1	1	1	1	1	1	1	3	1	1	0	0	0	0	0	0	0	2	1	4	4	1	2	2	1	0	0
2	4	2	1	1	3	3	1	3	1	1	2	1	1	1	1	1	3	1	1	0	0	0	0	0	0	0	2	1	4	4	1	1	2	0	0	0
2	4	2	1	2	1	1	2	3	1	1	2	1	1	1	2	1	3	1	1	0	0	1	0	0	0	0	2	2	2	3	#NULL!	3	2	0	0	2
2	4	1	2	1	4	3	3	1	3	3	2	1	1	1	2	1	3	1	1	1	1	1	1	0	0	0	3	1	3	4	1	1	2	0	1	4
2	4	1	1	1	3	1	2	1	1	2	3	1	2	2	3	1	3	1	1	1	1	1	0	1	0	0	1	2	4	4	2	1	2	1	1	4
2	4	1	1	2	4	3	2	3	1	1	2	1	1	1	1	1	3	1	1	0	0	1	0	0	1	0	2	1	3	4	1	1	2	0	0	4
2	4	1	1	1	3	3	3	1	3	3	3	1	3	3	2	1	3	1	1	1	1	1	1	0	0	0	3	1	4	4	2	1	2	0	1	4
2	4	1	1	3	2	3	2	2	1	1	1	1	1	1	1	1	3	1	2	1	0	0	0	0	0	0	2	1	3	4	1	1	2	1	1	2
2	4	1	1	1	3	3	5	3	1	1	1	1	1	1	1	1	2	1	1	0	0	0	0	0	0	0	2	2	4	1	4	1	2	0	0	0
2	4	1	1	1	3	3	2	1	1	2	1	1	1	1	1	1	3	1	1	1	0	0	0	0	0	0	1	2	2	4	2	1	2	0	0	1
2	4	1	1	2	4	3	1	2	1	1	2	1	2	2	2	1	3	1	1	0	1	0	0	1	0	0	2	2	4	4	3	1	2	0	0	2
2	4	1	1	1	3	3	2	2	1	1	3	1	1	1	1	1	3	1	1	0	0	1	0	1	0	0	2	2	4	4	1	1	2	1	0	3
2	4	1	1	2	3	1	2	1	1	3	3	1	1	1	1	1	3	1	1	0	0	0	0	1	0	0	3	1	3	1	1	1	2	0	0	1
2	4	1	1	2	3	2	3	1	1	3	2	1	2	1	1	1	2	1	1	1	0	0	0	0	0	0	3	1	4	3	2	4	2	0	0	1
2	4	1	1	2	3	2	2	3	1	1	1	1	2	2	2	1	2	1	4	1	1	1	1	0	0	0	1	2	4	4	1	1	2	0	0	4
2	4	1	1	1	3	3	2	1	1	2	1	1	1	1	1	1	3	1	1	1	0	0	0	0	0	0	1	1	2	4	1	1	2	0	0	1
2	4	1	1	2	3	2	#NULL!	1	4	3	3	1	1	1	1	1	2	1	1	1	0	0	0	0	0	1	3	2	3	4	1	1	2	0	0	3
2	4	1	1	3	2	2	2	3	1	1	3	1	2	2	1	1	3	1	1	1	0	1	0	1	0	0	2	1	3	4	3	2	2	0	0	3
1	4	1	1	2	3	2	1	3	1	1	2	1	1	1	1	1	3	4	1	1	0	0	0	1	0	0	2	2	3	4	1	1	2	0	0	2
1	4	1	1	3	3	2	1	3	1	1	2	1	1	1	1	1	2	2	2	1	0	0	0	0	0	0	1	2	1	1	3	1	2	0	0	1
2	4	#NULL!	1	2	4	2	2	3	#NULL!	1	3	1	1	1	2	1	3	1	1	1	0	1	0	0	0	0	2	2	3	4	2	1	2	1	1	4
2	3	3	1	1	3	3	3	1	1	3	2	1	1	1	1	1	2	1	1	0	0	0	0	0	0	0	3	1	3	4	2	1	2	0	1	0
2	3	3	1	1	3	3	5	2	1	1	1	1	1	1	1	1	2	1	1	0	0	0	0	0	0	0	2	2	4	4	1	1	2	0	0	0
2	3	3	1	2	4	2	3	1	1	2	2	1	2	2	3	1	3	1	1	0	0	1	0	0	1	1	1	2	1	4	1	1	2	0	0	4
2	3	3	1	2	3	2	2	1	1	2	1	1	1	1	1	1	3	1	1	0	0	1	0	0	0	0	1	1	2	4	1	1	2	1	0	2
2	3	3	1	2	3	2	5	2	1	1	3	1	2	2	1	1	3	1	1	0	0	0	0	0	0	0	2	2	2	1	4	1	2	0	0	0
2	3	3	1	1	3	1	2	1	1	2	2	1	1	1	1	1	2	1	1	1	0	0	1	0	0	0	1	2	1	4	1	1	2	0	0	3
2	3	3	1	2	3	2	4	1	3	1	3	1	2	2	2	1	3	1	1	1	0	0	0	0	0	0	1	2	3	4	2	4	2	0	0	3
2	3	3	1	2	2	2	1	3	1	1	1	1	1	1	1	1	3	1	1	1	0	0	0	0	0	0	2	2	4	4	1	4	2	0	0	1
2	3	3	1	2	2	2	3	1	3	3	2	1	1	1	1	1	2	1	1	1	0	1	0	0	0	0	3	1	3	4	3	1	2	0	0	2
2	3	3	1	4	2	2	1	3	1	1	1	1	1	1	1	1	2	1	1	1	0	0	0	1	0	0	1	2	3	3	3	1	2	0	0	2
1	3	3	1	1	3	2	3	1	1	3	1	1	1	1	2	1	2	3	4	0	0	0	0	1	0	0	3	1	2	2	1	1	2	0	1	1
1	3	3	1	2	2	3	4	1	1	3	2	1	1	1	2	2	1	4	4	0	0	0	0	0	1	0	3	2	4	4	1	1	2	0	1	1
1	3	3	1	2	1	3	2	1	4	1	2	1	2	1	2	1	1	4	4	1	0	1	0	0	0	0	2	2	4	4	5	1	2	0	0	3
2	3	1	1	3	2	3	2	2	1	1	3	1	2	2	2	2	3	3	1	1	0	1	0	0	0	0	2	1	3	2	1	1	2	1	1	3
2	3	1	1	1	3	3	3	1	4	3	3	1	2	2	3	1	3	1	1	0	0	0	0	0	0	0	3	2	3	1	1	1	2	1	0	1
2	2	3	1	2	2	2	2	1	1	2	3	1	2	2	1	1	3	1	1	0	0	1	1	0	0	0	1	2	1	4	1	1	2	0	1	3
2	2	3	1	4	#NULL!	2	1	3	1	1	3	1	1	2	3	1	3	1	1	1	0	1	0	0	0	0	2	2	3	4	1	1	2	1	1	2
2	2	3	1	3	2	3	5	2	1	1	2	1	1	1	1	1	2	1	1	1	0	0	0	0	0	0	2	1	3	2	3	1	1	0	0	1
2	2	3	1	4	2	3	1	3	1	1	2	1	1	1	1	1	3	1	1	1	0	0	0	0	0	0	2	2	3	4	1	1	2	0	0	2
2	2	3	1	1	2	3	2	1	1	3	2	1	1	1	2	1	1	1	1	0	0	0	0	0	0	0	3	2	1	1	2	1	2	0	0	2
2	2	3	1	1	2	2	2	1	2	2	3	1	1	2	3	1	4	1	1	1	0	1	0	1	0	0	1	2	3	4	1	1	2	1	0	4
2	2	3	1	2	2	2	2	2	1	3	2	1	1	1	2	1	2	1	1	1	0	1	0	0	0	0	3	1	3	4	4	1	2	0	0	2
1	2	3	1	2	3	2	2	1	2	2	2	1	1	1	2	1	4	3	2	1	0	0	0	0	0	0	1	1	3	4	1	1	2	0	0	2
1	2	3	1	2	2	2	5	3	1	1	1	1	1	1	1	1	3	1	1	1	0	1	0	0	0	0	2	1	3	1	1	1	2	0	0	3
1	2	3	1	2	2	1	3	1	1	3	1	1	1	1	1	1	2	1	1	1	0	0	0	0	0	0	3	2	1	1	2	1	2	0	0	2
1	2	3	1	3	2	3	1	3	1	1	2	1	1	1	1	1	3	1	1	0	0	0	1	0	0	0	2	1	4	4	1	4	2	0	0	1
1	2	3	1	2	2	2	1	2	1	1	1	1	2	1	2	1	2	2	2	1	0	0	0	0	0	0	1	2	3	4	2	4	2	0	0	2
2	2	1	1	1	3	1	2	1	1	2	3	1	1	3	2	1	2	1	1	1	1	1	0	0	0	1	1	1	2	4	1	1	2	1	0	4
2	1	3	1	1	2	1	2	1	1	2	1	1	1	1	2	1	3	1	1	1	0	0	1	0	1	1	1	2	1	4	1	1	2	0	1	4
2	1	3	1	1	4	3	1	2	2	2	2	1	1	1	3	1	2	1	1	0	1	1	0	0	0	0	1	2	4	4	1	1	2	0	0	2
2	1	3	1	3	2	3	1	1	1	3	2	1	2	1	2	1	2	1	2	0	0	0	0	0	0	0	3	1	3	3	2	1	1	0	1	1
2	1	3	1	3	2	2	2	2	1	1	2	1	2	2	2	1	3	1	2	0	0	0	0	1	0	0	2	2	3	4	3	2	2	0	0	3
2	1	3	1	3	2	3	2	2	1	1	1	1	1	1	1	1	3	1	1	0	1	0	0	0	0	0	2	2	3	4	4	1	2	0	0	1
1	1	3	1	3	3	2	1	3	1	1	3	1	1	1	1	1	3	1	1	0	0	0	0	1	0	0	2	1	3	2	2	1	2	0	1	3
1	1	3	1	2	2	1	3	1	4	3	2	1	1	1	2	1	3	2	1	1	1	0	0	0	0	0	3	2	3	1	2	1	2	0	0	2
1	1	3	2	2	2	2	1	2	1	2	2	1	1	1	2	1	2	1	1	0	0	0	0	0	0	0	1	2	3	3	1	1	2	0	0	0
1	1	3	1	3	2	1	2	3	1	1	1	1	1	1	1	1	3	3	3	1	0	1	0	0	0	0	2	1	3	4	4	1	2	0	0	2
2	1	2	1	1	1	3	2	1	4	2	3	1	3	3	3	1	3	1	1	1	0	0	0	0	0	0	1	2	2	4	#NULL!	4	2	0	0	1
2	1	1	1	2	2	2	3	1	1	3	2	1	2	2	2	1	3	1	1	0	0	1	0	0	0	0	3	1	2	3	1	1	2	0	1	1
1	5	3	1	4	2	3	1	2	1	1	2	1	1	1	2	1	1	1	1	0	0	1	0	1	1	1	1	2	3	2	3	1	2	0	0	4
2	5	1	1	1	3	2	3	1	4	3	2	1	1	1	1	1	3	1	1	1	0	1	0	0	0	0	3	2	3	4	2	2	2	0	1	2
2	5	1	1	1	3	2	3	1	2	3	2	1	1	1	2	1	2	1	1	1	0	1	0	1	0	0	3	2	3	4	1	1	2	0	0	3
2	5	1	1	1	4	3	1	3	1	1	1	1	1	1	1	1	2	1	1	0	0	0	0	0	1	0	2	2	4	4	1	1	2	0	0	1
2	5	1	1	1	2	2	2	1	1	2	1	1	1	1	1	1	2	1	1	0	0	0	0	1	0	0	1	2	3	4	1	1	2	0	0	1
1	4	3	1	2	3	1	5	2	1	3	3	1	1	1	2	2	3	4	4	1	0	1	1	0	1	1	3	1	1	4	2	1	2	1	1	4
2	4	1	1	2	3	2	2	1	1	2	3	1	1	3	3	1	3	1	1	0	0	1	0	1	0	0	1	2	3	4	1	2	2	0	1	4
2	3	1	1	3	3	1	1	3	1	1	2	1	1	1	2	1	2	1	1	1	0	1	0	0	0	0	2	2	3	4	3	1	2	0	1	3
1	1	3	1	2	2	2	2	2	1	2	3	1	2	3	3	2	3	1	1	1	0	1	1	0	0	0	1	2	3	4	2	1	2	1	1	3
2	5	3	1	4	2	2	2	3	#NULL!	1	3	1	1	1	1	1	3	1	1	1	1	1	0	0	0	0	2	2	4	4	2	4	2	0	1	4
2	5	3	1	1	4	2	1	1	1	1	2	1	2	1	3	1	3	1	1	1	1	0	1	0	0	0	2	2	4	4	1	1	2	1	0	4
2	5	3	1	2	2	2	3	1	1	1	3	1	2	1	3	1	3	1	1	0	0	0	0	0	0	0	2	2	4	4	1	1	2	0	0	2
1	5	3	1	2	3	3	5	3	1	1	1	1	1	1	1	1	3	1	1	1	0	0	0	0	0	0	2	1	1	4	1	1	2	0	0	1
1	5	3	1	2	3	2	1	3	1	2	2	1	2	2	1	1	3	4	1	1	0	1	0	1	0	0	1	2	2	4	1	1	2	0	0	4
1	5	3	1	2	2	3	1	3	1	1	2	1	1	1	1	1	3	4	4	0	0	0	0	1	0	0	2	1	4	4	1	1	2	0	0	1
2	5	1	1	1	4	2	2	1	2	2	2	1	1	1	2	1	3	1	1	0	0	0	0	1	0	0	1	2	3	4	1	1	2	0	0	2
2	5	1	1	2	3	3	2	3	1	1	2	1	2	1	2	1	3	1	1	0	0	0	0	0	0	0	2	2	4	4	1	1	2	0	0	0
2	5	1	1	1	3	2	2	1	1	2	2	1	2	2	2	1	3	1	1	0	0	0	0	0	0	0	1	2	1	4	1	1	2	0	0	1
1	5	1	1	3	3	2	1	3	1	1	3	1	3	3	3	1	3	1	1	1	0	1	1	0	0	1	2	#NULL!	4	4	3	2	2	1	1	4
1	5	1	1	3	3	3	2	3	1	1	1	1	1	1	1	1	1	3	1	1	0	0	1	0	0	0	1	2	2	3	1	1	1	0	0	2
1	5	1	1	2	2	2	#NULL!	3	1	3	2	1	3	1	2	1	2	1	1	0	1	0	0	1	0	1	3	2	4	4	2	1	2	0	0	4
1	4	3	1	2	4	3	1	3	1	1	2	1	1	1	1	1	3	1	1	1	0	1	0	0	0	0	2	2	4	3	2	4	2	0	1	4
1	4	3	1	3	3	3	1	3	1	1	2	1	1	1	2	1	2	1	1	0	0	0	0	0	0	0	2	2	3	3	2	1	2	0	0	2
2	4	2	1	1	#NULL!	2	2	3	1	1	2	1	1	1	2	1	2	1	1	1	1	0	0	0	0	0	1	1	3	4	2	1	2	0	0	2
2	4	1	1	1	3	2	1	3	1	1	3	1	1	2	2	1	3	1	1	0	1	0	0	0	0	0	2	2	4	4	1	1	2	0	0	2
2	4	1	1	2	3	2	1	3	1	1	2	1	2	2	2	1	2	1	1	0	0	0	0	1	0	0	2	2	4	4	2	1	2	0	0	1
2	4	1	1	1	2	2	2	1	1	3	2	1	1	1	1	1	2	1	1	0	0	0	0	0	0	1	3	2	1	1	2	1	2	0	0	1
2	3	3	1	2	3	2	2	1	1	2	3	1	1	1	2	1	3	1	1	1	1	1	0	1	1	0	1	2	1	4	1	1	2	1	0	4
2	2	3	1	2	2	2	3	1	1	2	3	1	1	1	1	1	3	1	1	0	0	1	0	0	0	0	1	1	1	4	2	1	2	0	0	3
1	2	3	1	3	2	2	1	3	1	1	2	1	1	1	2	1	2	3	4	0	0	0	0	1	1	0	2	2	2	4	1	1	2	0	1	2
1	2	3	1	2	2	2	3	1	1	2	3	1	1	1	1	1	3	3	4	0	0	1	1	0	0	0	1	1	1	4	2	1	2	0	0	2
2	1	3	1	1	2	2	2	1	1	2	1	1	1	1	1	1	2	1	1	0	0	0	0	0	0	0	1	2	3	3	1	4	1	0	0	1
2	4	3	1	1	2	1	3	1	4	3	2	1	1	1	1	1	2	1	1	0	0	0	1	0	0	0	3	2	3	4	1	1	2	1	1	1
2	4	3	1	2	3	2	1	3	1	1	2	1	1	1	2	1	3	1	1	0	1	1	0	0	1	0	2	1	3	4	1	1	2	1	1	4
1	4	3	1	3	3	3	1	3	1	3	1	1	1	1	1	1	2	1	4	1	0	0	0	0	1	0	3	1	3	4	2	1	2	0	0	3
1	4	1	1	3	3	3	5	3	1	1	1	1	1	1	1	1	2	1	4	0	0	0	1	0	0	0	2	1	3	2	1	1	1	0	1	1
2	3	3	1	1	3	3	2	1	1	2	3	1	1	1	3	1	2	1	1	1	0	1	1	0	0	0	1	2	3	4	1	1	2	0	1	3
2	3	3	1	3	3	2	1	2	1	1	2	1	1	1	2	1	3	1	1	1	0	0	0	1	0	0	2	2	4	4	1	1	2	0	0	2
1	3	3	1	3	2	2	1	3	1	3	1	1	1	1	1	1	2	1	1	1	0	0	1	0	0	0	3	1	3	3	2	1	1	1	0	4
2	3	1	1	1	3	3	1	2	1	1	2	1	2	2	2	1	2	1	1	0	0	0	0	1	0	0	2	2	3	4	2	1	2	0	0	1
2	2	3	1	3	2	3	2	2	1	1	3	1	2	2	1	2	3	1	1	1	0	1	0	1	0	0	2	2	4	4	2	4	2	1	1	3
1	2	3	1	3	2	2	3	1	1	3	1	1	1	1	1	1	3	4	4	0	0	0	0	0	0	0	3	1	2	4	3	1	2	0	0	0
1	2	3	1	2	3	1	2	1	1	2	2	1	1	1	2	1	2	1	1	1	0	0	0	0	0	0	1	1	4	4	1	1	2	0	0	1
1	2	3	1	2	2	3	2	1	1	3	2	1	1	1	2	1	2	4	4	1	0	1	0	0	0	0	3	1	3	1	1	1	2	0	0	3
2	2	2	1	1	1	2	1	2	1	1	3	1	1	3	2	1	2	1	1	1	0	1	0	0	0	0	2	2	4	4	#NULL!	1	2	0	0	2
2	1	3	1	3	2	2	1	2	1	1	3	1	1	1	3	1	3	1	1	1	0	1	0	1	0	1	2	2	2	4	2	1	2	0	0	4
1	1	3	1	3	2	3	1	3	1	1	3	1	2	2	2	1	3	1	1	1	0	0	0	0	0	0	2	2	3	4	1	4	2	0	0	2
2	5	1	1	2	4	2	2	2	1	1	3	1	1	1	2	1	3	1	1	1	0	1	0	1	0	0	1	2	1	4	1	1	2	0	1	4
2	3	1	1	1	3	3	1	2	1	1	2	1	2	2	2	1	2	1	1	1	0	1	0	0	0	0	2	2	3	4	1	2	2	1	0	2
2	2	3	1	2	3	2	2	1	1	2	2	1	1	1	2	1	2	1	1	1	0	1	1	0	0	0	1	1	2	4	1	1	2	0	0	4
1	5	3	1	1	3	1	3	1	1	3	1	1	1	1	1	1	3	1	1	1	1	0	1	0	0	0	3	2	4	4	1	4	2	0	0	4
1	5	3	1	3	2	2	2	3	#NULL!	1	3	1	1	1	1	1	3	1	1	1	0	1	0	1	0	0	2	2	3	4	1	1	2	0	0	4
2	5	1	1	2	2	3	5	2	1	1	3	1	1	1	1	1	3	1	1	1	0	1	0	0	0	0	2	2	4	4	1	1	2	0	1	2
2	5	1	1	1	3	2	2	1	1	2	3	1	2	2	2	1	3	1	1	1	1	1	0	1	1	0	1	2	1	4	1	1	2	0	1	4
2	5	1	1	2	4	1	2	1	1	3	3	1	3	2	3	1	3	1	1	1	1	1	0	0	1	0	3	2	4	4	1	4	2	0	0	4
2	5	1	1	1	3	3	#NULL!	1	1	3	1	1	3	2	#NULL!	1	2	1	1	0	0	1	0	0	0	0	3	1	3	4	3	1	2	0	0	1
1	4	3	1	1	3	1	1	3	1	1	2	1	2	1	2	1	3	4	4	1	0	1	0	1	1	0	2	2	3	4	1	1	2	1	0	4
1	3	3	1	2	2	3	3	1	#NULL!	3	1	1	1	1	1	1	2	2	1	1	0	0	0	0	0	1	3	1	3	4	4	1	2	0	0	2
1	1	3	1	3	3	2	1	3	1	1	1	1	1	1	1	2	3	1	1	1	0	0	0	0	0	0	2	1	1	2	1	1	1	0	0	1
2	5	3	1	3	4	3	2	1	1	1	2	1	1	1	1	1	3	1	1	0	0	0	0	0	0	0	2	1	2	4	1	1	2	0	0	0
1	5	3	1	3	3	3	5	3	1	1	1	1	1	1	1	1	3	3	4	0	0	0	0	0	0	0	2	2	4	4	3	1	2	0	0	0
2	5	1	1	1	4	3	5	3	1	1	3	1	2	2	1	2	3	1	1	1	1	0	0	0	1	0	2	2	4	4	1	1	2	0	1	3
2	5	1	1	1	#NULL!	1	2	1	1	3	3	1	1	1	3	1	3	1	1	1	0	0	0	0	0	0	3	1	3	1	1	1	2	0	0	2
2	5	1	1	1	4	2	1	2	1	1	2	1	1	1	1	1	3	1	1	0	0	0	1	1	0	1	2	2	4	4	1	1	2	0	1	4
2	5	1	1	2	3	3	2	3	1	1	3	1	2	2	1	1	3	1	1	0	1	1	0	0	0	0	2	1	4	2	2	1	2	0	1	4
2	5	1	1	1	4	3	5	2	1	1	1	1	1	1	1	1	3	1	1	0	0	0	0	0	0	0	2	2	4	4	1	1	2	0	0	0
2	5	1	1	3	3	3	5	3	1	1	3	1	1	1	1	1	3	1	1	1	0	1	0	1	0	0	2	1	3	1	1	1	2	0	0	4
2	5	1	1	1	2	3	3	1	1	3	2	1	1	1	2	1	2	1	1	1	0	1	0	0	1	0	3	2	4	4	1	4	2	0	0	3
2	4	3	1	1	3	2	3	1	2	3	1	1	1	2	1	1	3	1	4	1	0	0	0	0	0	0	3	2	3	4	2	1	1	0	0	1
2	4	3	1	1	3	2	2	1	1	2	3	1	1	1	1	1	3	1	1	1	0	1	0	0	0	0	1	2	3	4	1	1	2	0	0	3
1	4	3	1	1	3	1	2	1	1	2	1	1	1	1	1	1	3	1	1	1	0	0	0	0	0	0	1	1	1	4	1	1	2	0	0	1
1	4	1	1	4	3	3	1	3	1	3	2	1	2	1	1	1	3	3	1	0	1	0	0	1	0	0	3	1	3	1	1	1	1	0	0	3
2	1	3	2	1	2	3	3	1	1	3	3	1	2	2	3	1	3	1	1	0	0	0	1	0	0	1	3	1	3	4	4	1	2	0	1	2
1	1	3	1	3	2	1	2	3	1	1	1	1	1	1	2	1	3	1	3	0	0	0	0	0	1	0	2	1	2	1	1	1	1	1	0	1
2	5	3	1	1	4	3	3	1	3	3	2	1	2	2	1	2	3	1	1	0	0	0	1	0	0	0	3	2	4	4	1	4	2	0	1	1
2	5	3	1	1	3	2	#NULL!	1	1	3	1	1	2	1	2	1	2	1	2	0	0	0	0	1	0	0	3	1	1	4	1	4	2	0	0	1
1	5	3	1	1	3	3	1	3	1	2	2	1	1	1	1	1	3	1	3	0	0	0	0	1	0	0	1	1	2	4	2	1	2	0	0	1
2	5	1	1	1	3	3	3	1	3	3	2	1	1	1	1	1	3	1	1	1	0	0	0	0	0	1	3	2	3	4	1	1	2	1	1	2
2	5	1	1	1	3	3	2	1	1	3	2	1	3	3	1	1	1	1	1	0	0	0	0	0	0	0	3	2	2	4	1	1	2	0	1	1
2	5	1	1	1	4	2	4	3	#NULL!	1	3	1	2	2	1	2	3	1	1	1	0	1	1	1	0	0	1	2	4	4	1	4	2	0	0	4
1	5	1	1	4	2	3	2	3	1	1	3	1	3	3	2	1	3	3	1	0	0	0	0	0	0	0	2	2	4	4	#NULL!	4	2	0	0	2
#NULL!	3	1	#NULL!	1	3	1	2	1	1	3	3	1	1	1	1	1	3	1	1	0	0	0	0	0	0	0	3	1	4	2	1	1	2	0	1	2
1	1	3	1	1	2	2	3	1	1	3	2	1	1	1	2	1	3	1	1	0	0	0	0	0	0	0	3	2	3	4	1	1	2	0	0	0
2	5	3	1	1	4	1	3	1	2	3	1	1	1	1	1	1	3	1	4	0	0	0	0	0	0	0	3	1	3	4	2	1	1	0	0	0
2	5	3	1	2	4	1	1	3	1	1	3	1	1	1	3	2	3	1	1	1	1	0	0	0	0	0	2	2	4	4	1	1	2	0	0	3
2	5	1	1	1	4	#NULL!	3	1	1	3	1	1	1	1	2	1	2	1	1	1	0	1	0	0	0	0	3	2	4	4	2	4	2	0	0	2
1	5	1	1	3	3	2	1	3	1	1	3	1	1	1	2	2	3	1	4	0	0	1	1	1	0	0	2	2	4	4	1	4	2	1	0	4
2	4	3	1	1	3	2	2	1	1	2	2	1	2	1	2	1	3	1	1	0	0	1	0	0	0	0	1	2	2	4	1	1	2	0	0	3
2	4	1	1	1	3	2	#NULL!	1	1	3	3	1	1	1	2	1	3	1	1	1	0	1	1	0	0	0	3	2	4	4	1	4	2	0	0	3
2	3	1	1	3	2	2	2	3	1	1	3	1	3	3	3	1	3	1	1	1	1	1	0	1	0	1	2	1	2	4	4	4	2	0	0	4
1	4	3	1	4	2	2	#NULL!	3	1	1	1	0	1	1	1	1	3	2	2	1	0	0	0	0	0	0	2	1	2	3	1	1	2	0	0	1
2	4	1	1	1	3	2	2	1	1	2	1	0	1	1	1	1	2	1	1	0	0	0	0	0	0	0	1	2	3	2	1	1	2	0	0	0
1	2	3	1	2	2	1	2	1	1	3	1	0	1	1	1	1	2	3	4	1	0	0	0	0	0	0	3	1	3	1	3	1	2	0	0	1
1	2	3	1	1	2	2	2	1	1	3	2	0	1	1	1	1	2	3	4	1	0	0	0	0	0	0	3	1	2	4	1	1	2	0	0	3
2	2	1	1	3	2	3	2	1	1	2	1	0	3	3	3	1	2	1	1	0	0	0	0	0	0	0	1	2	4	4	5	1	2	0	0	0
#NULL!	2	1	#NULL!	3	2	3	2	1	1	3	3	0	1	1	2	1	2	4	4	1	0	0	0	0	0	0	3	1	3	1	1	1	2	0	0	2
2	1	3	1	2	2	2	2	1	1	2	1	0	1	1	1	1	3	1	1	0	0	1	0	0	0	0	1	1	3	4	1	1	2	0	1	3
2	1	3	1	3	2	2	2	3	1	1	1	0	1	1	1	1	2	1	1	0	0	0	0	0	0	0	1	2	4	1	1	1	2	0	0	0
1	1	3	1	2	2	3	2	1	1	3	3	0	1	1	1	1	2	3	4	0	0	0	0	0	0	0	3	1	4	1	1	1	2	1	1	1
1	1	3	1	1	2	2	2	1	1	2	2	0	1	1	2	1	2	1	1	0	0	1	0	0	0	0	1	2	3	4	2	1	2	0	0	2
2	2	3	1	1	2	3	2	1	1	3	2	0	1	1	2	1	#NULL!	1	1	0	0	0	0	0	0	0	3	1	3	1	1	1	2	0	0	1
1	1	3	1	3	2	3	3	1	1	3	3	0	1	1	1	1	#NULL!	4	4	1	0	1	0	0	0	0	3	1	3	1	1	1	2	1	1	3
2	1	3	1	3	2	3	1	2	1	3	1	0	1	1	1	1	2	1	1	1	0	0	0	0	0	0	3	1	2	3	2	1	2	0	0	1
2	1	3	1	2	2	3	3	1	1	3	3	0	1	1	1	1	2	1	1	1	1	0	0	0	0	0	3	2	3	4	2	4	2	1	0	2
2	5	3	1	1	4	2	2	1	1	2	1	0	1	1	2	1	2	1	1	1	0	0	0	0	0	0	1	2	1	3	2	1	2	0	1	3
2	5	3	1	1	4	3	2	1	1	2	1	0	1	1	1	1	2	1	1	0	0	0	0	0	0	0	1	2	1	3	2	1	2	0	0	0
2	5	3	1	1	4	1	3	1	1	2	1	0	1	1	1	1	2	1	1	1	1	0	0	0	0	0	1	1	4	4	1	1	2	0	0	2
2	5	3	1	2	3	2	1	3	1	2	3	0	1	1	1	2	3	1	1	1	0	0	1	0	0	1	1	2	1	4	1	1	2	0	1	4
2	5	3	1	1	4	3	2	1	1	2	1	0	1	1	1	1	2	1	1	1	0	0	0	0	0	0	1	1	1	2	2	1	2	0	0	1
2	5	3	1	1	4	2	2	1	1	2	1	0	2	1	2	1	2	1	1	0	0	0	0	0	0	0	1	1	1	4	1	1	1	0	0	1
2	5	3	1	1	2	2	1	3	1	2	2	0	1	1	1	1	2	1	1	1	0	1	1	0	0	0	1	1	3	4	1	1	2	0	1	4
2	5	3	1	1	4	3	2	1	1	2	2	0	1	1	2	1	2	1	1	1	0	0	0	0	0	0	1	1	4	4	1	1	2	0	0	1
2	5	3	1	1	4	1	2	1	1	2	3	0	1	1	1	1	2	1	1	1	0	1	0	0	0	0	1	2	3	4	1	1	2	0	0	2
2	5	3	1	1	3	2	3	1	1	2	1	0	1	1	1	1	2	1	1	0	0	0	0	0	0	0	1	1	4	4	1	1	2	0	0	0
2	5	3	1	1	4	2	2	1	1	2	2	0	1	1	1	1	2	1	1	1	0	0	0	0	0	0	1	1	1	4	1	1	2	0	0	2
2	5	3	1	1	3	3	2	1	1	2	1	0	2	1	1	1	2	1	1	0	0	0	0	0	0	0	1	2	3	4	1	1	2	0	0	2
2	5	3	1	1	3	2	2	1	1	2	3	0	1	1	1	1	2	1	1	1	0	0	0	0	0	0	1	2	3	4	1	1	2	0	0	1
2	5	3	1	1	3	2	2	1	2	2	2	0	1	1	2	1	4	1	1	0	0	0	0	0	0	0	1	2	3	4	2	1	2	0	0	0
2	5	3	1	2	2	2	5	2	1	1	1	0	2	1	1	1	2	3	1	1	0	0	0	0	0	0	1	2	2	4	3	4	2	0	0	2
2	5	3	1	1	4	3	2	1	1	2	3	0	1	1	1	1	3	1	1	1	0	1	0	0	0	0	1	1	2	3	3	1	2	0	0	2
2	5	3	1	1	3	3	2	3	1	1	2	0	1	1	2	1	2	1	1	1	0	0	0	0	0	0	1	2	3	4	3	1	2	0	0	1
2	5	3	2	2	2	2	2	3	1	1	1	0	1	1	1	1	2	1	1	1	0	0	0	0	0	0	2	1	3	4	1	1	2	0	0	1
2	5	3	1	1	3	2	1	2	1	1	2	0	1	1	2	1	2	1	1	1	0	0	0	0	0	0	1	2	3	4	1	1	2	0	0	2
2	5	3	1	3	3	2	5	3	1	1	2	0	1	1	1	1	3	1	1	0	0	1	0	0	0	0	2	1	3	2	1	1	2	1	0	2
2	5	3	1	1	3	1	3	1	1	2	2	0	1	1	1	1	2	1	1	0	0	0	0	0	0	0	1	1	4	4	1	1	2	0	0	0
2	5	3	1	3	2	3	2	3	1	1	1	0	1	1	1	1	3	1	1	1	0	0	0	1	0	0	2	1	3	1	1	1	1	0	0	2
2	5	3	2	2	2	3	5	3	1	1	3	0	1	1	3	1	2	1	1	1	0	1	0	0	1	0	2	2	2	4	2	1	1	1	0	4
2	5	3	1	4	2	1	5	3	1	1	2	0	1	1	2	1	2	1	1	1	0	0	0	0	0	0	2	1	3	3	2	1	2	0	0	3
1	5	3	1	4	2	2	5	3	1	1	2	0	1	1	2	1	3	4	4	0	0	0	0	0	1	0	2	2	4	4	1	4	2	0	1	1
1	5	3	1	2	3	3	1	3	1	2	2	0	2	1	1	1	2	2	2	1	0	1	0	0	1	0	1	1	1	4	1	1	2	0	1	4
1	5	3	1	3	3	3	1	3	1	1	2	0	2	1	2	1	3	1	1	0	0	0	0	0	1	0	2	1	4	4	1	1	2	0	1	1
1	5	3	1	3	3	2	1	3	1	1	2	0	1	1	2	1	3	1	3	1	0	1	0	0	1	0	2	1	4	2	3	2	1	0	1	3
1	5	3	1	3	3	3	1	3	1	3	3	0	1	1	2	1	3	1	2	0	0	0	0	0	0	0	3	1	3	4	3	1	2	0	1	1
1	5	3	1	3	4	2	1	3	1	2	3	0	1	1	1	1	2	1	1	0	0	1	0	0	0	0	1	2	3	4	1	1	2	1	0	1
1	5	3	1	3	3	3	1	#NULL!	1	1	2	0	2	1	1	1	3	1	1	0	0	1	0	0	0	0	1	1	1	4	2	1	2	1	1	1
1	5	3	1	1	3	3	1	3	1	1	3	0	1	1	2	1	2	1	1	0	0	0	1	0	0	0	2	2	4	4	1	1	2	0	1	1
1	5	3	1	1	4	3	1	3	2	2	2	0	2	2	1	1	2	4	2	1	0	0	0	0	0	0	1	2	3	4	1	1	2	0	0	1
1	5	3	1	3	4	2	1	3	1	3	1	0	3	1	2	1	3	1	1	0	0	0	0	0	0	0	3	1	3	4	3	1	2	0	0	0
1	5	3	1	4	3	2	1	3	1	1	1	0	1	1	1	1	3	1	1	0	0	0	0	0	0	0	2	1	2	4	1	1	2	0	0	2
1	5	3	1	3	3	3	1	3	1	1	2	0	1	1	1	1	4	1	1	1	0	0	0	0	0	0	2	1	3	2	2	3	2	0	0	2
1	5	3	1	3	3	3	2	3	1	1	2	0	1	1	2	1	2	4	2	1	0	0	0	0	0	0	1	1	2	2	1	1	1	0	0	1
1	5	3	1	3	3	2	1	3	1	1	2	0	1	1	2	1	2	1	1	1	0	0	0	0	0	0	1	2	3	4	1	1	2	0	0	2
1	5	3	1	4	3	3	1	3	1	1	1	0	1	1	1	1	2	1	2	0	0	0	0	0	0	0	2	1	1	1	1	1	2	0	0	0
1	5	3	1	1	3	2	4	1	1	2	1	0	2	3	2	1	2	1	1	0	0	0	0	0	0	0	1	1	3	4	2	1	2	0	0	1
1	5	3	1	2	3	2	1	3	1	1	2	0	2	1	2	1	3	1	4	1	1	0	0	0	0	0	2	1	4	4	2	1	2	1	0	3
1	5	3	1	3	3	2	1	3	1	1	1	0	1	1	2	1	2	1	1	0	0	0	0	0	0	0	2	1	3	4	1	1	2	0	0	2
1	5	3	1	3	3	1	3	2	1	2	2	0	1	1	1	1	2	1	1	1	0	0	0	1	0	0	1	1	4	4	1	1	2	0	0	2
1	5	3	1	4	2	2	2	3	1	1	3	0	1	1	1	1	3	1	1	1	0	1	0	0	0	1	2	2	3	1	2	2	1	0	0	4
1	5	3	1	3	1	2	5	3	1	1	2	0	2	1	2	1	3	1	2	0	0	0	0	0	0	1	2	1	1	1	#NULL!	1	2	1	0	1
1	5	3	1	2	3	3	1	3	1	2	1	0	1	1	1	1	2	1	2	0	0	0	0	0	0	0	1	1	2	4	3	1	2	0	0	2
1	5	3	1	2	2	2	5	2	1	2	1	0	1	1	1	1	3	1	1	0	0	0	0	0	0	0	1	1	3	4	1	1	2	0	0	1
1	5	3	1	3	2	1	1	3	1	1	2	0	1	1	2	1	2	1	1	0	0	1	0	0	0	0	1	2	4	4	2	1	2	0	0	1
2	5	2	1	1	4	1	2	1	1	2	2	0	1	1	1	1	3	1	1	0	0	0	0	0	0	0	1	2	1	4	1	1	2	0	0	0
2	5	2	1	1	4	2	2	1	1	2	1	0	2	2	2	1	2	1	1	1	0	0	0	0	0	0	1	2	2	3	2	1	2	0	0	1
2	5	2	1	1	2	2	2	1	1	3	1	0	1	1	1	1	2	1	1	1	1	0	0	0	0	0	3	1	3	4	1	1	2	0	0	2
2	5	1	1	3	4	3	2	3	1	1	3	0	1	1	1	1	3	1	1	1	0	0	0	0	0	0	2	2	3	4	1	1	2	0	1	3
2	5	1	1	1	2	1	1	2	1	2	1	0	1	1	1	1	2	1	1	1	0	0	0	1	0	0	1	1	3	4	1	1	2	0	1	3
2	5	1	1	1	4	2	2	1	1	2	1	0	1	1	1	1	2	1	1	1	0	0	0	0	0	0	1	2	3	4	1	1	2	0	1	1
2	5	1	1	1	4	1	3	1	1	2	3	0	3	1	1	1	3	1	1	0	0	1	0	0	0	0	1	2	1	4	1	1	1	1	0	1
2	5	1	1	1	4	1	2	1	1	2	2	0	1	1	1	1	2	1	1	1	0	1	0	1	0	0	1	2	3	4	1	1	2	0	0	3
2	5	1	1	1	2	2	2	1	1	2	2	0	1	1	2	1	2	1	1	1	0	0	0	0	0	0	1	2	3	4	1	1	2	0	1	1
2	5	1	1	1	3	2	2	2	1	1	2	0	2	2	2	1	2	1	1	0	1	0	0	0	0	0	1	2	2	3	1	1	2	0	1	1
2	5	1	1	1	4	1	2	1	1	2	1	0	3	2	3	1	2	1	1	1	0	1	0	0	0	1	1	2	1	4	3	1	2	1	0	4
2	5	1	1	1	3	2	#NULL!	1	2	3	2	0	2	1	2	1	2	1	1	1	0	0	1	0	0	0	3	2	3	4	1	1	2	0	1	2
2	5	1	1	1	3	2	3	1	1	3	2	0	2	2	1	1	1	1	1	1	0	0	0	0	0	1	3	2	4	4	1	1	2	0	1	3
2	5	1	1	2	3	2	3	1	4	3	2	0	1	1	2	1	3	1	1	1	0	1	0	0	0	0	3	1	3	4	1	1	2	0	0	2
2	5	1	1	1	4	2	2	1	1	2	2	0	1	1	1	1	2	1	1	0	0	1	0	0	1	1	1	2	3	4	1	1	2	0	0	3
2	5	1	1	1	3	3	3	1	1	3	2	0	2	2	2	1	3	1	1	1	0	0	0	0	0	0	3	1	3	4	1	1	2	0	0	1
2	5	1	1	2	3	2	3	1	1	3	1	0	1	1	1	1	2	1	2	0	0	0	0	0	0	0	3	2	3	3	1	1	2	0	0	0
2	5	1	1	3	4	3	1	2	1	1	2	0	2	1	2	1	3	1	1	1	0	0	0	0	1	0	2	2	2	4	1	1	2	0	0	2
2	5	1	1	1	3	2	2	1	1	2	2	0	2	1	1	1	2	1	1	1	0	0	0	1	0	0	1	2	1	4	1	2	2	0	0	2
2	5	1	1	1	3	1	2	1	1	2	2	0	1	1	2	1	2	1	1	1	1	0	0	0	0	0	1	2	3	4	1	1	2	0	0	2
2	5	1	1	2	3	2	2	2	1	1	1	0	1	1	1	1	3	1	1	0	0	1	0	0	0	0	2	1	2	1	1	1	1	0	0	2
2	5	1	1	2	3	3	2	1	4	3	1	0	1	1	1	1	3	1	1	1	0	0	0	0	0	0	3	2	3	1	1	1	2	1	0	2
2	5	1	1	1	3	3	3	1	3	3	2	0	1	1	2	1	2	1	1	0	0	0	0	0	0	0	3	1	4	4	4	1	2	0	0	0
2	5	1	1	1	3	3	#NULL!	1	2	3	2	0	2	2	2	1	2	1	2	0	0	0	0	0	0	0	3	2	3	4	3	1	2	0	0	0
2	5	1	1	1	3	2	1	2	1	1	2	0	1	1	2	1	2	1	1	0	0	0	0	0	0	0	2	2	4	4	1	4	2	0	0	0
2	5	1	1	1	3	2	2	1	1	2	2	0	1	2	2	1	1	1	1	0	1	0	0	0	0	0	1	2	3	4	1	1	2	0	0	1
2	5	1	1	1	3	2	2	2	1	1	1	0	1	1	1	1	1	1	1	0	0	0	0	0	0	0	2	1	3	4	1	1	2	0	0	0
2	5	1	1	1	3	3	2	1	3	3	2	0	1	1	2	1	2	1	1	0	0	0	0	0	0	0	3	1	1	1	1	1	2	0	0	0
2	5	1	1	1	3	2	1	2	1	1	1	0	1	1	1	1	2	1	1	1	1	1	0	0	0	0	2	2	3	4	1	1	2	0	0	3
2	5	1	1	2	3	3	1	3	3	1	1	0	3	1	1	1	2	1	1	1	0	0	0	1	0	0	2	1	4	4	2	1	2	0	0	2
2	5	1	1	1	2	#NULL!	1	2	1	1	1	0	1	1	1	1	2	1	1	0	0	0	0	0	0	0	2	2	4	4	1	1	2	0	0	1
2	5	1	1	1	2	2	2	1	1	2	2	0	1	1	2	1	2	1	1	0	0	0	0	0	0	0	1	2	3	4	1	1	2	0	0	0
2	5	1	1	2	3	3	2	3	1	1	1	0	2	2	1	1	2	1	4	0	0	0	0	0	0	0	1	2	2	4	1	1	#NULL!	0	0	0
2	5	1	1	1	3	3	2	1	3	2	2	0	2	1	2	1	2	1	1	1	0	1	0	0	0	0	1	1	2	4	2	1	2	1	0	2
2	5	1	1	1	3	1	1	2	1	1	2	0	1	1	1	1	3	1	1	1	0	0	0	0	0	0	1	2	1	1	1	1	2	1	0	2
2	5	1	1	1	3	3	2	3	1	1	1	0	1	1	1	1	2	1	1	0	1	0	0	0	0	0	1	1	1	1	1	1	1	0	0	1
2	5	1	1	1	2	2	2	1	1	2	2	0	1	1	2	1	2	1	1	0	0	1	0	0	0	0	1	2	3	4	1	1	2	0	0	1
2	5	1	1	1	2	1	2	1	1	2	1	0	1	1	2	1	2	1	1	0	0	0	0	0	0	0	1	2	3	4	1	2	2	0	0	0
2	5	1	1	2	3	2	1	2	1	1	2	0	1	1	2	1	2	1	1	1	0	0	0	0	0	0	1	1	4	4	1	1	2	0	0	2
2	5	1	1	3	2	2	1	3	1	1	2	0	3	2	1	1	3	1	1	1	0	0	0	0	0	0	1	2	4	4	1	1	2	1	0	1
2	5	1	1	1	3	3	1	2	1	1	1	0	1	1	2	1	2	1	1	0	0	0	0	0	0	0	2	1	4	2	1	1	2	0	0	0
1	5	1	1	2	4	2	1	3	1	1	2	0	1	1	1	1	3	1	1	0	0	0	0	0	0	0	2	2	2	4	1	1	2	0	1	0
1	5	1	1	2	4	2	2	1	1	2	1	0	2	2	2	1	2	2	4	1	0	0	0	0	1	0	1	2	1	4	1	1	2	0	0	2
1	5	1	1	2	4	2	2	1	1	2	1	0	1	1	1	1	2	3	4	0	0	0	0	0	0	0	1	1	3	4	1	1	2	0	0	0
1	5	1	1	3	3	1	4	1	1	1	3	0	1	1	2	1	3	4	4	1	1	1	0	0	1	0	2	1	4	4	4	4	2	0	1	4
1	5	1	1	3	3	1	1	3	1	1	1	0	1	1	1	1	2	1	3	1	0	1	0	0	0	0	2	1	2	1	2	3	2	0	1	2
1	5	1	1	2	3	2	3	1	1	3	2	0	2	1	2	1	3	4	4	1	1	1	0	1	0	0	3	2	3	4	1	1	2	0	0	4
1	5	1	1	3	3	3	1	3	1	1	2	0	3	1	2	1	3	1	3	1	0	0	0	0	0	0	2	2	3	4	2	2	2	0	0	2
1	5	1	1	2	3	2	2	1	1	3	1	0	1	1	1	1	2	1	1	0	0	0	0	0	0	0	3	1	1	1	1	1	2	0	0	0
1	5	1	1	2	3	1	1	3	1	3	2	0	1	1	1	1	2	1	1	1	0	0	0	0	0	0	3	1	3	4	1	1	2	0	0	1
1	5	1	1	2	3	2	1	3	1	1	1	0	1	1	1	1	3	3	4	1	0	0	0	0	0	0	2	1	4	3	1	1	2	0	0	1
1	5	1	1	2	2	2	2	1	1	2	1	0	1	1	2	1	3	3	1	1	0	0	0	0	0	0	1	1	1	3	1	1	1	0	0	1
1	5	1	1	1	3	3	2	1	4	3	1	0	1	1	1	1	2	1	4	0	0	0	0	0	0	0	3	1	1	1	1	1	2	0	0	0
1	5	1	1	1	2	3	1	2	1	2	1	0	1	1	1	1	2	4	2	1	0	0	0	0	0	0	1	1	1	4	1	1	2	0	0	1
2	4	3	1	2	3	1	4	#NULL!	2	3	3	0	1	2	3	1	2	1	1	0	0	0	0	0	1	0	3	2	4	4	1	4	2	0	1	1
2	4	3	1	3	3	2	2	3	1	1	2	0	1	1	1	1	3	1	1	1	1	1	0	0	0	0	2	2	2	2	1	1	1	1	1	3
2	4	3	1	2	3	3	1	2	1	1	1	0	1	1	2	1	4	1	1	0	0	0	0	0	1	0	2	1	3	2	2	1	1	1	1	1
2	4	3	1	3	3	3	1	3	1	1	2	0	1	1	2	1	2	1	1	1	0	1	0	0	0	0	2	2	3	4	5	1	2	0	1	4
2	4	3	1	1	3	2	2	1	1	2	1	0	1	1	1	1	3	1	1	1	0	0	0	0	0	0	1	1	1	3	1	1	2	1	1	2
2	4	3	1	1	4	3	1	2	1	1	3	0	1	1	3	1	3	1	1	0	0	0	0	0	0	0	1	2	2	4	2	1	2	1	0	2
2	4	3	1	1	3	2	1	3	1	1	3	0	2	1	2	1	3	1	1	0	0	1	0	0	0	0	2	1	4	4	1	1	2	0	1	1
2	4	3	1	3	3	1	1	3	1	2	2	0	1	1	1	1	1	1	1	0	0	0	0	0	0	0	1	1	1	4	1	1	2	0	1	0
2	4	3	1	1	4	2	2	1	1	2	1	0	1	1	2	1	2	1	1	1	0	0	0	0	0	0	1	1	2	4	2	1	2	0	0	1
2	4	3	1	2	3	3	1	3	1	1	3	0	1	1	2	1	3	1	1	1	1	1	0	1	0	0	2	2	1	4	1	1	2	0	1	4
2	4	3	1	1	3	3	1	2	1	1	2	0	2	2	#NULL!	1	3	1	1	1	0	0	1	1	1	0	2	1	4	4	1	1	2	1	1	4
2	4	3	1	1	3	3	2	1	1	2	1	0	2	1	3	1	3	1	1	0	0	0	0	0	0	0	1	1	3	4	1	1	2	0	1	0
2	4	3	1	3	3	2	2	1	3	1	1	0	1	1	1	1	2	1	1	0	0	0	0	0	0	0	2	1	4	4	2	1	2	0	0	0
2	4	3	1	2	3	3	5	2	1	1	2	0	1	1	3	1	2	1	1	0	0	0	0	0	0	0	2	1	4	4	2	1	2	0	0	0
2	4	3	1	1	3	3	3	1	1	2	1	0	1	1	1	1	2	1	1	0	0	0	0	0	0	0	1	1	4	4	4	1	2	0	0	0
2	4	3	1	1	3	3	3	1	1	2	2	0	1	1	2	1	3	1	1	1	0	0	0	0	0	0	1	1	3	4	2	1	2	0	0	1
2	4	3	1	2	3	3	2	1	1	2	2	0	1	1	2	1	2	1	1	0	0	1	0	0	0	1	1	1	3	4	1	1	2	1	0	3
2	4	3	1	1	3	2	2	1	1	2	1	0	1	1	1	1	2	1	1	0	0	0	0	0	0	0	1	2	1	4	1	1	2	0	0	1
2	4	3	1	1	3	2	2	1	1	2	1	0	1	1	1	1	2	1	1	1	0	0	0	0	0	0	1	2	3	4	2	1	2	0	0	1
2	4	3	1	2	3	1	2	1	1	2	2	0	1	1	1	1	2	1	1	1	1	0	0	0	0	0	1	2	3	4	1	1	2	0	0	2
2	4	3	1	2	#NULL!	2	2	1	1	2	1	0	1	1	1	1	2	1	1	0	0	0	0	1	0	0	1	1	3	3	2	1	2	0	0	2
2	4	3	1	1	4	3	2	1	1	2	1	0	1	1	1	1	2	1	1	1	0	0	0	0	0	0	1	1	1	4	2	1	2	0	0	2
2	4	3	1	1	3	2	2	1	1	2	1	0	1	1	1	1	3	1	1	1	0	1	0	0	0	0	1	1	1	4	1	1	2	0	0	2
2	4	3	1	2	3	3	1	3	1	1	2	0	1	1	1	1	3	1	1	1	0	1	0	0	0	0	2	1	2	3	1	1	2	0	0	2
2	4	3	1	1	#NULL!	2	4	1	1	3	1	0	1	1	2	1	2	1	1	0	0	0	0	0	0	0	3	2	1	4	1	1	1	0	0	1
2	4	3	1	1	3	3	3	1	1	2	1	0	1	1	1	1	2	1	1	1	0	0	0	0	0	0	1	1	2	4	1	1	2	0	0	1
2	4	3	1	1	3	3	2	1	1	2	1	0	1	1	1	1	2	1	1	0	0	0	0	0	0	0	1	1	1	2	3	1	2	0	0	0
2	4	3	1	1	2	2	4	1	1	2	2	0	3	1	2	1	2	1	1	0	0	0	0	0	0	0	1	1	2	4	5	1	2	0	0	0
2	4	3	1	3	3	3	5	3	1	1	2	0	1	1	1	1	2	1	1	0	1	0	0	0	0	0	2	1	4	2	2	1	2	0	0	3
2	4	3	1	3	3	2	4	1	1	3	1	0	1	1	2	1	2	1	1	1	0	0	0	0	0	0	3	2	1	4	2	1	2	1	0	2
2	4	3	1	2	3	3	3	3	1	3	1	0	1	1	1	1	2	1	1	1	0	0	0	0	0	0	3	2	3	4	1	1	2	0	0	1
2	4	3	1	4	3	2	4	1	4	1	2	0	1	1	2	1	2	1	1	1	1	0	0	0	0	0	1	2	3	4	2	1	2	0	0	3
2	4	3	1	3	3	2	2	1	2	2	2	0	2	2	2	1	2	1	1	0	0	0	0	0	0	0	1	1	3	4	1	1	2	0	0	0
2	4	3	1	3	3	1	1	3	1	1	2	0	2	1	2	1	2	1	1	1	0	0	0	0	0	0	1	2	2	4	2	2	2	0	0	3
2	4	3	1	1	3	1	2	2	1	1	2	0	1	1	2	1	2	1	1	0	0	0	0	0	0	0	1	2	4	4	2	1	2	0	0	1
2	4	3	1	3	2	3	2	3	1	1	3	0	1	1	2	1	3	1	1	1	0	1	0	0	0	0	2	1	3	4	4	1	2	0	0	3
2	4	3	1	2	3	2	1	3	1	1	2	0	1	1	2	1	2	1	1	0	0	0	0	0	0	0	1	2	4	#NULL!	2	1	2	0	0	0
2	4	3	1	2	3	1	1	2	1	1	2	0	1	1	1	1	2	1	1	0	1	0	0	0	0	0	2	1	3	4	2	1	2	0	0	1
2	4	3	1	1	3	2	2	1	1	2	2	0	1	1	2	1	2	1	1	1	1	0	0	0	0	0	1	1	4	4	1	1	2	0	0	2
2	4	3	1	1	2	1	1	2	1	1	1	0	2	1	2	1	2	1	1	1	1	0	0	1	0	0	2	1	4	4	1	1	2	1	0	3
2	4	3	1	2	4	2	1	3	1	1	3	0	1	1	1	1	3	1	1	1	0	1	0	1	0	0	2	2	4	4	2	1	2	1	0	3
2	4	3	1	1	2	3	2	1	1	2	1	0	1	1	2	1	3	1	1	0	0	0	0	1	0	0	1	1	2	4	1	1	2	1	0	2
2	4	3	1	1	2	2	2	1	1	2	1	0	1	1	1	1	1	1	1	0	0	0	0	0	0	0	1	2	3	4	1	1	2	0	0	0
2	4	3	1	3	3	2	1	2	1	1	2	0	1	1	2	1	2	1	1	1	0	1	0	0	0	0	1	2	3	2	2	1	2	0	0	2
2	4	3	1	1	2	3	2	1	1	3	#NULL!	0	1	1	1	1	3	1	1	0	0	0	0	1	0	0	3	1	3	1	1	1	2	0	0	1
2	4	3	1	1	2	2	1	2	1	1	1	0	1	1	2	1	3	1	1	1	0	0	0	0	0	0	2	1	4	2	2	1	1	0	0	2
2	4	3	1	3	3	2	#NULL!	3	1	1	2	0	1	1	2	1	2	1	1	0	0	1	0	0	0	0	1	1	4	4	1	1	2	0	0	1
2	4	3	1	1	2	2	#NULL!	1	4	3	2	0	1	1	1	1	2	1	1	0	0	0	0	0	0	0	3	2	3	1	1	1	2	1	0	0
2	4	3	1	3	2	2	1	3	1	1	2	0	1	1	2	1	2	1	1	1	0	1	1	0	0	0	1	2	3	4	1	1	2	0	0	4
1	4	3	1	3	4	3	2	3	1	1	2	0	1	1	2	1	3	3	2	1	0	1	0	0	0	0	1	1	3	4	2	1	2	0	1	2
1	4	3	1	2	4	2	1	2	1	2	3	0	2	1	3	1	2	1	1	1	0	0	1	1	0	0	1	2	2	4	1	1	2	0	1	4
1	4	3	1	1	3	3	2	1	1	3	3	0	1	1	1	1	3	4	1	0	0	0	0	0	0	0	3	1	3	1	1	1	2	0	1	1
1	4	3	1	3	3	2	2	1	1	2	1	0	1	1	1	1	3	1	1	1	0	0	0	0	0	0	1	1	2	4	1	1	2	1	1	1
1	4	3	1	2	4	3	2	1	1	2	1	0	1	1	1	1	3	3	1	0	0	1	0	0	0	0	1	1	3	3	1	1	1	1	0	1
1	4	3	1	3	3	2	2	3	#NULL!	1	2	0	1	1	1	1	2	1	1	1	1	0	0	0	0	0	2	1	3	4	2	1	2	0	1	2
1	4	3	1	2	3	3	2	1	1	3	1	0	1	1	1	1	2	2	1	1	0	0	0	0	0	0	3	1	2	4	4	1	2	1	1	1
1	4	3	1	1	3	2	#NULL!	1	4	3	2	0	1	1	1	1	2	1	2	0	0	0	0	0	0	0	3	2	3	1	1	1	2	0	1	0
1	4	3	1	3	3	2	5	2	1	1	1	0	1	1	1	1	1	1	1	0	0	0	0	0	0	0	2	1	2	4	1	1	2	1	1	0
1	4	3	1	1	3	2	1	3	1	1	2	0	1	1	2	1	3	1	4	1	1	0	0	0	0	0	2	1	4	4	3	1	2	0	1	2
1	4	3	1	1	4	2	1	3	1	2	2	0	1	1	1	1	3	3	1	0	0	0	0	0	0	0	1	2	1	3	2	1	2	0	0	0
1	4	3	1	2	3	3	3	1	1	3	2	0	1	1	2	1	2	3	4	1	0	0	0	1	1	0	3	1	3	1	1	1	2	0	1	3
1	4	3	1	4	3	1	5	3	1	1	1	0	1	1	2	1	2	1	1	0	0	0	0	0	0	0	2	1	4	4	2	4	2	1	1	0
1	4	3	1	3	3	3	2	3	1	1	2	0	1	1	2	1	3	3	1	1	0	1	0	1	0	0	1	1	3	4	3	1	2	0	0	4
1	4	3	1	2	3	2	5	2	1	2	1	0	1	1	1	1	2	2	4	1	0	0	0	0	0	0	1	1	4	4	4	1	2	0	0	1
1	4	3	1	2	3	2	3	1	1	2	1	0	1	1	1	1	2	1	1	0	0	0	0	0	0	0	1	1	4	4	1	1	2	0	0	0
1	4	3	1	3	3	1	2	1	1	2	2	0	1	1	2	1	2	2	2	1	0	0	0	0	1	0	1	2	1	4	1	1	2	0	0	3
1	4	3	1	2	3	2	2	1	1	2	2	0	1	1	2	1	3	1	3	1	0	0	0	0	0	0	1	1	3	4	1	1	2	0	0	1
1	4	3	1	1	2	3	3	1	1	3	1	0	1	1	1	1	2	1	1	1	0	1	1	0	1	0	3	1	1	1	1	1	1	0	1	4
1	4	3	1	2	4	3	2	1	1	2	2	0	1	1	1	1	2	4	4	1	0	1	0	0	0	0	1	1	2	3	3	1	2	0	0	3
1	4	3	1	4	3	3	2	3	1	1	1	0	1	1	1	1	2	1	1	1	0	1	0	0	0	0	2	1	3	1	2	1	1	0	0	3
1	4	3	1	2	3	1	1	3	1	3	3	0	1	1	1	1	3	2	2	0	0	0	1	0	0	0	3	1	3	3	2	1	2	0	0	1
1	4	3	1	2	3	3	2	1	1	2	2	0	1	1	2	1	3	4	1	1	0	1	0	0	0	0	1	1	1	4	1	1	2	1	0	3
1	4	3	1	2	3	2	1	2	1	2	1	0	1	1	1	1	2	3	1	0	0	0	0	0	0	0	1	1	3	3	1	1	2	0	0	0
1	4	3	1	2	3	2	1	3	1	2	1	0	1	1	1	1	2	2	2	1	0	1	0	0	1	0	1	1	1	4	1	1	2	0	0	3
1	4	3	1	3	3	2	1	3	1	2	3	0	2	1	2	1	1	1	1	1	1	0	1	0	0	0	1	1	4	4	1	1	2	0	0	3
1	4	3	1	1	3	2	1	2	1	1	2	0	1	1	2	1	2	2	2	1	0	0	0	0	0	0	2	2	2	4	1	1	2	0	0	1
1	4	3	1	3	3	3	5	3	1	1	2	0	1	1	1	1	2	1	1	1	0	0	0	0	0	0	2	1	1	1	1	1	2	0	0	1
1	4	3	1	4	3	2	1	3	1	1	2	0	1	1	1	1	3	1	1	1	0	1	0	0	0	0	2	1	1	4	1	1	2	0	0	2
1	4	3	1	2	3	2	2	1	1	2	1	0	1	1	2	1	2	3	1	0	0	0	0	0	0	0	1	1	1	3	1	1	2	0	0	0
1	4	3	1	2	3	2	1	3	1	2	1	0	1	1	1	1	2	3	1	1	0	0	0	0	0	0	1	1	1	2	1	1	2	0	0	1
1	4	3	1	3	3	2	1	3	1	1	1	0	1	1	1	1	2	1	2	0	0	0	0	0	0	0	2	1	4	4	4	2	1	0	0	1
1	4	3	1	2	3	1	1	3	1	2	2	0	1	1	2	1	2	3	1	1	0	0	0	0	0	0	1	2	3	4	1	1	2	0	0	1
1	4	3	1	1	3	1	3	3	1	2	1	0	1	1	1	1	2	3	1	0	0	0	0	0	0	0	1	1	4	4	1	1	2	0	0	0
1	4	3	1	2	3	2	1	3	1	2	2	0	1	1	2	1	2	1	1	0	0	0	0	0	0	0	1	1	3	4	1	1	2	0	0	1
1	4	3	1	3	3	3	1	3	1	1	1	0	1	1	2	1	2	3	4	0	0	1	0	1	0	0	2	1	4	4	1	1	2	0	0	2
1	4	3	1	2	3	2	2	3	1	1	2	0	1	1	2	1	2	1	1	0	0	0	0	0	0	0	1	2	1	4	3	1	2	0	0	2
1	4	3	1	1	3	2	2	3	1	1	2	0	1	1	2	1	2	1	2	0	0	0	0	0	0	0	1	1	4	4	2	1	#NULL!	0	0	1
1	4	3	2	3	3	2	1	3	1	1	2	0	1	1	2	1	2	1	1	1	1	1	0	0	0	0	1	2	2	3	2	1	2	0	0	4
1	4	3	1	2	2	3	5	3	1	3	1	0	1	1	1	1	2	2	2	1	0	0	0	0	0	0	3	1	2	3	1	1	2	0	0	1
1	4	3	1	1	3	3	#NULL!	1	4	3	1	0	1	1	1	1	2	1	1	0	0	0	0	0	0	0	3	2	3	1	1	1	2	0	0	0
1	4	3	1	3	3	1	1	2	1	3	2	0	1	1	1	1	3	4	4	1	1	1	0	0	0	0	3	1	3	2	1	1	2	0	0	4
1	4	3	1	4	2	2	2	3	1	2	1	0	1	1	1	1	2	1	1	1	0	0	0	0	0	0	1	1	2	4	1	1	2	0	0	1
1	4	3	2	3	3	2	1	3	2	2	2	0	1	1	1	1	2	1	1	0	0	0	0	0	0	1	1	1	3	2	1	1	2	0	0	1
1	4	3	1	3	3	2	5	2	1	1	1	0	1	1	2	1	2	1	1	0	0	0	0	0	0	0	2	1	4	3	1	1	2	0	0	0
1	4	3	1	1	3	1	3	1	1	2	2	0	1	1	2	1	3	1	1	0	0	0	0	0	0	0	1	1	3	4	2	1	2	0	0	0
1	4	3	1	2	2	2	2	1	1	2	2	0	1	1	2	1	2	3	1	0	0	0	0	0	0	0	1	1	3	4	1	1	2	0	0	1
1	4	3	1	3	3	2	1	3	1	1	1	0	1	1	2	1	3	3	2	1	0	0	0	0	0	0	2	1	1	4	1	1	2	0	0	1
1	4	3	1	4	2	2	2	3	1	1	3	0	1	1	3	1	3	1	1	1	0	0	1	0	0	0	2	2	3	4	2	1	2	0	0	3
1	4	3	1	3	2	2	2	3	1	1	2	0	1	1	2	1	3	1	2	1	1	0	0	0	0	0	1	2	3	4	2	4	2	0	0	3
1	4	3	1	2	2	2	1	3	1	2	2	0	1	1	1	1	2	1	4	0	0	0	0	0	0	0	1	2	3	4	1	1	2	0	0	0
1	4	3	1	3	2	3	1	3	1	1	1	0	1	1	1	1	2	1	2	1	0	0	0	0	0	0	2	1	2	3	2	1	1	0	0	1
1	4	3	1	3	3	2	1	3	1	1	2	0	1	1	1	1	2	3	2	0	0	0	0	0	0	0	1	2	2	4	2	2	2	0	0	1
1	4	3	1	2	2	3	2	1	1	2	1	0	1	1	1	1	2	3	1	1	0	0	1	0	0	0	1	2	3	4	1	1	2	0	0	2
1	4	3	1	4	3	2	1	3	1	1	2	0	1	1	2	1	2	1	1	1	0	0	0	0	0	0	1	2	4	4	1	1	2	0	0	2
1	4	3	1	3	2	2	1	2	1	1	1	0	1	1	1	1	2	1	1	1	0	1	0	0	1	0	1	2	1	4	2	1	2	0	0	3
1	4	3	1	3	2	2	2	3	1	1	3	0	1	1	2	1	3	1	1	0	0	0	0	0	0	0	1	2	3	4	3	1	2	1	0	1
1	4	3	1	3	2	2	1	3	1	1	1	0	1	1	1	1	2	2	2	0	0	0	0	0	0	0	2	1	2	3	2	1	2	0	0	0
1	4	3	1	2	2	2	4	1	3	1	1	0	1	1	1	1	3	1	3	1	0	0	0	0	0	0	2	2	3	4	1	1	2	0	0	2
1	4	3	1	2	2	3	2	2	1	2	1	0	1	1	1	1	2	1	2	0	0	0	0	0	0	1	1	1	1	4	3	1	2	1	0	2
1	4	3	1	3	2	3	1	3	1	1	2	0	1	1	2	1	2	1	1	1	0	0	0	1	0	0	1	2	3	4	1	1	2	0	0	2
1	4	3	1	3	2	2	2	3	1	1	2	0	1	1	1	1	3	1	1	1	0	1	1	0	0	0	1	2	4	4	3	1	2	0	0	3
1	4	2	1	3	3	3	1	3	1	3	1	0	1	1	1	1	3	1	4	0	0	0	0	0	0	0	3	2	4	4	1	4	2	0	0	0
1	4	2	1	3	3	1	1	3	1	1	1	0	1	1	1	1	3	4	2	1	0	0	0	0	0	0	1	2	3	4	2	1	1	0	0	1
1	4	2	1	4	2	3	1	3	1	1	2	0	1	1	2	1	2	1	1	0	0	0	0	0	0	0	1	2	2	4	1	1	2	0	0	0
2	4	1	1	2	4	3	2	1	1	3	1	0	1	1	1	1	2	1	1	1	1	0	0	0	0	0	3	2	3	4	1	1	2	0	1	2
2	4	1	1	2	3	3	2	1	1	3	1	0	1	1	3	1	3	1	2	0	0	1	0	0	0	1	3	2	3	4	3	1	2	0	1	4
2	4	1	1	2	4	2	2	1	1	2	1	0	1	1	1	1	2	1	1	1	0	1	0	0	0	0	1	2	1	4	1	1	2	0	0	2
2	4	1	1	1	2	3	2	1	1	2	2	0	1	1	1	1	3	1	1	1	0	1	0	0	0	0	1	2	4	4	1	1	2	0	1	4
2	4	1	1	3	4	2	3	1	1	2	1	0	1	1	2	1	2	1	1	0	0	0	0	0	0	0	1	1	1	1	2	1	2	0	0	1
2	4	1	1	2	4	1	1	3	1	1	1	0	1	1	1	1	2	1	1	0	0	0	0	0	0	0	2	1	1	4	1	1	2	0	0	0
2	4	1	1	1	3	3	2	1	1	2	3	0	1	1	2	1	3	1	1	0	0	1	0	0	0	0	1	2	2	4	1	1	2	0	1	1
2	4	1	1	1	4	2	2	1	1	2	1	0	1	1	1	1	2	1	1	1	0	1	0	0	0	0	1	2	3	4	1	1	2	0	0	2
2	4	1	1	2	3	3	3	1	3	3	3	0	1	1	2	1	3	1	1	1	0	1	0	0	0	0	3	1	4	4	1	1	2	0	0	2
2	4	1	1	1	3	3	3	1	2	3	2	0	1	1	3	1	2	1	1	0	0	0	0	0	0	0	3	1	3	1	3	1	2	0	0	0
2	4	1	1	2	3	2	3	1	3	3	1	0	1	1	2	1	3	1	1	1	0	1	0	0	0	0	3	1	3	4	1	1	#NULL!	0	0	3
2	4	1	1	1	3	1	3	1	2	3	1	0	1	1	1	1	2	1	1	1	0	1	0	0	0	0	3	1	3	1	1	1	2	0	0	2
2	4	1	1	1	3	3	2	1	1	2	2	0	1	1	2	1	3	1	1	1	0	0	0	0	0	0	1	2	1	3	1	1	2	0	0	1
2	4	1	1	1	3	3	2	1	1	2	2	0	1	1	1	1	3	1	1	1	0	1	0	0	0	0	1	1	1	3	1	1	2	0	0	2
2	4	1	1	1	3	2	2	1	1	2	1	0	3	2	2	1	2	1	1	1	1	0	0	0	0	0	1	1	1	3	1	1	2	0	0	2
2	4	1	1	3	3	3	2	3	1	1	2	0	2	1	2	1	2	1	1	1	0	0	0	0	0	0	2	2	3	4	4	1	2	0	0	2
2	4	1	1	1	3	1	2	1	1	2	1	0	1	1	1	1	1	1	1	0	0	0	0	0	0	0	1	2	3	4	1	2	2	0	0	0
2	4	1	1	1	3	3	2	3	1	1	3	0	3	3	3	1	3	1	1	1	0	1	0	0	0	0	2	2	4	4	1	4	2	0	0	4
2	4	1	1	1	3	3	1	2	1	1	2	0	1	1	2	1	2	1	1	0	0	0	0	1	0	0	2	1	3	4	1	1	2	0	0	2
2	4	1	1	1	3	3	3	1	4	3	2	0	3	1	2	1	2	1	1	0	0	1	0	0	0	0	3	1	3	1	1	1	2	1	0	1
2	4	1	1	2	3	2	1	3	1	1	3	0	3	1	2	1	3	1	1	1	0	0	0	0	0	1	2	2	#NULL!	#NULL!	#NULL!	#NULL!	2	1	0	3
2	4	1	1	2	3	2	1	2	1	1	1	0	1	1	1	1	1	1	1	0	0	0	0	0	0	0	2	1	3	3	1	1	1	0	0	1
2	4	1	1	4	3	2	5	2	1	2	1	0	1	1	1	1	2	1	1	0	0	0	0	0	0	0	1	2	3	4	1	1	1	0	0	0
2	4	1	1	1	3	2	5	2	1	1	2	0	1	1	1	1	2	1	1	0	0	0	0	0	0	0	2	1	4	4	1	1	2	0	0	0
2	4	1	1	3	2	2	5	3	1	1	2	0	2	1	2	1	3	1	1	0	1	0	0	0	0	0	2	1	4	3	2	1	2	0	0	1
2	4	1	1	2	3	1	2	2	1	1	1	0	1	1	1	1	2	1	1	1	0	0	0	0	0	0	1	1	1	4	3	1	2	0	0	1
2	4	1	1	1	3	3	2	1	1	2	1	0	2	2	1	1	2	1	1	0	0	0	0	0	0	1	1	1	1	4	1	1	2	0	0	2
2	4	1	1	2	3	2	1	3	1	1	2	0	1	1	1	1	3	1	1	1	1	0	0	0	0	0	2	2	3	#NULL!	1	1	2	0	0	2
2	4	1	1	1	2	2	2	1	1	2	1	0	2	2	1	1	2	1	1	1	0	1	0	0	0	0	1	2	1	4	1	1	2	0	0	2
2	4	1	1	1	3	3	1	3	1	1	2	0	2	1	2	1	2	1	1	0	0	1	0	1	0	0	1	2	4	4	3	1	1	0	0	2
2	4	1	1	1	2	3	1	2	1	1	2	0	2	1	2	1	2	1	1	1	1	0	0	0	0	0	2	1	3	4	1	1	2	0	0	2
2	4	1	1	2	3	3	1	3	1	1	2	0	1	1	2	1	2	1	1	1	0	0	0	0	0	0	1	2	4	4	1	1	2	0	0	1
2	4	1	1	1	2	2	2	1	1	3	1	0	1	1	1	1	1	1	1	0	0	0	0	0	0	0	3	1	3	1	1	1	2	0	0	1
2	4	1	1	1	2	2	2	2	1	1	2	0	1	1	1	1	3	1	1	0	0	0	0	0	0	0	2	1	3	4	2	1	2	0	0	1
1	4	1	1	3	3	2	3	1	1	2	1	0	3	1	1	1	3	3	1	1	0	0	0	0	0	0	1	1	4	4	1	1	#NULL!	0	1	2
1	4	1	1	2	4	3	2	1	1	2	1	0	1	1	1	1	2	1	1	0	0	0	0	0	0	1	1	2	3	4	1	1	2	0	0	1
1	4	1	1	1	4	3	3	1	4	3	1	0	1	1	1	1	2	3	4	0	0	0	0	0	0	0	3	1	3	1	1	1	2	1	0	0
1	4	1	1	2	3	1	2	1	1	2	1	0	1	1	1	1	2	1	1	0	0	0	0	0	0	0	1	1	3	4	1	1	2	0	0	1
1	4	1	1	1	3	3	1	3	1	2	2	0	1	1	1	1	3	1	4	0	0	0	0	0	0	0	1	2	3	4	2	1	2	0	0	0
1	4	1	1	1	3	3	1	2	1	1	2	0	1	1	2	1	2	1	1	0	0	0	0	0	1	0	2	2	3	4	1	1	2	0	0	1
1	4	1	1	3	3	2	#NULL!	2	1	2	1	0	1	1	1	1	3	1	4	1	0	1	0	1	0	0	1	1	1	2	1	1	1	0	0	4
1	4	1	1	1	3	3	2	1	1	2	1	0	1	1	1	1	2	1	2	1	0	1	0	0	0	0	1	2	1	4	1	1	2	0	0	3
1	4	1	1	1	2	3	3	1	2	3	2	0	2	1	2	1	2	1	1	1	0	1	0	0	0	0	3	2	2	4	1	1	2	0	0	2
1	4	1	1	3	3	3	1	3	1	1	1	0	1	1	1	1	2	3	4	1	0	1	0	0	0	0	2	2	3	4	1	1	2	0	0	2
1	4	1	1	2	2	3	5	3	1	1	1	0	1	1	2	1	2	2	4	0	0	0	0	0	0	0	2	1	4	4	2	1	2	0	0	0
1	4	1	1	2	3	3	2	1	1	3	2	0	1	1	1	1	1	4	4	1	0	0	0	0	0	0	3	1	1	1	1	1	2	0	0	3
1	4	1	1	3	2	2	1	3	1	1	2	0	1	1	2	1	2	1	1	1	0	0	0	0	1	0	1	2	3	4	3	1	2	0	0	3
1	4	1	1	4	2	2	1	3	1	1	1	0	1	1	1	1	2	3	4	1	0	0	0	0	0	0	1	1	1	1	1	1	2	0	0	1
1	4	1	#NULL!	#NULL!	2	2	1	2	1	1	#NULL!	0	3	1	2	1	2	1	1	1	0	1	0	0	0	0	1	2	2	4	2	1	2	0	0	2
2	3	3	1	1	3	3	3	1	3	3	2	0	2	1	2	1	2	1	1	1	1	0	0	0	0	0	3	2	3	#NULL!	2	1	2	0	1	3
2	3	3	1	4	4	1	2	3	1	1	2	0	1	1	1	1	3	1	1	0	0	1	1	1	0	0	1	1	3	2	3	2	2	1	0	4
2	3	3	1	1	3	2	2	1	1	2	2	0	1	1	1	1	3	1	1	1	0	0	0	0	0	0	1	2	3	2	1	2	2	0	1	2
2	3	3	1	1	3	2	#NULL!	1	4	3	1	0	1	1	1	1	2	1	1	0	0	0	0	0	0	0	3	2	3	1	1	1	2	0	0	0
2	3	3	1	2	3	2	4	1	3	3	1	0	1	1	1	1	2	1	1	0	0	0	0	0	0	0	3	1	3	4	1	1	2	0	0	1
2	3	3	1	2	3	1	1	2	1	1	2	0	1	1	2	1	2	1	1	0	1	1	0	0	0	0	2	1	3	3	1	1	2	0	1	3
2	3	3	1	1	3	1	2	1	2	3	1	0	1	1	1	1	2	1	1	0	0	0	0	0	0	0	3	2	4	4	1	1	2	0	0	0
2	3	3	1	3	2	1	1	2	1	1	3	0	2	3	2	1	3	1	1	1	0	0	1	1	0	0	1	2	1	4	2	1	2	1	1	4
2	3	3	1	1	3	3	2	1	1	2	1	0	1	1	1	1	2	1	1	0	0	0	0	0	0	0	1	1	3	4	1	1	2	0	0	0
2	3	3	1	3	3	2	5	3	1	2	1	0	1	1	2	1	2	1	1	1	1	0	0	0	0	0	1	1	1	1	2	1	2	0	0	2
2	3	3	1	1	3	2	3	1	1	2	1	0	1	1	1	1	2	1	1	1	1	0	0	0	0	0	1	1	3	2	1	1	1	0	0	2
2	3	3	1	2	3	2	2	1	1	2	2	0	1	1	2	1	2	1	1	1	0	1	0	0	0	0	1	1	1	3	1	1	2	0	0	2
2	3	3	1	3	3	1	3	1	1	2	1	0	1	1	2	1	2	1	1	0	0	0	0	0	0	0	1	1	3	4	1	1	2	0	0	0
2	3	3	1	1	3	1	3	1	1	2	1	0	1	1	1	1	2	1	1	1	0	0	0	0	0	0	1	1	4	4	1	1	2	0	0	1
2	3	3	1	1	#NULL!	2	2	1	1	2	1	0	1	1	1	1	2	1	1	1	0	1	0	0	0	0	1	1	1	4	1	1	2	0	0	2
2	3	3	1	2	3	3	2	1	1	2	2	0	1	1	1	1	2	1	1	1	0	0	0	0	0	0	1	1	2	4	2	1	2	0	0	2
2	3	3	1	2	3	3	2	1	1	2	2	0	1	1	2	1	2	1	1	1	0	1	0	0	0	0	1	2	3	4	1	1	2	1	0	2
2	3	3	1	1	3	3	2	1	1	2	1	0	1	1	1	1	2	1	1	1	0	0	0	0	0	0	1	1	1	4	1	1	2	0	0	1
2	3	3	1	2	3	2	2	1	1	2	2	0	1	1	2	1	3	1	1	0	0	1	0	0	0	0	1	2	1	4	#NULL!	1	2	1	0	3
2	3	3	1	1	2	3	4	1	3	3	3	0	2	3	3	2	2	1	1	1	0	0	1	0	0	0	3	2	3	4	4	1	2	1	1	3
2	3	3	1	1	3	2	2	1	1	2	2	0	2	1	1	1	2	1	1	1	0	0	0	0	0	0	1	2	1	4	1	1	2	0	0	1
2	3	3	1	1	3	2	2	1	1	2	1	0	1	1	2	1	2	1	1	1	0	0	0	0	0	0	1	2	1	4	1	1	2	0	0	1
2	3	3	1	2	3	3	1	2	1	1	2	0	1	1	2	1	2	1	1	1	0	0	0	0	0	0	1	2	3	4	1	2	2	0	0	1
2	3	3	1	2	3	3	3	1	1	3	1	0	1	1	1	1	2	1	2	0	0	0	0	0	0	0	3	2	3	4	1	1	2	0	0	0
2	3	3	1	3	2	3	2	2	1	1	1	0	2	2	2	1	2	1	1	1	0	0	0	0	0	0	1	2	1	4	1	1	2	0	1	1
2	3	3	1	2	3	2	2	1	1	2	1	0	1	1	1	1	3	1	1	0	0	0	0	0	0	0	1	1	3	4	1	1	2	0	0	0
2	3	3	1	3	2	2	5	2	1	1	1	0	1	1	1	1	2	4	4	0	1	0	0	0	0	0	2	1	2	1	2	1	1	0	0	1
2	3	3	1	1	3	1	2	1	1	2	2	0	1	1	1	1	2	1	1	1	1	0	0	0	0	0	1	2	1	4	1	1	2	0	0	2
2	3	3	1	1	3	#NULL!	2	1	2	2	2	0	1	1	2	1	2	1	1	1	0	0	0	1	0	0	1	1	2	4	1	1	2	0	0	4
2	3	3	1	3	3	3	1	3	1	1	2	0	1	1	2	1	2	1	1	1	0	1	0	0	0	0	1	2	3	3	2	1	2	0	0	2
2	3	3	1	1	3	2	2	1	1	2	1	0	1	1	2	1	2	1	1	1	0	0	0	1	0	0	1	1	2	4	1	1	2	0	0	2
2	3	3	1	3	3	#NULL!	2	2	1	1	1	0	1	1	1	1	3	1	4	0	0	0	0	0	0	0	1	2	3	4	2	1	1	0	0	0
2	3	3	1	2	3	3	1	2	1	1	2	0	1	1	1	1	2	1	1	1	1	1	0	0	0	0	2	2	1	4	1	1	2	0	0	4
2	3	3	1	3	3	3	1	3	1	1	2	0	1	1	2	1	2	1	1	1	0	0	0	0	0	0	1	1	3	4	1	1	2	0	0	1
2	3	3	1	1	3	2	2	1	2	2	3	0	1	1	2	1	3	1	1	1	0	1	0	0	0	0	1	2	1	4	1	1	2	1	0	3
2	3	3	1	2	3	2	3	1	1	2	1	0	1	1	1	1	2	1	1	0	0	0	0	0	0	0	1	1	1	1	1	1	2	1	0	0
2	3	3	1	1	3	1	2	1	1	2	1	0	1	1	3	1	3	1	1	1	0	1	0	0	0	0	1	1	3	4	1	1	2	0	0	2
2	3	3	1	1	3	1	3	1	4	3	3	0	1	1	2	1	3	1	1	1	0	0	0	0	0	0	3	1	3	1	1	1	2	1	0	1
2	3	3	1	1	2	3	3	1	1	2	2	0	1	1	1	1	2	1	1	0	0	0	0	0	0	0	1	1	4	4	1	1	2	0	0	1
2	3	3	1	1	2	2	2	1	1	2	2	0	1	1	2	1	2	1	1	0	0	0	0	0	0	0	1	2	3	1	1	1	2	0	0	0
2	3	3	1	1	3	2	2	1	1	2	1	0	1	1	1	1	2	1	1	0	1	0	0	0	0	0	1	1	3	3	1	1	2	0	0	1
2	3	3	1	2	3	2	2	1	1	2	1	0	1	1	2	1	2	1	1	0	0	0	0	0	0	0	1	1	3	4	1	1	2	0	0	0
2	3	3	1	1	3	2	2	1	1	2	2	0	1	1	2	1	2	1	1	1	0	1	0	0	0	0	1	1	3	4	1	1	2	0	0	3
2	3	3	1	3	2	2	2	1	1	3	1	0	1	1	1	1	2	1	1	0	0	0	0	0	0	0	3	1	3	1	1	1	1	0	0	0
2	3	3	1	1	3	3	2	1	2	2	2	0	2	2	2	1	4	1	1	0	0	0	0	0	0	0	1	2	2	3	1	1	2	0	0	1
2	3	3	1	3	3	2	1	2	1	1	2	0	1	1	1	1	3	1	1	0	1	0	0	0	0	0	1	1	1	1	2	1	1	1	0	1
2	3	3	1	3	3	2	1	2	#NULL!	1	2	0	1	1	1	1	2	1	1	1	0	0	0	0	0	1	1	2	2	4	2	2	2	0	0	3
2	3	3	1	3	2	3	1	2	1	1	2	0	1	2	1	1	3	1	1	1	0	0	0	0	0	0	2	2	3	4	2	1	2	0	0	2
2	3	3	1	4	2	2	1	3	1	1	2	0	1	1	1	1	2	1	1	0	0	0	0	0	0	0	2	1	3	4	2	1	2	0	0	1
2	3	3	1	1	3	3	2	1	1	2	1	0	1	1	2	1	2	1	1	0	0	0	1	0	0	0	1	1	4	4	1	1	2	0	0	1
2	3	3	1	2	3	2	2	1	1	2	1	0	1	1	1	1	3	1	1	0	0	0	0	0	0	0	1	1	1	4	1	1	2	0	0	0
2	3	3	1	1	2	3	2	1	1	2	2	0	1	1	2	1	3	1	1	1	0	1	0	0	1	0	1	1	1	3	3	1	1	0	0	3
2	3	3	1	3	2	2	1	2	1	1	2	0	2	2	2	1	2	1	1	0	0	0	1	0	0	0	2	1	3	4	4	1	2	1	0	1
2	3	3	1	2	3	2	1	2	1	1	2	0	1	1	2	1	2	1	1	0	0	0	0	0	0	0	2	1	3	3	2	1	2	1	0	1
2	3	3	1	1	2	3	2	1	1	2	1	0	1	1	2	1	2	1	1	1	0	1	0	0	0	0	1	2	2	4	1	1	2	0	0	2
2	3	3	1	1	2	3	2	1	1	2	1	0	1	1	2	1	3	1	1	1	0	1	0	0	0	0	1	2	4	4	1	1	2	0	0	2
2	3	3	1	3	2	3	2	3	1	1	1	0	1	1	1	1	2	1	1	0	0	0	0	0	0	0	2	1	2	1	3	1	1	0	0	0
2	3	3	1	1	2	2	2	1	1	2	1	0	1	1	1	1	3	1	1	0	0	0	0	0	0	0	1	1	1	4	1	1	2	0	0	0
2	3	3	1	3	2	2	1	2	1	1	1	0	1	1	1	1	2	1	1	0	0	0	0	0	0	0	2	1	4	4	2	1	2	0	0	0
2	3	3	1	2	2	3	2	2	1	1	2	0	1	1	2	1	3	1	1	0	0	0	1	0	0	0	2	1	4	4	3	1	2	1	0	1
2	3	3	1	1	2	2	2	1	1	3	3	0	1	1	1	1	3	1	1	0	0	0	1	0	0	0	3	1	3	1	1	1	2	1	0	4
2	3	3	1	3	2	2	2	2	1	1	2	0	1	1	2	1	3	1	1	1	1	0	0	0	0	0	1	1	3	4	2	4	2	0	0	2
2	3	3	2	3	2	2	1	3	1	1	1	0	1	1	1	1	2	1	1	1	0	0	0	0	0	0	2	1	2	2	2	1	2	0	0	1
2	3	3	1	2	2	1	1	2	1	1	2	0	1	1	2	1	2	1	1	1	0	1	0	0	0	0	1	2	4	4	1	1	2	0	0	3
2	3	3	1	3	2	3	1	2	1	1	1	0	2	1	1	1	3	1	1	1	0	0	0	0	0	0	2	2	4	4	2	1	2	1	0	1
2	3	3	1	4	2	3	1	3	1	1	1	0	1	1	1	1	2	1	1	1	0	0	0	0	0	0	1	1	1	2	2	1	2	0	0	1
2	3	3	1	3	2	2	5	2	1	1	2	0	1	1	2	1	2	1	1	1	0	1	0	0	0	0	2	2	3	2	1	1	2	0	0	3
2	3	3	1	1	2	2	2	2	1	1	2	0	1	1	1	1	3	1	1	0	0	0	0	0	0	0	1	2	4	4	3	1	2	0	0	0
2	3	3	1	1	2	2	2	2	1	1	2	0	1	1	2	1	2	1	1	0	0	0	0	0	1	0	1	1	4	4	3	1	#NULL!	0	0	2
1	3	3	1	3	2	1	1	2	1	1	1	0	1	1	1	1	2	1	1	0	0	0	0	0	0	0	2	1	3	4	1	3	2	0	1	0
1	3	3	1	2	3	2	3	1	2	3	2	0	1	1	2	1	2	4	1	0	0	0	0	0	0	0	3	1	1	2	1	1	2	0	1	2
1	3	3	1	3	3	2	1	3	2	2	3	0	2	1	2	1	4	1	2	1	1	1	1	0	0	0	1	1	4	4	2	1	2	1	1	4
1	3	3	1	2	3	2	2	1	1	2	2	0	1	1	1	1	1	4	4	1	0	0	0	0	1	0	1	1	3	4	2	1	2	0	1	2
1	3	3	1	4	3	2	1	3	1	2	1	0	1	1	1	1	2	1	2	1	0	0	0	0	0	0	1	1	3	4	1	1	2	0	1	2
1	3	3	1	2	3	3	3	1	1	2	1	0	1	1	1	1	2	1	1	0	0	0	0	0	0	0	1	1	4	1	1	1	2	0	1	0
1	3	3	1	1	3	2	1	2	1	1	2	0	1	1	2	2	2	2	1	1	0	0	0	0	0	0	2	2	4	4	1	1	2	0	1	1
1	3	3	1	3	2	2	1	3	1	2	2	0	1	1	1	1	2	1	1	0	0	0	1	0	0	0	1	1	3	4	1	1	2	0	1	2
1	3	3	1	2	3	3	2	1	1	2	1	0	1	2	1	1	1	1	1	1	0	0	0	0	0	0	1	1	2	4	2	1	2	0	1	2
1	3	3	1	1	3	2	#NULL!	1	1	3	3	0	1	1	1	1	3	4	4	0	0	0	0	0	1	0	3	1	4	2	1	1	2	0	1	1
1	3	3	1	2	3	3	2	1	1	2	3	0	1	1	2	2	3	1	1	1	0	0	0	0	0	0	1	2	3	4	1	1	2	1	1	2
1	3	3	1	3	3	3	2	1	1	2	3	0	1	1	3	1	2	3	1	0	0	1	0	0	0	1	1	1	2	4	1	1	1	1	0	4
1	3	3	1	1	3	2	3	1	1	2	1	0	1	1	1	1	2	1	1	0	0	0	0	0	0	1	1	1	1	4	1	1	2	0	0	1
1	3	3	1	2	3	2	3	1	1	2	1	0	1	1	2	1	2	1	1	0	0	0	0	0	0	0	1	1	3	4	1	1	2	0	0	0
1	3	3	1	3	3	2	2	1	1	2	2	0	1	1	2	1	3	3	1	1	0	0	0	0	0	0	1	1	1	3	3	1	1	0	0	2
1	3	3	1	3	3	3	2	1	1	2	2	0	1	1	1	1	2	2	1	0	0	0	0	0	0	0	1	1	1	4	1	1	2	0	0	0
1	3	3	1	3	3	2	2	1	1	2	1	0	1	1	1	1	2	2	2	1	0	0	0	0	0	0	1	1	1	4	1	1	2	0	0	1
1	3	3	1	2	3	2	2	1	1	2	3	0	1	1	1	1	2	3	4	1	0	1	0	0	0	0	1	2	3	4	1	1	2	0	0	3
1	3	3	1	4	3	3	1	2	1	2	1	0	1	1	1	1	2	1	1	1	0	0	0	0	0	0	1	1	3	4	1	1	2	0	0	1
1	3	3	1	3	3	2	2	1	1	2	2	0	1	1	2	1	2	1	1	0	0	0	0	0	0	0	1	1	4	4	1	1	2	0	0	0
1	3	3	1	2	3	2	2	1	1	2	2	0	1	1	2	1	2	3	1	0	0	0	0	0	0	0	1	2	3	4	1	1	2	0	0	0
1	3	3	1	1	3	2	2	1	1	3	1	0	1	1	2	1	2	3	4	0	0	0	0	0	0	0	3	1	3	1	1	1	2	0	0	1
1	3	3	1	3	2	3	1	3	1	1	1	0	1	1	2	1	1	1	1	1	1	1	0	0	0	0	2	1	4	2	2	1	1	0	1	3
1	3	3	1	3	2	2	1	2	1	1	2	0	1	1	2	1	3	1	1	1	0	0	1	0	0	0	2	2	4	4	1	1	2	0	1	2
1	3	3	1	2	2	2	2	2	1	3	2	0	3	1	1	1	3	1	4	0	0	0	0	0	0	0	3	2	3	4	3	4	2	0	1	2
1	3	3	2	1	3	3	2	1	2	2	2	0	2	2	2	1	1	1	1	1	0	0	0	0	0	0	1	1	3	4	1	1	2	0	0	1
1	3	3	1	1	2	1	3	1	1	2	2	0	1	1	1	1	2	1	1	0	0	0	0	0	0	0	1	1	4	4	1	1	2	0	0	0
1	3	3	1	3	3	1	2	1	1	2	1	0	1	1	1	1	2	1	1	1	1	1	0	0	0	0	1	1	2	4	2	1	2	0	0	3
1	3	3	1	2	3	1	3	1	4	3	1	0	1	1	2	1	2	3	2	0	0	0	0	0	0	0	3	1	3	1	1	1	2	1	0	0
1	3	3	1	2	3	2	2	1	1	2	3	0	1	1	1	2	3	1	4	1	0	1	1	0	0	0	1	2	1	4	1	1	2	0	0	3
1	3	3	1	2	3	2	1	3	1	2	1	0	1	1	1	1	2	4	4	1	0	0	0	0	0	0	1	1	1	4	1	1	2	0	0	1
1	3	3	1	2	3	2	3	1	1	3	1	0	1	1	2	1	2	1	1	1	0	0	0	0	0	0	3	1	3	4	1	1	2	0	0	1
1	3	3	2	2	2	2	2	3	1	2	2	0	1	1	2	1	3	2	2	0	0	0	0	0	0	0	1	2	1	4	3	1	2	0	0	1
1	3	3	1	4	3	2	2	3	1	1	2	0	1	1	1	1	2	2	2	1	0	1	0	1	0	0	1	1	2	2	1	1	2	0	0	3
1	3	3	1	3	3	2	1	3	1	1	2	0	1	1	2	1	2	1	2	1	0	0	0	0	0	0	1	1	3	4	1	1	2	0	0	1
1	3	3	1	2	2	2	2	1	1	2	2	0	1	1	2	1	2	4	4	0	0	0	0	0	0	0	1	2	1	1	1	1	2	0	0	0
1	3	3	1	1	3	3	2	1	1	2	2	0	2	1	2	1	2	1	1	0	0	0	0	1	0	0	1	1	3	4	1	1	2	0	0	2
1	3	3	1	2	3	3	2	1	1	2	2	0	1	1	1	1	2	3	1	1	0	0	0	0	0	0	1	1	3	4	1	1	2	0	0	1
1	3	3	1	3	3	2	2	1	1	2	1	0	1	1	1	1	3	2	1	0	1	0	0	0	0	0	1	1	3	2	1	1	2	0	0	1
1	3	3	1	1	3	2	1	2	1	2	2	0	1	1	2	1	2	3	1	1	1	1	0	0	0	0	1	1	4	4	1	1	2	0	0	3
1	3	3	1	3	2	2	2	3	1	1	1	0	1	1	1	1	2	1	1	1	0	0	0	0	0	0	1	1	3	4	1	1	2	0	0	1
1	3	3	1	1	2	#NULL!	2	1	1	2	1	0	1	1	1	1	2	4	1	0	0	0	0	0	0	0	1	1	3	4	1	1	2	0	0	0
1	3	3	1	2	2	2	1	2	1	2	1	0	1	1	2	1	2	1	1	0	0	0	0	0	0	0	1	1	1	1	1	1	2	0	0	0
1	3	3	1	3	3	3	5	3	1	1	1	0	1	1	2	1	2	1	2	0	0	0	0	0	0	0	2	1	4	4	3	1	2	0	0	0
1	3	3	1	3	2	2	1	3	1	1	1	0	1	1	1	1	3	4	3	0	0	0	0	0	0	0	2	1	3	3	3	1	2	0	0	0
1	3	3	1	3	2	2	1	3	1	1	2	0	2	1	2	1	2	1	1	0	0	1	0	0	0	0	2	1	3	4	3	1	2	0	0	1
1	3	3	1	3	3	2	2	1	1	2	1	0	1	1	2	1	2	2	2	1	0	0	0	0	0	0	1	2	1	4	1	1	2	0	0	1
1	3	3	1	3	3	2	1	3	1	3	1	0	1	1	1	1	2	1	2	1	0	0	0	0	0	0	3	1	3	2	3	4	2	0	0	1
1	3	3	1	3	2	3	2	3	1	1	2	0	1	1	1	1	3	4	4	0	0	1	0	0	0	0	2	1	4	2	2	1	2	0	0	1
1	3	3	1	1	2	2	2	1	1	2	1	0	1	1	1	1	1	2	4	0	0	0	0	0	0	0	1	1	1	3	2	1	2	0	0	0
1	3	3	1	3	3	1	1	3	1	1	1	0	1	1	2	1	2	1	2	0	0	0	0	0	0	0	1	2	3	4	1	4	2	1	0	0
1	3	3	1	3	2	3	1	3	1	2	1	0	1	1	1	1	2	1	1	0	0	0	0	0	0	0	1	1	2	4	1	1	2	0	0	0
1	3	3	1	4	2	3	1	3	1	3	1	0	1	1	1	1	2	3	1	0	1	0	0	0	0	0	3	1	3	1	2	1	2	0	0	1
1	3	3	1	2	2	2	1	3	1	2	2	0	1	1	1	1	2	1	1	0	0	1	0	0	0	0	1	2	3	2	1	1	1	0	0	1
1	3	3	1	2	2	2	1	2	1	2	1	0	1	1	1	1	2	1	2	0	0	0	0	0	0	0	1	1	2	2	2	1	2	0	0	2
1	3	3	1	3	2	2	1	3	1	1	1	0	1	1	1	1	2	1	4	1	0	0	0	0	0	0	1	2	2	2	1	1	1	0	0	1
1	3	3	2	1	2	1	2	3	1	1	1	0	1	1	2	1	2	1	2	0	0	0	0	0	0	0	1	1	3	1	2	1	1	0	0	0
1	3	3	1	3	3	2	1	2	1	1	1	0	1	1	1	1	2	1	1	1	0	0	0	1	0	0	1	2	1	2	1	1	2	0	0	2
1	3	3	1	3	2	2	5	3	1	2	2	0	1	1	1	1	2	3	2	1	0	0	0	0	0	0	1	1	1	4	1	1	2	0	0	1
1	3	3	1	3	2	2	5	3	1	2	2	0	1	1	1	1	2	3	1	0	0	0	0	0	0	0	1	1	1	4	1	1	2	0	0	0
1	3	3	1	4	2	2	1	3	1	1	2	0	1	1	2	1	2	1	1	1	0	1	0	0	0	0	1	2	4	4	2	1	2	0	0	2
1	3	3	1	3	2	1	2	3	1	1	1	0	1	1	2	1	2	1	1	0	1	0	0	0	0	0	1	1	4	2	3	1	2	0	0	1
1	3	3	1	3	2	3	2	3	1	2	3	0	1	1	2	1	2	3	1	0	0	0	0	0	0	0	1	1	1	4	1	1	2	0	0	0
1	3	3	1	2	2	3	2	1	1	2	1	0	1	1	1	1	2	3	4	1	0	0	0	0	0	0	1	1	1	4	1	1	2	0	0	1
1	3	3	1	3	2	2	1	3	1	1	1	0	1	1	1	1	2	1	1	0	0	0	0	0	0	0	2	1	3	4	1	1	2	0	0	0
1	3	3	1	2	2	2	2	3	1	1	1	0	1	1	1	1	2	1	1	1	0	0	0	0	0	0	1	2	4	2	2	1	2	0	0	1
2	3	2	1	4	2	2	2	3	1	1	2	0	1	1	1	1	2	1	1	1	0	0	0	0	1	0	1	1	3	4	2	1	1	1	1	4
2	3	2	1	2	2	3	2	3	1	1	1	0	1	1	1	1	2	1	1	1	0	0	0	0	0	0	1	2	4	2	2	1	2	0	0	1
1	3	2	2	2	2	3	2	3	1	1	2	0	2	1	2	1	2	3	4	1	0	0	1	0	0	0	1	1	1	4	5	1	2	0	0	2
2	3	1	1	1	2	1	2	1	1	2	1	0	1	1	2	1	2	1	1	0	0	0	0	0	0	0	1	2	3	4	1	1	2	1	1	0
2	3	1	1	1	4	3	2	1	1	2	2	0	1	1	2	1	2	1	1	1	0	0	0	1	0	0	1	2	2	4	1	1	2	0	0	2
2	3	1	1	3	2	2	1	2	1	1	2	0	2	2	2	1	3	4	4	0	0	1	0	0	1	0	2	1	4	4	1	3	2	0	1	2
2	3	1	1	1	3	2	2	1	4	1	2	0	1	1	1	1	3	1	1	1	1	0	0	0	0	0	2	2	2	4	1	1	2	1	0	2
2	3	1	1	3	3	1	2	3	1	1	3	0	1	1	2	1	3	1	1	0	0	0	0	0	0	0	2	2	3	2	1	1	2	1	1	2
2	3	1	1	1	3	2	2	1	1	2	1	0	2	1	2	1	2	1	1	1	0	1	0	0	0	0	1	1	3	4	2	1	2	0	0	3
2	3	1	1	2	3	2	2	2	1	1	1	0	1	1	1	1	2	1	1	0	0	0	0	0	0	0	2	1	4	4	1	1	2	0	0	0
2	3	1	2	3	3	2	1	2	1	1	1	0	1	1	2	1	1	1	1	0	0	0	0	1	0	1	2	1	3	2	1	1	1	0	0	2
2	3	1	1	3	3	2	1	3	1	1	1	0	1	1	1	1	2	1	1	1	1	0	0	0	0	0	2	1	1	1	1	1	2	0	0	2
2	3	1	1	1	2	2	3	1	3	3	2	0	1	1	2	1	2	1	1	1	0	0	0	0	0	0	3	1	3	4	1	4	2	0	0	1
2	3	1	1	3	2	2	5	3	1	1	2	0	1	1	1	1	2	2	2	1	0	0	0	0	0	0	2	1	3	4	1	2	2	0	0	1
2	3	1	1	1	3	2	2	1	1	2	2	0	2	1	2	1	3	1	1	0	0	1	0	0	0	0	1	1	4	4	1	1	2	0	0	1
2	3	1	1	1	3	#NULL!	2	1	3	2	3	0	1	1	2	1	4	1	1	0	0	0	0	0	0	0	1	2	1	4	1	1	2	0	0	1
2	3	1	1	1	3	2	1	2	1	1	2	0	1	1	1	1	2	1	1	1	0	0	1	0	0	0	2	1	2	4	1	1	2	0	0	2
2	3	1	1	3	1	3	1	2	1	1	2	0	1	1	1	1	3	1	1	1	0	0	0	0	0	0	2	2	4	2	#NULL!	1	2	0	0	2
2	3	1	1	4	2	3	1	2	1	1	1	0	1	1	1	1	2	1	1	0	0	0	0	0	0	0	2	1	2	3	1	1	2	0	0	0
2	3	1	1	3	2	2	1	2	1	1	1	0	1	1	2	1	2	1	2	0	0	0	0	0	0	0	2	1	2	3	1	1	2	0	0	0
2	3	1	1	2	2	1	1	2	1	1	1	0	1	1	1	1	2	1	1	0	0	1	0	0	0	0	2	1	3	4	1	1	2	0	0	1
2	3	1	1	1	3	3	2	1	1	3	3	0	1	1	2	1	3	1	1	0	0	0	1	0	0	0	3	1	3	1	1	1	2	0	0	4
2	3	1	1	3	3	1	1	2	1	1	1	0	2	2	2	1	2	1	1	0	1	0	0	0	0	0	2	1	3	3	2	1	2	0	0	1
2	3	1	1	2	2	2	1	2	1	1	2	0	2	1	2	1	3	1	1	1	1	0	1	0	0	0	2	2	4	4	1	1	2	0	0	3
2	3	1	1	4	2	2	1	3	1	1	2	0	1	1	1	1	3	1	1	1	0	0	0	0	0	0	1	1	4	1	1	1	2	0	0	3
2	3	1	1	2	2	2	1	2	1	1	2	0	1	1	2	1	2	1	1	1	0	0	0	0	0	0	1	2	3	4	2	1	2	0	0	1
2	3	1	1	3	2	3	5	2	1	1	1	0	1	1	1	1	2	1	2	0	0	0	0	0	0	0	2	1	1	1	2	1	1	0	0	0
2	3	1	1	1	2	1	2	1	1	2	1	0	1	1	1	1	2	1	1	1	0	0	0	0	0	0	1	2	1	4	1	1	2	0	0	1
2	3	1	1	2	2	3	1	2	1	1	1	0	1	1	2	1	3	1	1	0	0	0	0	0	0	0	2	2	2	4	1	1	2	0	0	0
2	3	1	1	3	2	2	1	2	1	1	2	0	2	1	1	1	2	1	1	1	0	0	0	0	0	0	1	1	3	1	1	2	2	0	0	1
2	3	1	1	3	2	2	1	2	1	1	2	0	1	1	2	1	2	1	1	1	0	1	0	0	0	0	1	2	4	4	5	1	2	1	0	4
1	3	1	1	3	3	2	2	1	1	2	1	0	1	1	1	1	2	1	1	1	1	0	0	0	1	0	1	1	2	1	1	1	2	0	0	3
1	3	1	1	1	3	3	1	2	1	1	2	0	1	1	1	1	1	1	1	0	0	0	0	0	0	0	2	1	3	4	1	1	2	0	0	1
1	3	1	1	1	3	2	2	1	1	2	2	0	1	1	1	1	3	1	1	1	0	0	0	0	0	0	1	1	1	4	1	1	2	0	0	1
1	3	1	1	3	2	3	3	1	2	3	1	0	1	1	2	1	2	2	1	0	0	0	0	0	0	0	3	2	3	4	1	1	2	0	0	0
1	3	1	1	#NULL!	2	2	3	1	1	3	1	0	1	1	1	1	2	1	1	1	0	0	0	0	0	0	3	1	3	1	1	1	1	0	0	1
1	3	1	1	3	3	3	1	3	1	1	1	0	1	1	1	1	2	3	4	0	0	0	0	0	0	0	2	1	4	4	1	1	2	0	0	0
1	3	1	1	2	2	3	2	1	1	3	2	0	1	1	1	1	2	4	1	1	0	0	0	0	0	0	3	1	4	1	1	1	2	0	0	1
1	3	1	1	1	2	2	2	1	1	2	1	0	1	1	1	1	2	1	1	0	0	0	0	0	0	0	1	1	3	4	1	1	2	0	0	0
2	2	3	1	1	2	3	3	1	1	2	3	0	1	1	1	1	3	1	1	1	1	0	0	0	0	0	1	1	3	1	1	1	2	0	1	2
2	2	3	1	2	3	2	2	1	1	2	2	0	1	1	1	1	1	1	1	1	0	1	0	0	0	0	1	1	2	4	1	1	2	0	1	2
2	2	3	1	1	3	2	2	1	1	2	1	0	1	1	1	1	1	1	1	1	0	0	1	0	0	0	1	1	4	1	1	1	1	0	1	2
2	2	3	1	1	4	2	2	1	1	2	1	0	1	1	1	1	3	1	1	1	0	1	0	1	0	0	1	1	3	3	1	1	2	0	0	4
2	2	3	1	1	3	3	3	1	1	3	3	0	1	1	2	1	3	1	1	0	0	1	0	0	0	0	3	1	3	1	1	1	2	0	1	3
2	2	3	1	1	3	3	2	1	1	2	3	0	1	1	2	1	3	1	1	1	0	1	0	0	0	1	1	1	3	4	1	1	2	0	1	3
2	2	3	1	3	3	2	2	1	1	2	1	0	1	1	1	1	2	1	1	0	0	0	0	1	0	0	1	1	3	4	1	1	1	0	1	1
2	2	3	1	1	3	3	1	1	1	1	2	0	1	1	2	1	2	1	1	1	0	0	0	0	0	0	2	1	4	4	1	1	2	0	1	3
2	2	3	1	2	3	2	2	1	1	2	3	0	1	1	2	1	3	1	1	1	1	1	0	0	0	0	1	1	3	4	1	1	2	0	1	4
2	2	3	1	3	2	2	3	1	4	3	3	0	1	1	2	1	2	1	1	1	0	0	0	0	0	0	3	1	3	1	1	1	2	0	1	2
2	2	3	1	2	3	2	2	1	2	2	2	0	2	1	2	1	2	1	1	1	0	0	0	0	0	0	1	2	4	4	1	1	1	0	0	1
2	2	3	1	2	3	1	3	1	1	2	2	0	1	1	1	1	2	1	1	1	0	0	0	0	0	0	1	2	1	4	1	1	2	0	0	1
2	2	3	1	3	3	1	3	1	1	2	1	0	1	1	2	1	2	1	1	1	0	0	0	0	0	0	1	1	1	1	2	1	2	0	0	1
2	2	3	1	2	2	3	1	2	1	1	2	0	1	1	2	1	3	1	1	0	0	0	0	0	0	0	2	2	3	4	1	1	2	0	1	0
2	2	3	1	4	2	2	5	3	1	1	2	0	2	2	1	1	3	1	1	1	0	1	0	0	1	1	2	1	2	3	3	1	2	1	1	4
2	2	3	1	2	2	1	2	1	1	2	1	0	1	1	1	1	2	1	1	1	0	0	0	0	0	0	1	2	1	4	1	1	2	0	0	1
2	2	3	1	1	3	2	2	1	1	2	1	0	1	1	1	1	2	1	1	1	0	1	0	0	0	0	1	1	1	4	1	1	2	0	0	2
2	2	3	1	2	3	2	2	1	1	2	1	0	1	1	1	1	2	1	1	1	0	0	0	0	0	0	1	2	3	4	1	1	2	0	0	1
2	2	3	1	3	2	3	2	3	#NULL!	1	2	0	1	1	1	1	2	1	1	1	0	0	0	1	0	1	2	1	2	1	1	1	1	1	1	4
2	2	3	1	3	3	3	1	3	1	2	1	0	1	1	1	1	2	1	1	1	0	0	0	0	0	0	1	1	3	2	1	1	2	0	0	1
2	2	3	1	2	3	2	2	1	1	2	2	0	1	1	2	1	2	1	1	0	1	1	0	0	0	0	1	2	3	4	1	1	2	0	0	3
2	2	3	1	1	3	2	2	1	1	2	2	0	1	1	1	1	3	1	1	0	1	1	0	0	0	0	1	1	1	4	1	1	2	0	0	2
2	2	3	1	1	3	1	2	1	1	2	2	0	1	1	1	1	2	1	1	0	1	0	0	0	0	0	1	2	3	4	1	1	2	0	0	1
2	2	3	1	2	3	1	2	1	1	2	1	0	1	1	1	1	2	1	1	1	1	0	0	0	0	0	1	2	3	4	1	1	2	0	0	2
2	2	3	1	3	2	2	1	2	1	1	2	0	1	1	1	1	3	1	1	0	0	0	1	0	0	0	2	1	4	4	4	4	2	0	1	2
2	2	3	1	2	2	2	2	1	3	1	1	0	1	1	1	1	2	1	1	0	0	0	0	0	0	0	2	1	2	2	1	1	2	0	0	0
2	2	3	1	1	3	3	2	1	1	2	1	0	1	1	1	1	2	1	1	1	0	0	0	0	0	0	1	1	3	4	2	1	2	0	0	1
2	2	3	1	3	3	2	2	2	1	2	1	0	1	1	1	1	2	1	1	1	1	1	0	0	0	0	1	1	2	4	2	1	1	0	0	3
2	2	3	1	1	3	2	2	1	4	3	2	0	1	1	1	1	2	1	1	0	0	0	0	0	0	0	3	1	1	1	1	1	2	1	0	1
2	2	3	1	2	2	3	3	1	3	3	1	0	1	1	2	1	2	1	1	1	0	0	0	1	1	0	3	1	2	2	2	1	1	0	0	3
2	2	3	1	3	2	2	2	1	2	3	1	0	1	1	1	1	2	1	1	0	0	0	0	0	0	0	3	1	3	4	1	1	2	0	0	0
2	2	3	1	1	3	2	2	1	1	2	1	0	1	1	1	1	2	1	1	1	0	0	0	0	0	0	1	1	1	4	1	1	2	0	0	1
2	2	3	1	1	3	2	2	1	1	2	1	0	2	1	2	1	2	1	1	1	0	0	0	0	0	0	1	1	3	4	1	1	2	0	0	1
2	2	3	1	1	3	2	2	1	1	2	2	0	1	1	1	1	2	1	1	0	0	0	0	0	0	0	1	1	3	4	1	1	2	0	0	1
2	2	3	1	3	3	1	2	1	1	2	3	0	1	1	2	1	2	1	1	1	0	0	0	0	0	0	1	1	1	4	2	1	2	0	0	2
2	2	3	1	2	2	3	3	1	2	3	1	0	1	1	2	1	3	1	1	0	1	0	0	0	0	0	3	2	3	4	2	1	2	0	0	1
2	2	3	1	1	2	2	3	1	1	2	1	0	1	1	1	1	2	1	1	0	0	0	0	0	0	0	1	1	2	4	1	1	2	0	0	0
2	2	3	1	3	3	2	2	1	2	2	2	0	1	1	1	1	2	1	1	0	0	0	0	0	1	0	1	2	3	4	2	1	2	0	0	1
2	2	3	1	1	2	3	2	1	2	2	2	0	1	1	2	1	2	1	1	1	0	0	0	0	0	0	1	1	3	4	1	1	2	0	0	1
2	2	3	1	2	3	2	2	2	1	1	2	0	1	1	1	1	2	1	1	1	1	1	0	1	0	0	1	2	2	4	1	1	2	0	0	4
2	2	3	1	2	3	1	2	1	1	2	2	0	2	1	2	1	2	1	1	1	1	0	0	0	0	0	1	1	4	4	1	1	2	1	0	2
2	2	3	1	2	2	2	2	1	1	2	1	0	1	1	1	1	2	1	1	1	0	1	0	0	1	1	1	1	1	4	1	1	2	0	0	4
2	2	3	1	1	2	2	2	1	1	2	1	0	1	1	1	1	2	1	1	0	0	0	0	0	0	0	1	1	3	4	3	1	2	0	0	0
2	2	3	1	1	2	2	2	1	1	2	2	0	1	1	2	1	2	1	1	1	0	0	0	0	0	0	1	1	1	1	1	1	2	0	0	3
2	2	3	1	3	3	2	2	1	2	2	3	0	1	1	2	1	3	1	1	1	0	1	0	0	0	0	1	2	1	4	3	1	2	1	0	4
2	2	3	1	1	3	1	2	1	1	2	1	0	1	1	1	1	2	1	1	0	0	0	0	0	0	0	1	1	3	4	2	1	2	0	0	0
2	2	3	1	3	2	2	2	1	1	2	1	0	1	1	3	1	2	1	1	0	0	0	0	1	0	0	1	1	1	1	1	1	1	0	0	1
2	2	3	1	2	2	2	2	1	1	2	2	0	1	1	2	1	2	1	1	1	0	0	0	0	0	0	1	2	1	1	1	1	2	0	0	1
2	2	3	1	2	2	2	2	1	1	2	2	0	1	1	1	1	2	1	1	0	0	0	0	0	0	1	1	1	3	3	1	1	1	0	0	2
2	2	3	1	2	2	1	2	1	1	2	1	0	1	1	1	1	3	1	1	0	0	0	0	0	0	0	1	1	3	1	3	1	1	0	0	0
2	2	3	1	2	3	3	2	1	1	2	1	0	1	1	2	1	2	1	1	1	0	1	0	0	0	0	1	2	1	4	1	1	2	0	0	3
2	2	3	1	1	3	1	1	2	1	1	2	0	1	1	2	1	3	1	1	1	0	1	0	1	0	0	2	1	3	4	1	1	2	0	0	4
2	2	3	1	1	2	2	2	1	1	2	2	0	1	1	1	1	2	1	1	0	0	0	0	1	0	0	1	1	1	4	1	1	2	0	0	2
2	2	3	1	2	2	2	2	1	1	2	1	0	1	1	1	1	2	1	1	0	1	0	0	0	0	0	1	1	2	2	3	1	1	0	0	1
2	2	3	1	3	2	1	2	2	1	1	3	0	1	1	1	1	3	1	1	1	0	1	0	0	0	0	2	1	3	4	2	1	2	0	0	2
2	2	3	1	1	3	1	#NULL!	1	2	3	2	0	1	1	2	1	2	1	1	1	0	0	0	0	0	0	3	2	3	4	2	4	2	0	0	1
2	2	3	1	3	2	2	2	3	1	1	3	0	2	2	2	1	3	1	4	0	1	1	0	1	1	1	2	2	3	3	2	2	1	1	0	4
2	2	3	1	3	3	2	1	3	1	1	2	0	2	1	2	1	3	1	1	1	0	1	0	0	0	0	2	1	2	4	3	1	2	1	0	3
2	2	3	1	1	3	2	3	1	4	3	1	0	1	1	3	1	2	1	1	0	0	0	0	0	0	0	3	2	4	4	1	1	2	0	0	0
2	2	3	1	3	2	3	1	3	1	2	1	0	1	1	1	1	2	1	1	0	0	0	0	0	0	0	1	1	3	4	1	1	2	0	0	0
2	2	3	1	3	2	1	1	2	1	1	2	0	1	1	1	1	2	1	1	1	0	0	0	0	0	0	2	1	3	3	1	1	2	0	0	1
2	2	3	1	3	2	2	1	2	1	1	2	0	1	1	1	1	3	1	1	0	0	1	1	0	0	0	2	2	2	4	1	4	2	0	0	3
2	2	3	1	3	2	2	1	2	1	1	1	0	1	1	1	1	2	1	1	1	0	0	0	0	0	0	2	1	2	3	2	1	2	0	0	2
2	2	3	1	2	2	3	3	1	3	3	1	0	1	1	1	1	2	1	1	0	0	0	0	0	0	0	3	2	3	4	2	1	2	0	0	1
2	2	3	1	3	2	2	1	2	1	1	2	0	1	1	1	1	3	1	1	1	0	1	0	0	0	0	1	2	3	1	1	1	1	1	0	2
2	2	3	1	3	2	2	5	2	#NULL!	1	1	0	1	1	1	1	2	1	1	0	0	0	0	0	0	0	2	1	3	4	1	1	1	0	0	0
2	2	3	1	1	2	2	4	1	1	3	1	0	1	1	2	1	2	1	1	0	0	0	0	0	0	0	3	2	2	1	1	1	2	0	0	0
2	2	3	1	3	2	2	3	1	1	3	1	0	1	1	3	1	1	1	1	0	0	0	0	0	0	0	3	2	3	4	2	1	2	1	0	0
2	2	3	1	3	2	1	1	3	1	1	1	0	1	1	1	1	2	1	1	0	0	0	0	0	0	0	2	1	4	1	3	1	1	1	0	0
2	2	3	1	1	3	2	1	2	1	1	2	0	1	1	3	1	3	1	1	1	0	0	0	0	0	0	2	1	3	4	5	1	2	0	0	2
2	2	3	1	1	2	3	2	1	1	2	1	0	1	1	2	1	2	1	1	0	0	0	0	0	0	0	1	2	1	4	1	1	2	0	0	0
2	2	3	1	1	2	3	2	1	1	2	1	0	1	1	1	1	2	1	1	1	0	0	0	0	0	0	1	1	3	4	1	1	2	0	0	1
2	2	3	1	4	2	3	2	3	1	1	2	0	1	1	1	1	2	1	1	0	0	0	0	0	0	0	2	1	3	1	1	1	1	0	0	0
2	2	3	1	1	2	3	1	1	1	2	1	0	1	1	1	1	2	1	1	1	0	0	0	0	0	0	1	1	4	4	2	1	2	0	0	1
2	2	3	1	2	2	2	2	1	1	2	2	0	1	1	1	1	2	1	1	0	0	0	0	0	0	0	1	1	3	3	1	1	1	0	0	0
2	2	3	1	3	2	2	2	1	1	2	1	0	1	1	3	1	2	1	1	0	0	0	0	0	0	0	1	1	1	1	1	1	2	0	0	0
2	2	3	1	3	2	2	1	2	1	1	1	0	1	1	1	1	2	1	1	1	0	0	0	0	0	0	1	2	1	4	2	1	2	0	0	1
2	2	3	1	3	2	2	1	2	1	1	2	0	1	1	2	1	2	1	1	1	0	1	0	0	0	0	1	2	3	4	2	1	2	0	0	2
2	2	3	1	4	2	3	1	3	1	1	2	0	1	1	1	1	4	1	1	1	0	1	0	0	0	0	1	2	3	3	1	2	2	0	0	2
2	2	3	1	1	2	2	3	1	1	2	2	0	1	1	1	1	2	1	1	1	0	0	0	0	0	0	1	1	2	2	1	1	2	1	0	1
2	2	3	1	3	2	2	3	1	1	3	1	0	1	1	2	1	2	1	1	0	0	0	0	0	0	0	3	1	3	4	1	1	2	0	0	0
2	2	3	1	2	2	3	2	1	1	2	3	0	1	1	2	1	3	1	1	0	1	0	0	0	0	0	1	1	2	4	1	1	2	1	0	2
2	2	3	1	2	2	2	1	#NULL!	1	2	1	0	1	1	1	1	2	1	1	1	0	0	0	0	0	0	1	2	2	2	1	1	1	0	0	2
2	2	3	1	2	2	2	1	2	1	1	2	0	1	1	1	1	2	1	1	0	0	0	0	1	0	0	2	1	2	4	1	1	2	0	0	2
2	2	3	1	3	2	3	1	3	1	1	2	0	1	1	2	1	2	1	1	0	0	0	0	0	1	0	1	1	3	4	2	1	2	0	0	2
2	2	3	1	1	2	3	2	1	1	3	3	0	2	1	3	1	3	1	1	1	1	1	0	0	0	1	3	1	3	1	3	1	2	1	0	4
2	2	3	1	3	2	2	5	2	1	1	2	0	1	1	2	1	2	1	1	0	0	0	0	0	0	0	2	2	4	4	1	1	2	0	0	1
2	2	3	1	2	2	2	3	1	1	3	1	0	3	2	1	1	1	1	1	0	0	0	0	0	0	0	3	1	2	4	2	1	2	0	0	0
2	2	3	1	2	2	2	2	1	1	2	1	0	1	1	2	1	2	1	1	0	0	1	0	0	0	0	1	2	1	1	1	1	2	0	0	3
2	2	3	1	4	2	2	2	3	1	1	2	0	1	1	1	1	2	1	1	1	0	0	0	0	0	0	1	1	2	2	2	2	2	0	0	2
2	2	3	1	3	2	2	2	3	1	1	1	0	1	1	1	1	2	1	1	0	0	0	0	0	0	0	1	1	2	4	2	2	1	0	0	0
1	2	3	1	2	2	2	2	1	1	2	1	0	1	1	2	1	3	2	2	1	0	0	0	0	0	0	1	2	1	4	1	1	2	0	1	4
1	2	3	1	3	3	2	2	1	4	3	1	0	1	1	1	1	2	1	1	0	0	0	0	0	0	0	3	1	1	1	1	1	2	1	1	1
1	2	3	1	2	3	3	2	1	1	2	1	0	1	1	1	1	2	1	1	0	0	1	0	0	0	0	1	2	3	4	1	1	2	0	0	1
1	2	3	1	1	3	3	2	1	1	2	2	0	1	1	1	1	2	1	1	1	0	0	0	0	0	0	1	2	3	4	1	1	2	0	0	1
1	2	3	1	3	3	2	3	3	1	2	1	0	1	1	1	1	1	3	4	0	0	0	0	0	0	0	1	1	4	1	1	1	2	0	0	0
1	2	3	1	2	3	2	3	1	1	2	1	0	1	1	1	1	2	1	1	1	0	0	0	0	0	0	1	1	4	1	1	1	2	0	0	2
1	2	3	1	3	3	2	2	1	1	2	3	0	1	1	2	1	2	3	1	1	0	0	1	0	0	0	1	2	1	4	1	1	2	0	0	2
1	2	3	1	3	2	2	2	1	1	2	2	0	1	1	3	1	3	3	1	0	0	0	0	1	0	0	1	1	3	4	1	1	2	0	1	2
1	2	3	1	3	3	3	2	1	1	2	1	0	1	1	2	1	2	3	1	0	0	0	0	0	0	0	1	1	3	4	1	1	2	0	0	0
1	2	3	1	2	3	2	2	1	1	2	1	0	1	1	2	1	2	1	2	1	0	0	0	0	0	0	1	1	2	1	1	1	1	1	0	2
1	2	3	1	3	3	2	2	1	1	2	2	0	1	1	2	1	2	1	1	0	0	0	0	0	0	0	1	1	3	4	1	1	2	0	0	2
1	2	3	1	3	3	2	2	1	1	2	1	0	1	1	1	1	2	1	1	0	0	0	0	0	0	0	1	2	3	4	1	1	2	0	0	0
1	2	3	1	2	3	1	2	1	1	2	1	0	1	1	1	1	2	4	1	1	1	0	0	0	0	0	1	1	1	4	1	1	2	0	0	3
1	2	3	1	2	3	2	2	1	1	2	1	0	1	1	1	1	2	1	1	1	0	0	0	0	0	0	1	1	3	4	1	1	2	0	0	1
1	2	3	1	3	3	2	2	3	1	3	1	0	1	1	1	1	2	1	2	0	0	0	0	1	0	0	3	1	1	1	3	1	2	0	0	3
1	2	3	1	2	3	1	2	1	1	2	1	0	1	1	2	1	2	4	4	1	0	0	0	0	1	1	1	1	1	4	1	1	2	0	0	4
1	2	3	1	2	2	3	2	1	1	3	1	0	1	1	1	1	1	1	1	1	0	0	0	0	0	0	3	2	3	4	4	4	2	0	1	1
1	2	3	1	3	2	2	3	1	1	3	1	0	1	1	2	1	3	1	1	1	0	0	1	0	0	0	3	1	3	2	2	1	2	0	1	3
1	2	3	1	2	3	2	1	3	1	2	1	0	1	1	1	1	2	3	4	1	0	0	0	0	0	0	1	2	3	4	2	1	2	0	0	1
1	2	3	1	2	2	2	3	1	2	3	2	0	1	1	2	1	2	3	4	1	0	0	0	0	0	0	3	1	1	1	1	1	2	0	0	1
1	2	3	1	3	2	3	1	2	1	1	3	0	1	1	1	1	1	1	1	1	0	1	0	0	0	0	2	1	3	1	2	1	1	1	1	4
1	2	3	1	3	2	3	1	2	1	1	1	0	1	1	1	1	3	3	4	0	0	0	1	0	0	0	2	2	4	1	1	4	2	0	1	1
1	2	3	1	1	3	3	2	3	1	2	2	0	1	1	2	1	4	2	4	1	0	1	0	1	0	0	1	1	1	4	1	1	2	0	0	4
1	2	3	1	2	3	3	2	1	1	2	1	0	1	1	1	1	2	1	1	0	1	0	0	0	0	0	1	2	3	4	1	1	2	0	0	1
1	2	3	1	2	3	3	2	1	1	2	2	0	1	1	2	1	2	3	1	0	0	0	0	0	0	0	1	2	3	4	1	1	2	0	0	0
1	2	3	1	3	3	2	2	1	1	2	1	0	1	1	2	1	2	1	1	1	0	0	0	0	0	0	1	1	3	4	1	1	2	0	0	1
1	2	3	1	1	2	2	#NULL!	1	2	3	2	0	1	1	1	1	2	3	2	0	0	0	0	0	0	0	3	2	3	1	1	1	2	0	0	0
1	2	3	1	2	2	2	3	1	1	3	1	0	1	1	1	1	2	4	4	0	0	0	0	0	0	0	3	1	3	4	3	1	2	1	0	0
1	2	3	1	4	2	3	5	3	1	1	2	0	1	1	2	1	2	1	1	1	0	0	0	0	0	0	2	1	3	4	1	4	2	1	0	1
1	2	3	1	1	2	#NULL!	2	1	1	2	1	0	1	1	2	1	2	1	1	1	0	0	0	0	0	0	1	2	1	4	1	1	2	0	0	1
1	2	3	1	2	3	3	3	1	1	2	1	0	1	1	1	1	2	3	1	0	0	0	0	0	0	0	1	1	4	4	1	1	2	0	0	0
1	2	3	1	2	2	2	2	1	1	2	1	0	1	1	2	1	3	3	3	0	0	0	0	0	0	0	1	1	3	4	1	1	2	0	0	0
1	2	3	1	1	3	2	3	1	1	3	2	0	1	1	2	1	2	3	1	0	0	1	0	0	0	0	3	1	3	3	1	1	2	1	0	1
1	2	3	1	3	3	1	2	1	1	2	1	0	2	1	3	1	2	1	4	0	0	0	0	0	0	0	1	1	3	4	1	1	2	0	0	0
1	2	3	1	3	2	3	2	1	1	2	1	0	1	1	2	1	2	1	1	0	0	0	0	0	0	0	1	2	3	4	1	1	2	0	0	0
1	2	3	1	2	2	3	2	1	1	2	1	0	1	1	2	1	2	1	1	1	1	0	0	0	0	0	1	2	3	4	1	1	2	0	0	2
1	2	3	1	3	2	2	2	1	1	2	2	0	1	1	2	1	2	3	4	1	0	0	0	0	0	0	1	1	3	4	1	1	2	0	0	1
1	2	3	1	2	2	2	2	1	1	2	1	0	1	1	1	1	2	1	1	1	0	1	0	0	0	0	1	1	1	4	1	1	2	0	0	2
1	2	3	1	3	1	2	1	3	1	1	2	0	1	1	1	1	2	1	1	1	0	1	0	0	0	0	2	2	2	4	#NULL!	1	2	0	0	2
1	2	3	1	3	2	3	2	1	1	2	2	0	1	1	2	1	3	1	4	0	0	0	0	0	0	0	1	1	1	4	1	1	2	0	0	1
1	2	3	1	2	2	3	2	1	1	2	2	0	1	1	2	1	2	3	1	0	0	0	0	0	0	0	1	2	3	4	1	1	2	0	0	0
1	2	3	1	2	2	3	2	1	1	2	2	0	1	1	1	1	3	1	1	1	0	0	0	0	0	0	1	1	1	1	1	1	1	0	0	1
1	2	3	1	4	2	2	1	3	1	2	1	0	1	1	1	1	3	3	1	1	0	0	1	0	0	0	1	1	3	4	1	1	2	1	0	4
1	2	3	1	3	2	2	1	3	1	2	2	0	1	1	1	1	2	1	2	0	0	1	0	0	0	0	1	1	3	4	1	1	2	0	0	1
1	2	3	1	3	2	1	1	2	1	2	1	0	1	1	1	1	2	2	2	1	0	1	0	0	0	0	1	1	3	4	1	1	2	0	0	3
1	2	3	1	3	2	1	1	3	1	1	1	0	1	1	2	1	2	1	1	0	0	0	0	0	0	0	2	1	2	4	1	1	2	0	0	1
1	2	3	1	3	#NULL!	3	1	2	1	1	1	0	1	1	1	1	2	1	1	0	0	0	0	0	0	0	2	1	2	3	1	2	2	0	0	0
1	2	3	1	4	2	3	1	3	1	1	2	0	1	1	1	1	2	2	1	0	0	0	0	0	0	0	2	1	4	2	1	1	2	0	0	0
1	2	3	1	2	2	2	1	2	1	2	1	0	1	1	1	1	2	1	1	1	0	0	0	0	0	0	1	1	1	4	3	1	2	0	0	1
1	2	3	1	3	2	2	1	3	1	1	1	0	1	1	1	1	2	1	1	0	0	0	0	0	0	0	2	1	3	3	1	1	2	0	0	0
1	2	3	1	4	2	3	1	3	1	1	1	0	1	1	1	1	2	1	4	0	0	0	0	0	0	0	2	1	2	1	2	1	2	0	0	1
1	2	3	1	3	2	3	1	3	1	1	1	0	1	1	1	1	3	1	1	0	0	0	0	0	0	0	2	1	3	3	1	1	1	0	0	1
1	2	3	1	3	2	3	1	3	1	1	1	0	1	1	2	1	2	2	2	1	1	0	0	0	0	0	1	1	3	4	2	4	2	0	0	2
1	2	3	1	3	2	2	1	2	1	1	2	0	2	3	2	1	1	1	1	0	0	0	0	0	0	0	2	1	1	2	1	1	1	0	0	0
1	2	3	1	3	2	1	1	3	1	1	2	0	1	1	2	1	2	1	1	0	0	0	0	0	0	0	2	1	3	3	4	1	1	0	0	0
1	2	3	1	4	1	2	5	3	1	1	1	0	1	1	2	1	2	1	1	0	0	0	0	0	0	0	2	2	4	4	#NULL!	1	2	0	0	0
1	2	3	1	3	3	2	2	1	1	2	2	0	1	1	2	1	2	1	1	0	0	0	0	0	0	0	1	1	1	1	1	1	1	0	0	0
1	2	3	1	2	2	3	2	1	4	3	1	0	1	1	1	1	2	3	4	1	0	0	0	0	0	0	3	1	3	1	1	1	2	1	0	1
1	2	3	1	2	2	3	3	1	2	3	1	0	1	1	2	1	2	3	1	0	0	0	0	0	0	0	3	1	3	1	1	1	2	0	0	0
1	2	3	1	4	2	3	5	3	1	1	1	0	1	1	1	1	2	1	1	0	0	0	0	0	0	0	2	1	3	2	1	1	2	0	0	0
1	2	3	1	3	2	2	5	3	#NULL!	1	1	0	1	1	1	1	2	3	4	0	0	0	0	0	0	0	2	1	1	4	2	1	2	0	0	0
1	2	3	1	3	2	2	3	1	2	3	1	0	1	1	2	1	3	3	4	1	0	0	0	0	0	0	3	2	3	4	4	1	2	0	0	1
1	2	3	1	2	2	2	3	1	1	3	1	0	1	1	2	1	2	4	4	0	0	0	0	0	0	0	3	1	3	4	1	1	2	0	0	0
1	2	3	1	3	2	3	1	3	1	3	1	0	1	1	1	1	2	4	4	0	0	0	0	0	0	0	3	2	3	2	2	1	2	0	0	0
1	2	3	1	3	2	3	1	3	1	3	2	0	1	1	1	1	2	1	1	0	0	0	0	0	0	0	3	1	3	1	2	1	2	0	0	0
1	2	3	1	3	2	2	2	1	1	2	3	0	1	1	1	1	2	3	4	1	0	0	0	0	0	0	1	1	3	4	1	1	2	0	0	1
1	2	3	1	3	2	2	1	3	1	2	1	0	1	1	1	1	2	1	2	0	0	1	0	0	0	0	1	1	2	2	1	1	1	0	0	1
1	2	3	1	3	2	2	1	3	1	3	1	0	1	1	1	1	2	1	1	1	0	0	0	0	0	0	3	1	2	2	3	1	2	0	0	1
1	2	3	1	3	2	2	1	3	1	1	2	0	1	1	1	1	3	1	1	1	0	0	0	0	0	0	2	1	1	4	3	1	2	0	0	1
1	2	3	1	2	2	1	2	1	1	2	1	0	1	1	2	1	2	1	1	0	0	0	0	0	0	0	1	2	3	4	1	1	2	0	0	0
1	2	3	1	3	2	3	1	3	1	1	1	0	1	1	2	1	2	3	1	0	0	0	0	0	0	0	1	1	3	4	2	1	2	0	0	1
1	2	3	1	1	2	3	2	1	1	2	1	0	1	1	2	1	2	3	4	1	0	0	0	0	0	0	1	1	1	1	1	1	2	0	0	2
1	2	3	1	2	2	2	2	1	1	2	1	0	1	1	2	1	2	1	3	1	0	0	0	0	0	0	1	2	1	1	1	1	1	0	0	1
1	2	3	1	3	2	2	1	3	1	1	2	0	2	1	2	1	2	1	1	0	0	1	0	0	0	0	2	1	2	4	1	1	2	0	0	1
1	2	3	1	1	2	2	3	1	1	3	1	0	1	1	2	1	2	1	1	1	0	0	0	0	0	0	3	1	3	4	3	1	2	1	0	1
1	2	3	1	2	2	3	2	1	2	2	1	0	1	1	2	1	2	2	2	1	0	0	0	0	0	0	1	1	1	3	2	1	2	0	0	1
1	2	3	1	3	2	2	2	1	1	2	1	0	1	1	2	1	2	1	1	1	0	0	0	0	0	0	1	2	1	1	2	1	2	0	0	1
1	2	3	1	4	2	2	2	3	1	1	2	0	1	1	1	1	2	1	1	0	0	0	0	0	1	0	1	1	2	2	2	1	1	0	0	1
1	2	3	1	3	2	2	1	3	1	2	1	0	1	1	1	1	2	2	2	1	0	0	0	0	0	0	1	1	1	1	1	1	2	0	0	1
1	2	3	1	3	2	2	1	3	1	2	2	0	1	1	2	1	2	1	3	0	0	0	0	0	0	0	1	1	3	1	1	1	2	0	0	0
1	2	3	1	1	2	3	2	1	1	3	1	0	1	1	1	1	2	4	4	0	0	0	0	0	0	0	3	1	3	1	1	1	2	0	0	0
1	2	3	1	3	2	3	1	2	1	1	2	0	1	1	2	1	2	3	1	0	0	0	0	0	0	0	1	2	3	4	2	1	2	0	0	0
1	2	3	1	2	2	3	2	2	1	1	1	0	1	1	1	1	2	1	4	0	0	0	0	0	0	0	1	2	3	3	3	1	1	0	0	0
1	2	3	1	3	2	1	2	1	1	2	2	0	1	1	1	1	2	3	2	1	0	1	0	0	1	0	1	2	1	4	1	1	2	0	0	4
2	2	2	1	3	3	1	2	2	1	1	2	0	1	1	2	1	2	1	1	1	0	1	0	1	0	1	1	2	2	2	1	1	1	0	1	4
2	2	2	1	3	2	1	1	3	1	1	2	0	2	2	2	1	3	1	1	1	0	0	0	0	0	0	2	1	2	3	1	1	2	1	0	1
2	2	2	1	4	2	2	1	2	1	1	2	0	2	2	2	1	2	1	1	0	1	0	0	0	0	0	2	2	2	3	#NULL!	2	2	1	0	4
2	2	2	1	2	1	2	2	2	1	1	1	0	2	2	2	1	3	1	1	1	1	0	0	0	0	0	2	1	4	4	#NULL!	2	2	0	0	3
1	2	2	1	3	2	1	5	1	2	1	3	0	1	1	3	1	3	2	1	1	0	1	0	0	0	0	2	2	4	4	3	1	2	0	1	3
1	2	2	1	3	2	2	1	3	1	1	1	0	1	1	1	1	3	4	4	0	1	0	0	1	0	0	2	1	4	4	1	1	2	0	1	2
1	2	2	1	3	2	3	2	3	1	1	1	0	1	1	1	1	2	1	4	1	0	0	0	0	0	0	1	1	3	4	3	1	2	0	0	1
2	2	1	1	3	3	2	2	1	2	3	1	0	2	2	1	1	2	1	1	1	0	1	1	1	1	0	3	1	1	4	4	1	2	0	1	4
2	2	1	1	2	3	1	1	2	1	1	2	0	1	1	2	1	2	1	1	1	0	0	0	0	0	0	2	2	3	3	1	1	1	1	0	1
2	2	1	1	1	2	3	2	1	1	2	2	0	2	2	1	1	3	1	1	0	0	0	0	1	0	0	1	2	3	4	1	1	2	1	1	1
2	2	1	1	2	2	1	3	1	1	2	1	0	3	1	2	1	2	1	1	0	1	0	0	0	0	0	1	1	1	1	1	1	1	0	0	1
2	2	1	1	1	3	3	2	1	1	2	1	0	1	1	1	1	2	1	1	0	0	0	0	0	0	1	1	1	1	4	1	1	2	0	0	2
2	2	1	1	3	2	1	3	1	1	2	1	0	3	1	1	1	1	1	1	1	1	0	1	0	0	0	1	1	4	3	1	1	#NULL!	0	0	3
2	2	1	1	1	3	2	2	1	1	2	1	0	1	1	1	1	2	1	1	1	0	0	0	0	0	0	1	2	1	4	1	1	2	0	0	1
2	2	1	1	3	2	2	2	3	1	1	2	0	1	1	1	1	2	1	1	1	0	1	0	0	0	0	2	1	2	1	2	1	2	0	0	3
2	2	1	1	1	2	3	3	1	1	2	1	0	1	1	1	1	2	1	1	1	0	0	0	0	0	0	1	1	2	4	1	1	2	0	0	2
2	2	1	1	1	2	2	2	1	1	2	2	0	1	1	1	1	2	1	1	0	1	0	0	0	0	0	1	2	3	4	1	1	2	0	0	1
2	2	1	1	3	3	2	1	2	1	1	2	0	#NULL!	#NULL!	#NULL!	1	2	1	1	1	0	1	1	0	0	0	1	2	4	4	3	1	2	0	0	3
2	2	1	1	1	2	3	2	1	1	2	1	0	2	1	1	1	3	1	1	1	0	0	0	0	0	0	1	1	2	4	1	1	2	1	0	2
2	2	1	1	2	2	2	1	2	1	1	2	0	1	1	2	1	2	1	1	1	0	0	0	0	0	0	2	1	3	4	1	4	2	0	0	1
2	2	1	1	2	2	2	#NULL!	1	1	3	3	0	1	1	1	1	2	1	1	1	0	1	0	0	0	0	3	1	3	3	4	4	2	0	0	2
2	2	1	1	2	2	3	2	1	1	2	1	0	1	1	1	1	2	1	1	1	0	0	0	0	0	0	1	1	1	4	1	1	2	0	0	1
2	2	1	1	2	2	2	2	1	4	3	2	0	1	1	1	1	3	1	1	0	0	0	0	0	0	1	3	1	3	1	1	1	2	0	0	2
2	2	1	1	3	1	3	2	2	1	3	2	0	1	1	1	1	2	1	1	0	0	0	0	0	0	0	3	2	3	4	#NULL!	1	2	1	0	0
1	2	1	1	3	3	1	1	2	1	1	1	0	2	1	1	1	2	2	1	0	0	0	0	0	0	0	1	2	1	4	2	1	2	0	0	0
1	2	1	1	3	3	3	1	3	1	1	1	0	1	1	1	1	2	1	2	0	1	0	0	0	0	0	2	1	4	4	1	1	2	0	0	1
1	2	1	1	3	3	3	2	1	1	2	1	0	1	1	1	1	2	3	3	1	1	0	0	0	0	0	1	1	2	3	1	1	2	0	0	2
1	2	1	1	1	1	3	3	1	1	2	2	0	3	1	1	1	2	3	4	1	0	0	0	0	0	0	1	2	4	4	#NULL!	1	2	0	0	1
1	2	1	1	3	3	2	2	1	1	2	2	0	1	1	2	1	2	1	1	1	0	0	0	0	0	0	1	1	3	4	1	1	2	0	0	1
1	2	1	1	2	1	2	4	1	#NULL!	1	1	0	1	1	1	1	2	1	1	0	0	0	0	0	0	1	2	1	1	4	#NULL!	1	2	0	0	1
2	2	#NULL!	1	4	2	#NULL!	1	3	1	1	1	0	1	1	1	1	2	1	1	0	0	0	0	0	0	0	2	1	2	4	1	1	1	0	0	0
2	1	3	1	2	2	1	2	1	2	2	1	0	1	1	2	1	2	1	1	1	0	1	1	0	0	0	1	1	3	1	1	1	1	0	1	4
2	1	3	1	2	2	2	3	1	2	3	2	0	1	1	2	1	2	1	1	1	0	1	0	0	0	0	3	2	3	4	1	1	2	1	1	2
2	1	3	1	1	3	2	2	2	1	2	3	0	1	1	2	1	1	1	1	1	1	0	0	0	0	0	1	2	3	4	1	1	2	0	1	3
2	1	3	1	3	2	3	3	1	1	3	2	0	1	1	2	1	1	1	1	1	1	0	0	0	0	0	3	2	4	4	4	4	1	0	1	3
2	1	3	1	2	2	2	2	1	1	2	2	0	1	1	2	1	2	1	1	1	0	0	0	1	0	0	1	1	2	1	1	1	1	0	1	2
2	1	3	1	1	2	3	2	1	1	2	2	0	1	1	1	1	3	1	1	1	0	1	0	0	0	0	1	2	3	4	1	1	2	1	1	4
2	1	3	1	2	2	2	2	1	1	2	3	0	1	1	3	1	1	1	1	0	0	0	0	0	0	0	1	2	2	4	1	1	2	0	1	0
2	1	3	1	2	2	2	2	1	1	2	2	0	2	3	3	2	3	1	1	0	0	0	0	0	0	0	1	2	3	4	1	1	2	0	1	0
2	1	3	1	3	2	#NULL!	1	3	1	1	1	0	1	1	1	1	2	3	3	0	0	0	0	0	0	0	2	1	2	3	1	1	2	0	0	0
2	1	3	1	1	2	3	2	1	1	2	1	0	1	1	1	1	2	1	1	1	0	0	0	0	0	0	1	1	1	4	1	1	1	0	1	1
2	1	3	1	3	2	3	2	1	1	2	2	0	1	1	1	1	2	1	1	0	1	0	0	1	0	0	1	2	3	4	1	1	2	0	1	2
2	1	3	1	3	2	2	1	1	1	1	2	0	2	1	2	1	3	1	1	0	0	0	0	0	0	0	2	2	3	4	4	1	2	0	1	2
2	1	3	1	1	3	3	2	1	1	2	2	0	1	1	1	1	2	1	1	1	1	0	0	0	0	0	1	2	3	4	1	1	2	0	0	2
2	1	3	1	1	3	2	3	1	1	2	1	0	1	1	1	1	1	1	1	0	0	0	0	0	0	0	1	1	4	1	1	1	2	0	0	0
2	1	3	1	3	3	2	3	1	1	2	1	0	1	1	1	1	2	1	1	1	0	0	0	0	0	0	1	1	4	2	1	1	2	0	0	1
2	1	3	1	3	3	1	3	1	1	2	1	0	1	1	1	1	2	1	1	0	0	0	0	0	0	0	1	1	2	4	1	1	2	0	0	0
2	1	3	1	2	2	1	3	1	3	3	1	0	1	1	3	1	3	1	1	0	0	0	0	0	0	0	3	1	3	4	2	1	2	0	0	0
2	1	3	1	3	3	3	2	1	1	2	1	0	1	1	1	1	2	1	1	0	0	0	0	0	0	0	1	2	3	4	1	1	2	0	0	0
2	1	3	1	2	3	2	2	1	1	2	1	0	1	1	2	1	2	1	1	0	0	0	0	0	0	0	1	2	2	4	1	1	2	0	0	0
2	1	3	1	3	2	2	2	1	1	2	2	0	1	1	1	1	2	1	1	1	1	1	0	0	0	0	1	1	1	3	1	1	2	0	1	3
2	1	3	1	2	2	1	2	1	2	2	1	0	1	1	2	1	2	1	1	0	0	0	0	0	0	1	1	1	3	4	1	1	2	0	0	1
2	1	3	1	3	3	1	1	2	1	1	2	0	1	1	1	1	2	1	1	0	1	0	0	0	0	0	2	1	4	1	1	1	1	0	0	1
2	1	3	1	2	2	3	2	1	1	2	2	0	2	2	1	1	3	1	1	0	0	0	0	1	0	0	1	2	2	4	1	1	2	1	1	2
2	1	3	1	2	2	2	2	1	1	2	1	0	1	1	1	1	2	1	1	1	0	1	0	0	0	0	1	1	1	4	1	1	2	0	0	4
2	1	3	1	1	2	2	#NULL!	1	4	3	2	0	1	1	2	1	2	1	1	0	0	0	0	0	0	0	3	1	3	4	1	1	2	0	0	0
2	1	3	1	2	2	2	4	1	2	3	1	0	1	1	1	1	2	1	1	0	0	0	0	0	0	0	3	2	1	4	1	1	1	0	0	0
2	1	3	1	2	3	3	2	1	2	2	2	0	1	1	2	1	2	1	1	0	0	0	0	0	0	0	1	1	2	1	1	1	2	0	0	0
2	1	3	1	1	3	2	1	2	1	1	2	0	1	1	1	1	2	4	1	0	0	0	0	1	0	0	2	1	2	4	1	2	2	1	0	3
2	1	3	1	3	2	3	1	3	1	1	2	0	1	1	2	1	2	1	1	1	0	1	0	0	0	0	2	1	1	1	1	1	1	0	1	2
2	1	3	1	2	3	3	3	1	1	3	2	0	1	1	1	1	2	1	1	0	0	0	0	0	0	0	3	1	3	4	1	1	2	0	0	0
2	1	3	1	1	3	2	2	1	3	1	1	0	1	1	2	1	2	1	1	1	0	0	0	0	0	0	2	2	4	3	1	1	2	0	0	1
2	1	3	1	2	2	3	2	2	1	1	2	0	1	1	1	1	2	1	1	0	0	0	0	0	0	1	1	1	3	1	3	2	2	0	0	2
2	1	3	1	1	2	3	4	1	3	1	3	0	1	1	3	1	3	1	1	0	0	0	0	0	0	0	2	2	4	4	2	1	2	0	0	1
2	1	3	1	1	2	2	2	1	2	2	2	0	1	1	2	1	2	1	1	1	0	0	0	0	0	0	1	1	3	4	1	1	2	0	0	1
2	1	3	1	4	2	2	5	2	1	2	1	0	1	1	1	1	1	1	1	0	0	0	0	0	0	0	1	1	2	4	1	1	2	1	0	0
2	1	3	1	3	2	2	5	1	1	1	2	0	1	1	2	1	2	1	1	1	0	0	0	0	0	0	2	1	2	4	1	1	2	0	0	1
2	1	3	1	2	2	2	3	2	1	2	1	0	1	1	1	1	2	1	1	0	0	0	0	0	0	0	1	1	2	1	1	1	1	0	0	0
2	1	3	1	2	3	2	2	1	1	2	2	0	1	1	1	1	2	2	1	0	0	0	0	0	0	0	1	2	1	4	1	1	2	0	0	0
2	1	3	1	1	3	2	2	1	1	2	2	0	1	1	2	1	3	1	1	0	0	1	0	0	0	0	1	2	1	4	1	1	2	1	0	2
2	1	3	1	2	3	1	2	1	1	2	2	0	1	2	2	1	2	1	4	1	1	1	0	0	1	1	1	1	1	4	2	1	2	0	0	4
2	1	3	1	2	2	3	3	1	2	3	1	0	1	1	1	1	2	1	1	0	0	0	0	0	0	0	3	2	3	4	1	1	2	0	0	0
2	1	3	1	3	2	3	3	1	2	3	1	0	3	#NULL!	2	1	4	1	1	1	1	0	0	0	0	0	3	1	4	4	3	1	2	0	0	2
2	1	3	1	2	2	3	2	1	2	2	1	0	1	1	1	1	1	1	1	1	0	0	0	0	0	0	1	1	2	4	2	1	2	0	0	1
2	1	3	1	2	2	3	2	1	2	2	1	0	1	1	1	1	2	1	1	1	0	0	0	0	0	0	1	1	3	1	1	1	1	0	0	1
2	1	3	1	2	2	2	3	1	1	2	3	0	3	3	1	1	1	1	1	1	0	1	0	0	0	0	1	2	1	4	1	1	2	0	0	2
2	1	3	1	3	2	2	3	1	1	2	2	0	1	1	1	1	2	1	1	0	0	0	0	0	0	0	1	2	1	4	1	1	2	0	0	0
2	1	3	1	2	2	2	3	1	1	2	3	0	1	1	1	1	2	1	1	1	0	0	0	0	0	0	1	2	1	4	1	1	2	0	0	1
2	1	3	1	3	2	2	3	2	1	2	1	0	1	1	1	1	2	1	1	0	1	0	0	0	0	0	1	1	1	4	1	1	2	0	0	1
2	1	3	1	1	2	2	3	2	1	2	1	0	1	1	1	1	2	1	1	1	0	0	0	0	0	0	1	1	1	1	1	1	1	0	0	1
2	1	3	1	2	2	2	3	2	1	2	1	0	1	1	1	1	2	1	1	0	0	0	0	0	0	0	1	1	1	1	1	1	1	0	0	0
2	1	3	1	2	2	2	3	2	1	2	1	0	1	1	1	1	2	1	1	0	0	0	0	0	0	0	1	1	2	4	1	1	1	0	0	1
2	1	3	1	3	2	2	3	1	1	2	2	0	1	1	2	1	2	2	1	1	0	0	0	0	0	0	1	1	2	1	1	3	1	0	0	2
2	1	3	1	3	2	2	3	1	1	2	1	0	1	1	1	1	2	1	1	1	0	0	0	0	0	0	1	1	1	2	1	1	2	0	0	1
2	1	3	1	3	2	2	3	1	1	2	1	0	1	1	1	1	2	1	1	0	0	0	0	0	0	1	1	1	1	2	1	1	1	1	0	1
2	1	3	1	1	2	2	3	1	1	2	3	0	1	1	1	1	2	1	1	1	0	0	0	0	0	0	1	1	2	4	3	1	2	0	0	2
2	1	3	1	1	3	3	3	1	4	3	3	0	2	1	3	1	3	1	1	0	0	1	0	0	0	1	3	1	3	1	3	1	2	1	0	3
2	1	3	1	3	2	3	5	2	1	1	1	0	1	1	2	1	1	1	1	1	0	0	0	0	0	0	2	1	3	3	2	1	2	0	0	1
2	1	3	1	2	2	2	2	1	1	2	1	0	1	1	2	1	2	1	1	0	0	0	0	0	0	0	1	1	1	3	1	1	1	0	0	1
2	1	3	1	2	2	2	2	1	1	2	2	0	1	1	2	1	3	1	1	0	0	0	0	0	0	0	1	2	1	3	1	1	2	1	0	1
2	1	3	1	2	2	2	2	1	1	2	1	0	1	1	2	1	2	1	1	0	0	0	0	0	0	0	1	1	1	4	1	1	2	0	0	0
2	1	3	1	3	2	3	5	3	1	1	2	0	1	1	1	1	2	1	1	0	1	0	0	0	0	0	2	1	3	4	1	2	2	0	0	1
2	1	3	1	3	2	2	2	1	1	2	1	0	1	1	1	1	2	1	1	0	0	0	0	0	0	0	1	1	1	3	1	1	2	0	0	0
2	1	3	1	2	2	2	2	1	1	2	1	0	1	1	2	1	2	1	1	1	0	0	0	0	0	0	1	1	1	4	1	1	2	0	0	1
2	1	3	1	1	2	2	2	1	1	2	3	0	1	1	1	1	2	1	1	1	0	0	0	0	1	0	1	1	2	3	1	1	1	1	0	3
2	1	3	1	3	3	3	4	1	2	2	1	0	1	1	1	1	2	1	1	0	0	0	0	0	0	0	1	1	1	4	4	1	2	0	0	0
2	1	3	1	2	2	3	3	1	1	3	2	0	1	1	1	1	2	1	1	1	1	0	0	0	0	0	3	1	2	4	1	1	2	0	0	2
2	1	3	1	2	2	3	3	1	1	3	2	0	1	1	2	1	2	1	1	0	1	0	0	0	0	0	3	1	1	3	2	1	1	0	0	1
2	1	3	1	3	2	3	3	2	1	1	1	0	1	1	1	1	3	1	1	0	0	0	0	0	0	0	2	2	2	1	3	1	1	0	0	1
2	1	3	1	2	2	2	2	1	1	2	1	0	1	1	1	1	3	1	1	1	0	0	0	0	0	0	1	1	2	4	1	1	2	1	0	2
2	1	3	1	3	2	2	2	1	1	2	1	0	1	1	2	1	3	1	1	1	0	0	0	0	0	0	1	1	4	4	1	1	2	0	0	1
2	1	3	1	1	2	2	2	1	1	2	1	0	1	1	2	1	2	1	1	0	0	0	0	0	0	0	1	1	3	3	2	1	1	0	0	0
2	1	3	1	2	2	1	2	1	1	2	2	0	1	1	2	1	3	1	1	1	0	0	0	0	0	0	1	1	3	4	1	1	2	0	0	2
2	1	3	1	1	3	2	2	1	1	2	1	0	1	1	1	1	3	1	1	0	0	0	0	0	0	0	1	1	3	4	1	1	2	0	0	0
2	1	3	1	3	2	3	2	1	1	2	1	0	1	1	2	1	2	1	1	0	0	1	0	0	0	0	1	2	3	4	1	1	2	0	0	1
2	1	3	1	2	2	2	2	1	1	2	1	0	1	1	1	1	2	1	1	1	0	0	0	0	0	0	1	2	3	4	1	1	2	0	0	1
2	1	3	1	1	2	2	2	1	1	2	2	0	1	1	2	1	2	1	1	1	0	0	0	0	0	0	1	2	3	4	1	1	2	0	0	1
2	1	3	1	2	2	2	2	1	1	2	2	0	1	1	2	1	2	1	1	0	0	0	0	0	0	0	1	2	3	4	1	1	2	0	0	0
2	1	3	1	2	2	2	2	1	1	2	1	0	1	1	2	1	2	1	1	0	0	0	0	0	0	0	1	2	3	4	1	1	2	0	0	0
2	1	3	1	2	2	2	2	1	1	2	1	0	1	1	2	1	2	1	1	0	0	0	0	0	0	0	1	1	3	1	1	1	2	0	0	0
2	1	3	1	2	2	2	2	1	1	2	1	0	1	1	1	1	2	1	1	0	0	0	0	0	0	0	1	1	1	4	1	1	2	0	0	0
2	1	3	1	2	2	1	2	2	1	1	3	0	1	1	1	1	3	1	1	1	1	1	0	0	1	0	2	2	3	4	2	1	1	1	0	4
2	1	3	1	2	2	3	2	1	1	2	3	0	1	1	2	1	2	1	1	0	0	1	0	0	0	0	1	2	3	4	1	1	2	1	0	2
2	1	3	1	1	2	3	2	1	1	2	2	0	1	1	2	1	1	1	1	0	0	1	0	0	0	0	1	2	3	4	2	1	2	0	0	2
2	1	3	1	1	2	3	2	1	1	2	2	0	1	1	1	1	2	1	1	1	0	1	0	0	0	0	1	2	1	4	1	1	2	0	0	4
2	1	3	1	3	2	3	2	1	1	2	2	0	1	1	2	1	2	1	1	0	0	0	0	0	0	0	1	2	3	4	1	1	2	0	0	0
2	1	3	1	2	2	3	2	1	1	2	2	0	1	1	1	1	2	1	1	1	0	0	0	0	0	0	1	1	2	1	1	1	1	0	0	1
2	1	3	1	2	2	3	2	1	1	2	2	0	2	2	2	1	3	1	1	1	0	0	0	0	0	0	1	1	1	4	1	1	2	1	0	1
2	1	3	1	1	2	2	2	1	1	2	1	0	1	1	2	1	2	1	1	0	0	0	0	0	0	0	1	1	3	4	1	1	2	0	0	0
2	1	3	1	2	2	2	2	1	1	3	1	0	1	1	1	1	2	1	1	0	0	0	0	0	0	0	3	1	2	3	3	1	2	0	0	0
2	1	3	1	3	2	2	2	3	1	1	2	0	1	1	1	1	2	1	1	0	0	0	0	0	0	1	2	1	3	2	2	1	1	0	0	1
2	1	3	1	1	2	1	1	2	1	2	2	0	1	1	1	1	3	1	1	1	1	0	0	0	1	0	1	1	3	4	1	1	2	0	0	3
2	1	3	1	4	2	3	2	3	1	1	1	0	1	1	1	1	3	1	1	0	0	0	0	0	0	0	2	1	2	3	5	4	2	0	0	1
2	1	3	1	3	2	3	2	2	1	1	2	0	1	1	3	1	3	1	1	0	0	0	0	0	0	1	2	2	3	4	1	1	2	0	0	1
2	1	3	1	3	2	3	2	2	1	1	2	0	1	1	2	1	2	1	1	0	0	0	0	0	0	0	2	1	3	4	2	1	2	0	0	0
2	1	3	1	2	2	2	1	2	1	2	2	0	1	1	2	1	2	1	1	1	0	1	0	0	0	0	1	2	3	4	1	1	2	0	0	2
2	1	3	1	3	2	2	1	2	1	2	1	0	1	1	1	1	2	1	2	0	0	0	0	1	0	0	1	1	2	4	1	1	2	0	0	1
2	1	3	1	4	2	2	1	3	1	2	1	0	1	1	1	1	2	1	1	1	0	0	0	0	0	0	1	1	1	2	1	1	2	0	0	1
2	1	3	1	2	2	2	1	3	1	2	1	0	1	1	1	1	2	1	1	0	0	0	0	0	0	0	1	2	3	3	1	1	2	0	0	0
2	1	3	1	3	2	2	1	3	1	2	1	0	1	1	1	1	2	1	1	1	0	0	0	0	0	0	1	1	1	1	1	1	1	0	0	1
2	1	3	1	3	2	1	1	2	1	2	1	0	1	1	1	1	2	1	1	1	0	1	0	0	0	0	1	2	1	1	1	1	1	0	0	2
2	1	3	1	3	1	2	1	2	1	1	2	0	1	1	1	1	2	1	1	1	0	1	0	0	0	0	2	2	2	4	#NULL!	1	2	0	0	3
2	1	3	1	3	2	3	1	2	1	1	1	0	1	1	1	1	2	1	1	0	0	0	0	0	0	0	2	1	1	1	1	1	1	0	0	0
2	1	3	1	4	2	3	1	2	1	1	2	0	1	1	2	1	2	1	1	1	0	0	0	0	0	1	2	1	3	1	#NULL!	4	2	1	0	2
2	1	3	1	3	2	3	1	3	1	1	2	0	1	1	1	1	2	1	1	1	0	0	0	0	0	0	2	1	3	4	1	1	2	0	0	1
2	1	3	1	4	2	2	1	3	1	2	1	0	1	1	1	1	2	1	1	1	1	1	0	0	0	0	1	1	3	1	2	1	1	0	0	3
2	1	3	1	2	2	2	1	2	1	2	2	0	1	1	2	1	2	1	1	1	0	0	0	1	0	0	1	2	3	4	1	3	2	1	0	3
2	1	3	1	3	2	2	1	2	1	1	3	0	2	2	1	1	3	1	1	0	0	0	0	0	0	0	2	1	3	4	2	1	2	0	0	2
2	1	3	1	3	2	1	1	2	1	1	1	0	1	1	1	1	3	1	1	1	0	0	0	0	0	0	2	1	4	2	2	4	2	0	0	1
2	1	3	1	3	2	1	1	2	1	1	2	0	1	1	2	1	2	1	1	0	0	0	0	0	0	0	2	1	3	3	1	1	1	0	0	0
2	1	3	1	2	3	3	2	2	1	1	2	0	1	1	1	1	2	1	1	1	0	1	0	0	0	0	2	2	3	1	1	1	2	1	0	2
2	1	3	1	3	2	3	1	2	1	1	1	0	1	1	1	1	2	1	1	0	0	0	0	0	0	0	2	2	2	4	2	1	2	0	0	0
2	1	3	1	3	2	2	1	2	1	1	2	0	1	1	1	1	2	1	1	0	0	0	0	0	0	0	2	1	2	4	1	4	2	0	0	2
2	1	3	1	3	2	2	1	3	1	1	2	0	2	1	2	1	2	1	1	1	0	0	0	0	0	0	2	2	3	4	1	1	2	0	0	1
2	1	3	1	3	2	1	1	2	1	1	3	0	1	1	1	1	2	1	1	0	0	0	0	0	0	0	2	1	2	4	2	1	2	0	0	1
2	1	3	1	3	2	1	1	2	1	1	1	0	1	1	1	1	2	1	1	0	0	0	0	0	0	0	2	1	3	3	1	1	2	0	0	0
2	1	3	1	3	2	1	1	2	1	1	1	0	1	1	1	1	2	1	1	0	0	0	0	0	0	0	2	2	2	4	1	1	2	0	0	0
2	1	3	1	1	2	3	3	1	1	2	1	0	1	1	1	1	2	1	1	1	0	0	0	0	0	0	1	1	2	4	1	1	2	0	0	1
2	1	3	1	3	2	3	1	3	1	1	1	0	1	1	1	1	3	1	1	0	0	1	0	0	0	0	2	1	2	4	1	1	2	0	0	1
2	1	3	1	1	2	3	3	1	4	3	2	0	1	1	2	1	3	1	1	1	0	0	0	0	0	0	3	2	3	1	1	1	2	1	0	2
2	1	3	1	1	2	3	3	1	4	3	1	0	1	1	1	1	2	1	1	0	0	0	0	0	0	0	3	1	3	1	1	1	2	0	0	0
2	1	3	1	1	2	3	#NULL!	1	4	3	2	0	1	1	1	1	2	1	1	1	1	0	0	0	0	0	3	2	3	4	2	1	2	0	0	2
2	1	3	1	3	2	3	3	1	2	3	2	0	1	1	2	1	3	1	1	0	0	1	0	0	0	0	3	1	3	4	1	1	2	0	0	1
2	1	3	1	2	2	3	2	1	1	2	1	0	1	1	2	1	2	1	1	0	0	1	0	0	0	0	1	2	1	4	1	1	2	0	0	1
2	1	3	1	1	2	2	2	1	3	2	2	0	1	1	2	1	2	1	1	1	0	0	0	0	0	0	1	1	2	4	1	1	2	0	0	1
2	1	3	1	1	2	2	2	1	2	2	2	0	1	1	2	1	2	1	1	0	1	1	0	0	0	0	1	1	2	4	1	1	2	0	0	2
2	1	3	1	3	2	2	2	1	2	2	1	0	1	1	1	1	2	1	1	1	1	1	0	0	0	0	1	1	3	2	1	1	2	0	0	3
2	1	3	1	2	2	2	3	1	1	2	1	0	1	1	1	1	2	1	1	0	0	0	0	0	0	0	1	1	4	1	1	1	2	0	0	1
2	1	3	1	2	2	2	2	1	1	2	1	0	1	1	1	1	2	1	1	1	0	0	0	0	0	0	1	1	3	1	1	1	2	0	0	1
2	1	3	1	2	2	2	2	2	4	3	2	0	1	1	2	1	2	1	1	0	0	0	0	0	0	0	3	1	3	1	1	1	2	1	0	0
2	1	3	1	1	2	2	#NULL!	1	4	3	1	0	1	1	1	1	2	1	1	1	0	0	0	0	0	0	3	2	3	1	1	1	2	0	0	1
2	1	3	1	1	2	2	3	1	2	1	2	0	1	1	2	1	2	1	1	0	1	1	0	0	0	0	1	2	4	4	1	1	2	0	0	2
2	1	3	1	3	2	2	2	1	2	2	2	0	1	1	1	1	2	1	1	0	0	0	0	0	0	0	1	1	3	4	2	1	2	0	0	1
2	1	3	1	2	2	2	3	1	1	2	1	0	2	1	2	1	2	1	1	0	1	0	0	0	0	0	1	1	1	1	2	1	2	0	0	2
2	1	3	1	1	2	2	3	1	1	2	3	0	1	1	1	1	3	1	1	1	1	1	0	0	0	0	1	1	2	4	1	1	2	0	0	4
2	1	3	1	2	2	2	3	1	1	3	3	0	1	1	2	1	3	1	1	0	0	0	0	0	0	0	3	1	3	4	3	1	2	1	0	1
2	1	3	1	2	2	1	3	1	4	3	3	0	1	1	2	1	3	1	1	0	0	0	0	0	0	0	3	2	3	4	1	1	2	1	0	0
2	1	3	1	3	2	1	1	2	2	1	1	0	1	2	1	1	2	1	1	0	0	0	0	0	0	0	2	1	1	2	1	1	2	0	0	0
2	1	3	1	2	2	3	2	1	1	2	2	0	2	2	2	1	2	1	1	0	0	0	0	0	0	0	1	1	1	4	1	1	2	0	0	0
2	1	3	1	2	2	3	2	2	1	3	1	0	2	1	1	1	2	1	1	1	0	0	0	0	0	0	3	1	3	1	3	1	1	0	0	1
2	1	3	1	1	2	3	2	1	1	3	2	0	1	1	2	1	2	1	1	0	0	0	0	1	0	0	3	2	1	4	1	1	2	0	0	1
2	1	3	1	3	2	3	2	3	1	1	2	0	1	1	2	1	2	1	1	1	1	0	0	0	0	0	1	1	2	2	2	1	1	0	0	3
2	1	3	1	3	2	3	1	1	1	2	1	0	1	1	1	1	2	1	1	0	0	0	0	0	0	0	1	1	1	3	1	1	1	0	0	0
2	1	3	1	2	2	3	1	3	1	1	1	0	1	1	1	1	2	1	1	1	0	1	0	0	0	0	2	1	3	4	1	1	2	0	0	2
2	1	3	1	3	2	3	1	3	1	1	1	0	1	1	1	1	3	1	1	0	0	1	0	0	0	0	2	1	3	4	1	2	2	0	0	1
2	1	3	1	3	2	3	1	2	1	1	1	0	1	1	1	1	4	1	2	1	0	0	0	0	0	0	1	1	3	1	1	1	1	0	0	1
2	1	3	1	2	2	3	2	1	4	3	1	0	1	1	2	1	2	1	1	0	0	0	0	0	0	0	3	1	3	1	1	1	2	1	0	1
2	1	3	1	1	2	2	2	1	1	2	1	0	1	1	1	1	2	1	1	0	0	0	0	0	0	0	1	1	1	1	1	1	2	0	0	0
2	1	3	1	3	2	2	2	1	1	2	2	0	1	2	3	1	3	1	1	0	1	0	0	0	0	0	1	1	2	1	1	1	1	0	0	1
2	1	3	1	2	2	2	2	1	1	2	1	0	1	1	1	1	2	1	1	0	0	0	0	0	0	0	1	1	1	3	1	1	1	0	0	0
2	1	3	1	4	2	2	2	3	1	1	1	0	1	1	1	1	2	1	1	0	1	0	0	0	0	0	1	1	2	1	1	1	1	0	0	1
2	1	3	1	3	2	2	1	2	1	2	1	0	1	1	1	1	2	1	1	1	0	0	0	0	0	0	1	1	1	1	1	1	2	0	0	1
2	1	3	1	4	2	1	5	3	1	1	1	0	1	1	1	1	1	1	2	0	1	0	0	0	0	0	1	1	1	2	2	1	1	0	0	1
2	1	3	1	2	2	1	3	1	1	3	1	0	1	1	1	1	2	2	1	0	0	0	0	0	0	0	3	1	3	4	2	4	2	0	0	0
2	1	3	1	2	2	1	2	1	1	2	1	0	1	1	2	1	2	1	1	1	0	0	0	0	0	0	1	1	2	4	1	1	2	0	0	1
2	1	3	1	2	2	1	2	1	1	2	1	0	1	1	1	1	2	1	1	1	0	0	0	0	0	0	1	1	2	4	3	1	2	0	0	1
2	1	3	1	3	2	3	2	1	4	3	1	0	1	1	1	1	2	1	1	0	0	0	0	0	0	0	3	1	3	1	1	1	1	1	0	0
2	1	3	1	2	2	3	2	1	1	2	2	0	2	2	1	1	2	1	1	1	0	0	0	0	0	0	1	2	1	2	1	1	2	0	0	1
2	1	3	1	2	2	3	2	1	1	3	1	0	1	1	1	1	2	1	1	1	0	0	0	0	0	0	3	1	3	4	4	1	1	0	0	2
2	1	3	1	4	2	3	2	3	1	1	1	0	1	1	1	1	2	1	1	1	0	1	0	0	1	0	1	2	1	2	2	2	1	0	0	3
2	1	3	1	3	2	3	1	3	1	1	1	0	1	1	1	1	3	1	1	0	0	0	0	0	0	0	2	1	2	3	3	1	1	0	0	0
2	1	3	1	3	2	3	5	1	1	3	1	0	3	2	3	1	2	1	1	0	0	0	0	0	0	0	3	1	4	4	2	1	2	0	0	1
2	1	3	1	3	2	2	#NULL!	2	1	3	2	0	1	1	1	1	3	1	1	1	0	0	0	0	0	0	3	2	3	4	3	1	2	0	0	1
2	1	3	1	3	2	2	1	3	#NULL!	1	1	0	1	1	1	1	2	1	1	1	0	0	0	0	0	0	1	1	1	1	2	1	1	0	0	2
2	1	3	1	3	2	2	5	2	1	1	2	0	1	1	3	1	2	1	1	0	0	0	0	0	0	0	2	1	4	2	2	1	2	0	0	0
2	1	3	1	2	2	2	2	1	1	2	1	0	1	1	1	1	2	1	1	0	0	0	0	0	0	0	1	1	1	2	1	1	1	0	0	0
2	1	3	1	3	2	2	2	3	1	1	1	0	1	1	1	1	2	1	1	1	0	0	0	0	0	0	1	2	1	3	2	1	1	0	0	1
2	1	3	1	3	2	2	1	2	1	3	1	0	1	1	1	1	2	1	1	0	0	0	0	0	0	0	3	1	2	3	3	1	1	0	0	0
2	1	3	1	3	2	2	1	2	1	1	2	0	1	1	1	1	2	1	1	0	0	0	0	0	0	0	1	1	1	4	1	1	2	0	0	0
2	1	3	1	1	2	2	3	1	4	3	2	0	3	1	2	1	2	4	4	0	0	0	0	0	0	0	3	1	3	1	2	1	2	0	0	1
2	1	3	1	2	2	2	3	1	1	3	1	0	1	1	1	1	2	1	1	0	0	0	0	0	0	0	3	1	1	4	1	1	1	0	0	0
2	1	3	1	1	2	2	2	1	1	2	2	0	1	1	2	1	2	1	1	1	0	1	0	0	0	0	1	1	3	4	1	1	2	0	0	2
2	1	3	1	2	2	2	2	1	1	2	2	0	1	1	2	1	3	1	1	0	0	0	0	0	0	0	1	1	2	1	1	1	1	0	0	0
2	1	3	1	3	2	2	#NULL!	2	1	1	2	0	1	1	3	1	2	1	1	0	0	0	0	0	0	0	2	2	4	3	1	1	2	0	0	0
2	1	3	1	1	2	2	2	1	4	3	1	0	1	1	1	1	3	1	1	0	0	0	0	0	0	0	3	2	3	4	1	1	2	0	0	0
2	1	3	1	3	2	2	3	2	1	1	1	0	1	1	1	1	2	1	1	1	0	0	0	0	0	0	1	1	2	3	1	2	2	0	0	1
2	1	3	1	3	2	1	2	3	1	1	2	0	1	1	1	1	3	1	1	1	0	0	0	0	0	0	1	1	4	4	3	1	2	0	0	1
2	1	3	1	3	2	1	1	2	1	1	2	0	1	1	2	1	3	1	1	1	1	0	0	0	0	0	2	2	3	4	4	1	2	1	0	3
2	1	3	1	1	2	3	2	1	1	2	1	0	1	1	1	1	2	1	1	0	0	0	0	0	0	0	1	1	3	4	1	1	2	0	0	0
2	1	3	1	3	2	3	1	2	1	1	2	0	1	1	2	1	2	1	1	1	0	0	0	0	0	0	1	2	3	4	2	1	2	0	0	1
2	1	3	1	1	2	3	2	1	4	3	1	0	1	1	1	1	2	1	1	0	0	0	0	0	0	0	3	2	3	1	1	1	2	1	0	0
2	1	3	1	3	2	3	2	1	4	3	3	0	1	1	2	1	2	1	1	1	0	0	0	0	0	0	3	1	3	1	1	1	1	1	0	2
2	1	3	1	2	2	3	2	1	1	2	1	0	2	1	1	1	2	2	2	1	1	0	0	0	0	0	1	1	1	4	1	1	2	0	0	2
2	1	3	1	2	2	3	2	1	1	2	3	0	1	1	2	1	3	1	1	1	1	1	0	0	0	1	1	2	3	4	3	1	2	0	0	4
2	1	3	1	2	2	3	2	1	1	2	1	0	1	1	2	1	2	1	1	0	0	0	0	0	0	0	1	2	3	4	1	1	2	0	0	0
2	1	3	1	2	2	3	2	1	1	2	1	0	1	1	1	1	2	1	1	1	0	0	0	0	0	0	1	1	2	3	1	1	1	0	0	1
2	1	3	1	1	2	3	2	1	1	2	1	0	1	1	2	1	2	1	1	1	0	0	0	0	0	0	1	2	1	4	3	1	2	0	0	2
2	1	3	1	3	2	3	2	1	1	2	1	0	1	1	1	1	2	1	1	0	0	0	0	0	0	0	1	1	3	4	1	1	2	0	0	0
2	1	3	1	1	2	2	2	1	1	2	1	0	1	1	2	1	3	1	1	0	0	0	0	0	0	0	1	2	3	3	3	2	2	0	0	1
2	1	3	1	1	2	2	2	1	1	2	1	0	1	1	1	1	2	1	1	1	1	0	0	0	0	1	1	1	1	4	1	1	2	0	0	3
2	1	3	1	1	2	2	2	1	1	2	1	0	1	1	2	1	2	1	1	0	0	1	0	0	0	0	1	1	3	4	1	1	2	0	0	1
2	1	3	1	4	2	2	1	3	1	1	1	0	1	1	1	1	2	1	1	1	0	0	0	0	0	0	1	2	1	4	1	1	2	0	0	1
2	1	3	1	3	2	2	1	2	1	1	2	0	1	1	1	1	2	1	1	1	0	0	0	0	0	0	2	1	1	3	1	2	2	0	0	1
2	1	3	1	2	2	2	1	2	1	1	1	0	2	1	2	1	2	1	1	0	0	0	0	0	0	0	2	1	3	2	1	1	2	0	0	1
2	1	3	1	3	2	2	1	2	1	1	2	0	1	1	2	1	2	1	1	1	0	1	0	0	0	0	1	2	3	4	3	1	2	0	0	2
2	1	3	1	3	2	2	3	1	2	3	1	0	1	1	2	1	1	1	1	0	0	0	0	0	0	0	3	1	3	4	3	1	2	0	0	0
2	1	3	1	2	2	2	2	1	2	2	2	0	1	1	3	1	2	1	1	1	0	0	0	0	0	0	1	1	1	4	1	1	2	0	0	3
2	1	3	1	2	2	1	2	1	1	2	2	0	1	1	2	1	2	1	1	0	0	0	0	0	0	0	1	2	1	4	1	1	2	0	0	1
2	1	3	1	3	2	1	1	3	1	1	1	0	1	1	1	1	2	1	1	1	0	0	0	0	0	0	1	1	1	3	2	1	1	0	0	1
2	1	3	1	2	2	1	2	1	1	2	1	0	1	1	1	1	2	1	1	1	0	0	0	0	0	0	1	1	1	3	1	1	1	0	0	1
2	1	3	1	3	2	3	1	2	1	1	1	0	1	1	1	1	3	1	1	0	1	0	0	0	0	0	2	2	1	1	1	1	1	1	0	1
2	1	3	1	3	2	3	1	2	1	1	1	0	1	1	1	1	2	1	1	0	0	1	0	0	0	0	2	2	2	4	2	1	2	1	0	2
2	1	3	1	2	2	3	5	2	1	1	2	0	1	1	2	1	2	1	1	1	0	0	0	0	0	0	2	1	4	4	1	1	2	0	0	1
2	1	3	1	1	2	3	2	1	1	2	1	0	1	1	1	1	2	1	1	0	1	0	0	0	0	0	1	1	4	4	2	1	2	0	0	1
2	1	3	1	2	2	3	1	3	1	2	1	0	1	1	1	1	2	1	1	0	0	0	0	0	0	0	1	2	3	4	1	1	2	0	0	0
2	1	3	1	3	2	3	1	2	1	1	2	0	1	1	1	1	3	1	1	0	0	0	0	0	0	0	2	1	3	2	1	1	1	0	0	0
2	1	3	1	3	2	3	1	2	1	1	2	0	1	1	2	1	2	1	1	1	0	0	0	0	0	0	1	2	3	4	2	1	2	0	0	1
2	1	3	1	3	2	3	1	3	#NULL!	1	1	0	1	1	1	1	2	1	1	1	0	0	0	0	0	0	1	1	1	1	2	1	1	0	0	1
2	1	3	1	4	2	3	1	3	1	1	2	0	1	1	2	1	2	1	1	1	0	0	0	0	0	0	1	1	4	4	1	1	1	0	0	1
2	1	3	1	2	2	2	2	1	2	2	3	0	2	1	3	1	2	1	1	0	0	0	0	0	0	0	1	2	1	4	1	1	2	0	0	1
2	1	3	1	2	2	2	2	1	2	2	2	0	1	1	2	1	2	1	1	1	0	0	0	0	0	0	1	2	1	1	1	1	2	0	0	1
2	1	3	1	2	2	2	5	1	1	2	2	0	1	1	2	1	2	1	1	1	0	0	0	0	0	0	1	1	2	2	1	1	2	0	0	1
2	1	3	1	2	2	2	2	1	1	3	1	0	1	1	2	1	3	1	1	0	0	0	0	0	0	0	3	2	3	4	4	4	1	0	0	0
2	1	3	1	4	2	2	2	#NULL!	1	1	2	0	1	1	1	1	3	1	1	1	0	0	0	0	1	0	2	1	2	1	1	1	1	0	0	2
2	1	3	1	3	2	2	2	3	1	1	2	0	1	1	2	1	2	3	1	1	0	0	0	0	0	0	1	1	1	1	1	1	1	1	0	1
2	1	3	1	2	2	2	1	2	1	2	3	0	2	2	3	1	3	1	1	1	1	1	0	0	0	0	1	1	1	4	1	1	2	1	0	4
2	1	3	1	4	2	2	1	3	1	2	1	0	1	1	1	1	2	1	1	0	0	0	0	0	0	0	1	1	3	4	1	1	2	1	0	0
2	1	3	1	2	2	2	1	2	1	1	1	0	1	1	1	1	2	1	1	0	0	0	0	0	0	0	2	1	3	4	1	1	2	0	0	0
2	1	3	1	2	2	2	1	2	1	1	1	0	1	1	1	1	2	1	1	1	0	0	0	0	0	0	2	1	3	4	1	1	2	0	0	1
2	1	3	1	3	2	2	2	3	1	1	2	0	1	1	2	1	2	1	1	1	0	0	0	0	0	0	1	1	3	3	3	1	2	0	0	1
2	1	3	1	4	2	2	1	3	1	1	2	0	1	1	2	1	2	1	1	0	0	0	0	0	0	0	1	2	3	4	1	1	2	0	0	0
2	1	3	1	1	2	1	2	1	1	2	2	0	3	1	2	1	2	1	1	1	0	1	0	0	0	0	1	1	4	4	1	1	2	1	0	2
2	1	3	1	3	2	1	2	3	1	1	1	0	1	1	1	1	1	1	1	0	0	0	0	0	0	0	1	2	4	4	1	4	2	0	0	0
2	1	3	1	4	1	3	1	2	#NULL!	1	3	0	1	1	2	1	2	1	1	0	0	0	0	0	0	1	2	1	3	3	#NULL!	4	2	0	0	3
1	1	3	1	3	2	2	1	1	2	1	1	0	1	1	1	1	3	3	3	0	0	0	0	0	0	0	2	1	3	3	1	1	2	0	1	0
1	1	3	1	3	2	3	5	2	1	1	3	0	1	1	3	1	1	1	1	0	1	0	1	0	0	0	2	1	3	4	1	1	2	0	1	2
1	1	3	1	2	2	3	2	1	1	2	3	0	1	1	2	1	3	3	1	1	0	0	0	0	0	0	1	2	3	4	1	1	2	1	1	1
1	1	3	1	3	2	2	2	3	1	3	2	0	1	1	2	1	3	1	1	1	0	0	0	0	0	0	3	1	3	3	2	1	2	0	1	2
1	1	3	1	2	2	3	2	2	1	2	3	0	1	1	1	1	3	3	1	1	0	0	0	0	0	0	1	1	2	4	3	1	2	0	1	2
1	1	3	1	3	2	2	1	2	1	2	1	0	1	1	2	1	2	3	4	1	0	0	1	0	0	0	1	1	3	4	1	1	2	0	1	2
1	1	3	1	3	2	2	1	3	1	1	2	0	1	2	2	1	3	2	2	0	0	0	0	0	0	0	2	1	2	4	1	2	2	0	1	0
1	1	3	1	2	2	1	3	1	2	3	1	0	3	1	1	1	1	1	1	1	0	0	1	0	0	0	3	1	3	4	3	1	2	0	1	2
1	1	3	1	2	2	2	1	2	1	2	2	0	1	1	1	1	4	1	1	0	0	1	0	0	0	0	1	1	1	4	1	1	2	1	1	1
1	1	3	1	2	2	2	3	1	2	3	2	0	1	1	2	1	3	1	4	1	0	0	1	0	1	0	3	1	3	4	2	1	2	0	1	3
1	1	3	1	4	2	3	2	#NULL!	1	1	2	0	1	1	2	1	2	1	1	1	0	0	0	0	0	1	2	1	2	4	1	1	2	0	1	2
1	1	3	2	2	2	3	1	2	1	2	2	0	1	1	1	1	3	4	4	0	0	0	0	0	0	0	1	1	3	4	1	1	2	0	1	1
1	1	3	1	2	2	3	1	2	1	2	1	0	1	1	1	1	2	3	1	0	0	0	0	0	0	0	1	1	1	4	1	1	2	0	1	0
1	1	3	1	3	2	2	3	1	3	3	3	0	1	1	3	1	3	2	2	0	0	0	0	0	0	0	3	1	2	2	2	1	2	0	1	1
1	1	3	1	3	1	1	3	1	2	3	1	0	1	1	1	1	2	1	4	0	0	0	0	0	0	0	3	1	3	4	#NULL!	1	1	0	0	0
1	1	3	1	3	2	3	2	2	1	2	1	0	1	1	1	1	2	1	2	0	0	0	0	0	0	0	1	1	2	2	1	1	1	0	1	1
1	1	3	1	2	3	2	2	1	1	2	1	0	1	1	2	1	2	3	1	1	0	0	0	0	0	0	1	2	3	4	1	1	2	0	0	2
1	1	3	1	3	2	3	1	3	1	3	1	0	1	1	1	1	1	3	1	0	1	0	0	0	0	0	3	1	1	1	1	1	2	0	1	1
1	1	3	1	1	2	2	1	2	1	2	2	0	1	1	2	1	2	4	4	0	0	0	0	0	0	0	1	1	3	4	1	1	2	0	1	1
1	1	3	1	4	2	2	1	2	1	1	3	0	1	1	1	1	2	1	1	0	0	0	0	0	0	0	2	2	3	4	2	1	2	0	1	1
1	1	3	1	3	3	3	1	2	1	1	1	0	1	1	1	1	2	1	1	0	0	0	0	0	0	0	2	1	3	4	1	1	2	0	0	0
1	1	3	1	3	3	2	1	3	1	2	1	0	1	1	1	1	2	1	4	1	0	0	0	0	0	0	1	1	4	2	1	1	2	0	0	1
1	1	3	1	3	3	2	1	3	1	2	2	0	1	1	1	1	2	1	1	0	0	0	0	0	0	1	1	1	2	4	1	1	2	0	0	1
1	1	3	1	3	2	3	5	3	1	1	2	0	2	1	3	1	4	1	2	1	0	1	1	0	0	0	2	1	3	4	1	4	1	0	1	3
1	1	3	1	3	2	2	4	1	2	1	2	0	1	1	2	1	3	2	2	1	1	1	0	0	0	0	1	2	3	4	3	4	2	0	0	3
1	1	3	1	3	2	1	1	1	2	1	2	0	1	1	1	1	3	1	1	1	0	0	0	0	0	0	2	2	2	4	2	1	2	1	0	2
1	1	3	1	2	#NULL!	2	1	3	1	2	1	0	1	1	1	1	2	1	1	0	0	0	0	0	0	0	1	1	3	4	1	1	2	0	0	0
1	1	3	1	3	3	1	2	2	1	2	1	0	1	1	2	1	2	3	1	1	0	0	0	0	0	0	1	2	3	1	1	1	2	0	0	1
1	1	3	1	2	2	3	1	1	1	2	1	0	1	1	2	1	2	1	1	1	0	0	0	0	0	0	1	1	1	1	2	1	2	0	1	1
1	1	3	1	3	2	3	5	3	1	2	3	0	2	2	1	1	3	2	3	1	0	0	0	0	0	0	1	1	3	4	2	1	2	1	1	1
1	1	3	1	3	2	2	3	1	2	3	1	0	1	1	2	1	2	3	2	0	1	0	0	0	0	0	3	2	3	3	1	1	2	0	0	1
1	1	3	1	2	2	2	2	1	2	2	2	0	1	1	2	1	2	3	4	0	0	0	0	0	0	0	1	1	2	2	1	1	2	0	0	0
1	1	3	1	3	2	2	5	2	1	3	2	0	1	1	1	1	2	3	4	0	1	0	0	0	0	0	3	2	3	4	3	1	2	0	0	1
1	1	3	1	2	2	1	3	2	1	2	2	0	1	1	1	1	3	3	4	1	0	0	0	0	0	0	1	1	3	1	1	1	1	0	0	1
1	1	3	1	2	2	1	3	1	1	3	2	0	1	1	2	1	2	1	1	0	0	0	0	0	0	1	3	2	3	4	1	1	2	0	0	2
1	1	3	1	3	2	1	2	1	1	2	1	0	1	1	2	1	2	3	3	0	0	0	0	0	0	0	1	2	1	3	1	1	2	0	0	0
1	1	3	1	4	2	3	5	2	1	2	2	0	1	1	1	1	2	3	3	1	0	0	0	0	0	0	1	1	2	3	1	1	2	1	0	1
1	1	3	1	3	2	3	5	3	1	1	2	0	1	1	2	1	2	3	4	0	0	0	0	0	0	0	2	1	3	2	1	1	2	0	0	0
1	1	3	1	3	2	3	5	3	1	1	1	0	1	1	2	1	2	4	1	0	0	0	0	0	0	0	2	1	4	4	1	1	2	0	0	1
1	1	3	1	3	2	3	5	3	1	1	2	0	1	1	2	1	2	3	1	1	0	0	0	0	0	0	2	1	4	4	2	1	2	0	0	1
1	1	3	1	2	2	2	2	1	1	2	2	0	1	1	2	1	3	3	3	1	0	0	0	0	0	0	1	1	4	3	1	1	1	0	0	2
1	1	3	1	1	2	2	2	1	1	2	1	0	1	1	2	1	2	1	1	1	0	0	0	0	0	0	1	2	1	1	1	1	2	0	0	1
1	1	3	1	2	2	2	2	1	1	2	1	0	1	1	2	1	2	1	1	1	0	1	0	0	0	0	1	2	2	2	2	1	2	0	0	3
1	1	3	1	4	1	3	2	3	1	1	2	0	1	1	2	1	2	4	4	0	1	0	0	0	0	0	2	1	2	4	#NULL!	1	2	0	1	1
1	1	3	1	4	2	3	3	2	1	2	1	0	1	1	1	1	2	4	1	0	0	0	0	0	0	0	1	1	2	1	1	1	1	0	0	0
1	1	3	1	1	2	3	3	1	1	3	1	0	1	1	1	1	2	3	1	0	0	0	0	0	0	0	3	1	3	3	1	1	1	0	0	0
1	1	3	1	3	2	2	2	1	1	2	1	0	1	1	1	1	1	1	1	0	1	0	0	0	0	0	1	1	1	1	1	1	1	0	0	2
1	1	3	1	2	2	2	2	1	1	2	2	0	1	1	1	1	3	3	3	0	0	0	0	0	0	0	1	2	3	4	1	1	2	0	0	0
1	1	3	1	2	2	2	2	2	1	2	1	0	1	1	2	1	2	3	4	1	0	0	0	0	0	0	1	2	3	4	1	1	2	0	0	1
1	1	3	1	2	2	2	2	1	1	2	1	0	1	1	1	1	2	1	3	1	0	0	0	0	0	0	1	1	1	3	1	1	2	0	0	2
1	1	3	1	3	2	2	2	1	1	2	1	0	1	1	2	1	1	3	4	0	0	0	0	0	0	0	1	2	2	4	1	1	2	0	0	0
1	1	3	1	2	2	1	2	1	1	2	2	0	1	1	1	1	2	3	3	1	0	0	0	0	0	0	1	1	2	3	1	1	1	0	0	1
1	1	3	1	2	3	2	2	1	1	2	2	0	1	1	1	1	2	1	1	0	0	1	0	0	0	0	1	2	1	4	1	1	2	0	0	1
1	1	3	1	2	3	2	2	1	1	2	1	0	1	1	1	1	2	1	1	1	0	0	0	0	0	0	1	2	1	#NULL!	1	1	2	0	0	1
1	1	3	1	3	2	3	2	1	1	2	1	0	1	1	1	1	2	3	2	1	0	0	0	0	0	0	1	1	1	3	1	1	1	0	0	1
1	1	3	1	3	2	2	2	1	1	2	2	0	1	1	1	1	3	1	1	1	1	0	0	0	0	1	1	2	3	4	1	1	2	1	0	3
1	1	3	1	2	2	2	2	1	1	2	1	0	1	1	2	1	2	3	1	0	0	0	0	0	0	0	1	2	3	4	#NULL!	1	2	0	0	0
1	1	3	1	2	2	2	2	1	1	2	1	0	1	1	1	1	2	1	1	0	0	0	0	0	0	0	1	2	3	4	1	1	2	0	0	0
1	1	3	1	2	2	2	2	2	1	2	2	0	1	1	1	1	2	1	1	0	0	0	0	0	0	0	1	2	3	4	1	1	2	0	0	0
1	1	3	1	2	2	2	2	1	1	2	1	0	1	1	2	1	2	3	4	0	0	0	0	0	0	0	1	2	3	4	1	1	2	0	0	0
1	1	3	1	2	2	2	2	1	1	2	1	0	1	1	1	1	2	1	1	0	0	0	0	0	0	0	1	1	1	3	1	1	1	0	0	0
1	1	3	1	3	3	2	1	2	1	2	1	0	2	2	2	1	2	1	1	1	0	0	0	0	0	0	1	1	3	1	4	1	2	0	0	1
1	1	3	1	2	2	3	2	1	1	2	1	0	1	1	2	1	2	3	4	1	0	0	0	0	0	0	1	2	3	4	1	1	2	0	0	1
1	1	3	1	2	2	3	2	1	1	2	1	0	1	1	2	1	2	2	1	0	0	0	0	0	0	0	1	2	1	4	1	1	2	0	0	0
1	1	3	1	3	2	3	2	1	1	2	1	0	1	1	1	1	2	3	1	0	1	0	0	0	0	1	1	1	3	4	1	1	2	0	0	2
1	1	3	1	2	2	3	2	2	1	2	3	0	1	1	1	1	2	3	1	1	0	0	0	0	0	0	1	2	3	4	1	1	2	1	0	3
1	1	3	1	3	2	3	2	1	1	2	1	0	1	1	1	1	3	3	1	1	1	0	0	0	0	0	1	1	1	4	1	1	2	0	0	2
1	1	3	1	3	2	3	2	1	1	3	1	0	1	1	1	1	2	2	1	0	0	0	0	0	0	0	3	1	3	4	1	1	1	0	0	0
1	1	3	1	3	2	2	2	2	1	2	2	0	1	1	2	1	2	1	1	1	0	0	0	0	0	0	1	2	3	4	2	1	2	0	0	1
1	1	3	1	2	2	2	2	1	1	3	2	0	1	1	2	1	2	4	4	1	0	0	0	0	0	0	3	1	1	1	1	1	2	0	0	1
1	1	3	2	2	2	2	1	2	1	2	2	0	1	1	2	1	2	3	1	0	0	0	0	0	0	0	1	1	2	4	1	1	2	0	0	0
1	1	3	1	2	2	1	1	2	1	2	1	0	1	1	1	1	2	3	4	1	0	0	0	0	0	0	1	1	1	4	1	1	2	0	0	1
1	1	3	1	3	2	3	2	3	1	1	2	0	1	1	1	1	3	1	4	0	0	0	0	0	0	0	2	2	3	4	2	1	2	0	0	1
1	1	3	1	3	2	3	1	2	1	2	1	0	1	1	1	1	2	2	2	1	0	0	0	1	0	0	1	1	1	4	1	1	2	0	0	3
1	1	3	1	3	2	2	1	2	1	2	2	0	1	1	2	1	2	3	1	0	0	0	0	0	0	0	1	1	1	4	1	1	2	0	0	0
1	1	3	1	2	2	2	1	2	1	2	2	0	1	1	2	1	2	3	1	0	1	0	0	0	0	0	1	1	4	4	3	1	2	0	0	1
1	1	3	1	3	2	2	1	3	1	2	1	0	1	1	1	1	2	3	1	1	0	1	0	0	0	0	1	2	3	4	1	1	1	0	0	2
1	1	3	1	3	2	2	1	3	1	2	1	0	1	1	1	1	2	2	4	0	0	0	0	0	0	0	1	2	3	4	1	1	2	0	0	0
1	1	3	1	3	2	2	1	2	1	2	1	0	1	1	1	1	2	1	1	0	0	0	0	0	0	0	1	2	1	4	1	1	2	0	0	0
1	1	3	1	3	2	2	1	2	1	2	1	0	1	1	2	1	2	3	3	1	0	1	0	0	0	0	1	1	3	3	2	1	1	0	0	2
1	1	3	1	3	2	3	1	2	1	2	2	0	1	1	2	1	2	3	1	1	0	0	0	0	1	0	1	2	3	4	1	1	2	0	0	2
1	1	3	1	3	2	3	1	3	1	2	1	0	1	1	1	1	2	3	4	0	0	0	0	0	0	1	1	1	1	4	1	1	2	0	0	3
1	1	3	1	2	2	3	1	2	1	2	1	0	1	1	1	1	2	3	4	1	0	0	0	0	0	0	1	1	1	4	1	1	2	0	0	1
1	1	3	1	3	2	2	1	1	1	2	2	0	1	1	2	1	2	3	4	1	0	0	0	0	0	0	1	1	2	1	3	1	2	0	0	1
1	1	3	1	3	2	2	1	2	1	2	1	0	1	1	1	1	2	3	1	0	0	0	0	0	0	0	1	1	3	4	2	1	2	0	0	0
1	1	3	1	4	2	2	1	3	1	2	1	0	1	1	1	1	2	1	1	0	0	0	0	0	0	0	1	1	2	1	2	1	1	0	0	0
1	1	3	1	4	2	2	1	3	1	2	1	0	1	1	1	1	2	3	2	0	0	0	0	0	0	0	1	1	3	4	1	1	2	0	0	0
1	1	3	1	3	2	2	1	3	1	2	2	0	1	1	2	1	2	3	4	1	0	0	0	0	0	0	1	2	3	4	1	1	2	0	0	2
1	1	3	1	3	2	2	1	3	1	2	1	0	1	1	1	1	2	3	1	0	0	0	0	0	1	0	1	2	1	1	1	1	2	0	0	1
1	1	3	1	2	2	2	1	3	1	3	1	0	1	1	1	1	2	2	2	0	0	0	0	0	0	0	3	1	3	4	1	1	2	0	0	0
1	1	3	1	3	2	2	1	2	1	1	2	0	1	1	1	1	3	1	1	0	0	0	0	0	0	1	2	1	4	4	2	1	2	0	0	2
1	1	3	1	3	2	1	1	3	1	1	2	0	1	1	1	1	2	1	1	1	0	0	0	0	0	0	2	1	3	4	1	1	2	0	0	1
1	1	3	1	4	2	3	1	3	1	1	1	0	1	1	1	1	3	2	1	1	0	0	0	0	0	0	2	1	3	4	1	1	2	0	0	1
1	1	3	1	3	2	3	1	3	1	1	1	0	2	2	1	1	3	1	1	1	0	1	0	0	0	0	2	1	3	3	1	1	2	0	0	2
1	1	3	1	3	2	3	#NULL!	3	1	3	2	0	1	1	1	1	2	1	1	0	0	1	0	0	0	0	3	1	3	3	1	1	2	0	0	1
1	1	3	1	4	2	3	5	3	#NULL!	1	2	0	1	1	2	1	2	3	3	0	0	0	0	0	0	0	2	1	2	4	1	1	2	0	0	0
1	1	3	1	3	2	2	1	3	1	1	1	0	1	1	1	1	2	1	1	0	0	0	0	0	0	0	2	1	3	2	1	1	2	0	0	0
1	1	3	1	3	2	2	1	3	1	1	2	0	1	1	1	1	2	1	1	0	0	0	0	0	0	0	2	1	4	1	2	1	1	0	0	0
1	1	3	1	2	2	2	1	2	1	1	1	0	1	1	1	1	3	3	1	1	1	1	0	0	0	0	2	1	1	3	2	1	2	0	0	3
1	1	3	1	3	2	2	1	3	1	1	2	0	1	1	1	1	2	1	1	1	0	0	0	0	0	0	2	1	2	3	1	1	2	0	0	1
1	1	3	1	2	2	2	1	3	1	1	2	0	1	1	1	1	3	3	3	0	0	0	0	0	0	0	2	1	3	2	2	1	2	0	0	0
1	1	3	1	3	2	3	3	1	2	3	2	0	1	1	2	1	2	3	4	0	0	0	0	0	0	0	3	1	2	3	3	1	2	0	0	0
1	1	3	1	1	2	3	3	2	1	2	1	0	1	1	1	1	2	1	3	0	0	0	0	0	0	0	1	1	2	3	1	1	1	0	0	0
1	1	3	1	3	2	3	3	1	1	2	1	0	1	1	1	1	2	1	1	0	0	0	0	0	0	0	1	1	2	4	3	1	2	0	0	0
1	1	3	1	3	2	2	1	2	1	1	2	0	1	2	1	1	3	2	4	0	0	0	0	0	0	0	2	1	4	2	5	1	2	0	0	0
1	1	3	1	3	2	2	1	3	1	1	2	0	3	1	2	1	3	3	4	1	0	0	0	0	0	0	2	1	2	2	2	1	2	0	0	1
1	1	3	1	3	2	2	3	3	#NULL!	1	1	0	1	1	1	1	2	1	1	0	0	0	0	0	0	0	2	1	1	2	3	1	2	1	0	1
1	1	3	1	3	2	2	1	3	#NULL!	3	1	0	1	1	1	1	2	1	1	0	0	0	0	0	0	0	3	1	2	4	1	1	1	0	0	0
1	1	3	1	2	2	2	2	2	4	3	2	0	1	1	2	1	2	4	4	1	0	0	0	0	0	0	3	1	3	1	1	1	2	0	0	1
1	1	3	1	2	2	2	2	2	2	2	1	0	1	1	1	1	2	1	1	1	0	1	0	0	0	0	1	1	1	4	1	1	2	1	0	3
1	1	3	1	2	2	2	3	2	1	2	1	0	1	1	1	1	2	1	1	0	0	0	0	0	0	0	1	1	4	4	1	1	2	0	0	0
1	1	3	1	3	2	2	3	1	1	3	1	0	1	1	2	1	2	3	3	1	0	0	0	0	0	0	3	1	3	1	3	1	2	0	0	2
1	1	3	1	3	2	2	2	1	1	2	1	0	1	1	1	1	2	1	1	1	0	0	0	0	0	0	1	2	1	4	1	1	2	0	0	1
1	1	3	1	3	2	1	1	3	1	1	2	0	1	1	2	1	2	3	2	1	0	0	0	0	0	0	2	2	2	3	1	1	1	0	0	1
1	1	3	1	3	2	1	1	3	1	1	2	0	1	1	2	1	2	3	4	1	0	0	0	0	0	0	2	2	4	4	2	1	2	0	0	1
1	1	3	1	2	2	1	2	1	4	3	2	0	1	1	2	1	2	4	4	0	0	1	0	0	0	0	3	1	3	1	1	1	2	0	0	1
1	1	3	1	3	2	1	2	2	4	3	1	0	1	1	1	1	2	3	4	1	0	0	0	0	0	0	3	1	3	1	3	1	2	0	0	2
1	1	3	1	2	2	1	5	2	1	3	1	0	1	1	1	1	2	3	1	0	0	0	0	0	0	0	3	1	3	1	3	1	2	0	0	0
1	1	3	1	2	2	3	2	1	1	2	1	0	2	1	2	1	2	1	1	1	0	0	0	0	0	0	1	1	2	4	1	1	2	0	0	1
1	1	3	1	2	2	3	2	1	1	3	3	0	1	1	2	1	2	3	2	0	0	0	0	0	0	0	3	1	3	1	1	1	2	0	0	1
1	1	3	1	2	2	3	2	1	1	3	2	0	1	1	2	1	2	2	2	0	0	0	0	0	0	0	3	1	3	2	4	2	1	1	0	0
1	1	3	1	3	2	3	2	3	1	1	1	0	1	1	1	1	2	1	1	1	0	0	0	0	0	0	2	1	3	4	2	3	1	0	0	1
1	1	3	1	3	2	3	2	2	1	1	2	0	1	1	1	1	2	2	1	1	1	0	0	0	0	0	1	1	2	2	2	1	1	0	0	3
1	1	3	1	3	2	3	1	3	1	3	1	0	2	1	1	1	2	2	4	1	0	0	0	0	0	0	3	1	3	4	4	1	2	0	0	1
1	1	3	1	3	2	2	2	1	1	2	1	0	1	1	1	1	2	3	3	1	1	0	0	0	0	0	1	1	3	3	1	1	2	1	0	2
1	1	3	1	2	2	2	2	1	1	2	1	0	1	1	1	1	2	3	4	0	0	0	0	0	0	1	1	2	3	4	1	1	2	0	0	1
1	1	3	1	1	2	2	2	1	1	3	1	0	1	1	1	1	2	1	1	0	0	0	0	0	0	0	3	1	3	1	3	1	2	0	0	0
1	1	3	1	3	2	2	2	2	1	3	2	0	1	1	1	1	2	3	4	1	0	0	0	0	0	0	3	1	3	2	1	1	2	0	0	2
1	1	3	1	3	2	2	2	3	1	1	1	0	1	1	1	1	3	3	2	0	0	0	0	0	0	0	2	1	3	4	1	3	2	0	0	0
1	1	3	1	4	2	2	2	3	1	1	1	0	1	1	2	1	2	1	4	0	0	0	0	0	0	0	2	1	1	2	1	1	2	0	0	1
1	1	3	1	3	2	2	2	3	1	1	2	0	1	1	2	1	2	1	1	1	0	1	0	0	0	0	1	1	2	2	2	1	1	0	0	2
1	1	3	1	3	2	2	1	3	1	2	1	0	1	1	2	1	2	3	1	0	0	0	0	0	0	0	1	2	2	4	1	1	2	0	0	0
1	1	3	1	3	2	2	1	3	1	3	1	0	1	1	1	1	2	3	3	0	0	0	0	0	0	0	3	1	3	1	2	1	2	0	0	0
1	1	3	1	1	2	2	1	1	1	3	1	0	1	1	1	1	2	3	4	0	0	0	0	0	1	0	3	1	2	4	1	1	2	1	0	1
1	1	3	1	3	2	2	1	2	1	1	1	0	1	1	1	1	2	3	1	1	0	0	0	0	0	0	2	1	3	4	1	1	2	0	0	1
1	1	3	1	3	2	2	1	3	1	1	1	0	1	1	1	1	2	3	1	0	0	0	0	0	0	0	2	2	4	4	1	1	2	0	0	0
1	1	3	1	3	2	1	5	3	1	1	2	0	1	1	2	1	2	1	4	0	0	0	0	0	0	0	2	2	3	4	2	1	2	1	0	2
1	1	3	1	2	2	1	2	1	1	3	1	0	1	1	3	1	2	1	4	1	0	0	0	0	0	0	3	1	3	1	1	1	2	0	0	1
1	1	3	1	3	2	3	1	3	1	2	1	0	1	1	2	1	2	1	2	1	0	0	0	0	0	0	1	1	1	3	1	1	2	0	0	1
1	1	3	1	3	2	3	3	1	1	3	1	0	1	1	2	1	2	3	4	0	0	0	0	0	1	0	3	2	3	4	1	1	2	0	0	2
1	1	3	1	3	2	3	2	1	1	2	1	0	1	1	1	1	2	2	2	1	0	0	0	0	0	0	1	1	1	4	1	1	2	0	0	1
1	1	3	1	3	2	2	3	1	4	3	2	0	1	1	2	1	2	1	1	1	0	0	0	0	0	0	3	1	3	1	2	1	2	1	0	1
1	1	3	1	3	2	2	1	2	1	2	1	0	1	1	1	1	2	3	4	1	0	0	0	0	0	0	1	1	3	4	2	1	1	0	0	1
1	1	3	1	1	2	2	1	2	1	2	1	0	1	1	1	1	2	2	1	1	1	0	1	0	0	0	1	1	1	3	1	1	2	0	0	3
1	1	3	1	3	2	2	1	3	1	1	2	0	1	1	2	1	2	3	3	0	0	0	0	0	0	0	2	1	3	4	2	1	2	0	0	0
1	1	3	1	3	2	2	1	3	1	1	1	0	1	1	1	1	2	3	4	0	0	0	0	0	0	0	2	1	2	4	2	3	1	0	0	0
1	1	3	1	2	2	2	3	1	1	2	2	0	1	1	1	1	2	1	1	1	0	0	0	0	0	1	1	1	2	2	1	1	2	0	0	3
1	1	3	1	1	2	1	2	1	1	3	1	0	1	1	2	1	2	1	1	0	0	0	0	0	0	0	3	1	3	1	1	1	2	0	0	0
1	1	3	1	4	2	1	1	2	1	1	2	0	1	1	2	1	2	1	2	0	0	0	0	0	0	0	2	1	3	1	1	1	1	0	0	1
1	1	3	1	3	2	#NULL!	2	3	1	1	1	0	1	1	1	1	1	1	1	0	0	0	0	0	0	0	1	2	4	4	1	4	2	0	0	0
1	1	3	1	3	2	3	2	2	1	2	2	0	1	1	1	1	2	2	3	0	0	0	0	0	0	0	1	2	3	4	1	1	2	0	0	1
1	1	3	1	2	2	3	2	1	1	3	1	0	1	1	1	1	2	3	4	0	0	0	0	0	0	0	3	1	2	4	1	1	2	0	0	1
1	1	3	1	3	2	3	1	3	1	1	2	0	1	1	2	1	2	3	4	0	1	0	0	0	0	0	2	1	2	4	3	1	2	0	0	3
1	1	3	1	2	2	3	2	1	4	3	1	0	1	1	1	1	2	1	1	0	0	0	0	0	1	0	3	1	3	1	1	1	2	0	0	2
1	1	3	1	2	2	2	2	1	1	2	2	0	1	1	1	1	2	1	1	1	0	0	0	0	0	0	1	2	3	4	1	1	2	0	0	2
1	1	3	1	2	2	2	1	2	1	2	2	0	3	1	2	1	2	3	1	0	0	0	0	0	0	0	1	2	4	4	1	1	2	0	0	0
1	1	3	1	3	2	2	1	2	1	2	1	0	2	2	2	1	2	2	2	0	0	0	0	0	0	0	1	1	1	4	1	1	2	0	0	0
1	1	3	1	3	2	2	1	3	1	3	1	0	1	1	1	1	2	1	3	1	0	0	0	0	0	0	3	1	3	4	3	1	2	0	0	1
1	1	3	1	4	2	2	1	3	1	1	3	0	2	1	2	1	3	4	1	0	0	0	0	0	0	0	2	1	3	4	4	4	2	0	0	1
1	1	3	1	2	2	2	1	1	1	1	2	0	1	1	1	1	2	3	1	0	0	0	0	0	0	0	2	1	4	4	4	4	2	0	0	0
1	1	3	1	4	2	2	1	3	1	1	1	0	1	1	1	1	2	3	2	0	0	0	0	0	0	0	2	1	3	3	2	1	2	0	0	0
1	1	3	1	3	2	2	1	3	1	1	1	0	1	1	1	1	2	3	1	0	0	0	0	0	0	0	2	1	2	3	1	1	2	0	0	0
1	1	3	1	2	2	1	2	1	1	2	1	0	1	1	1	1	2	1	2	0	0	0	0	0	0	0	1	1	1	2	1	1	1	0	0	0
1	1	3	1	1	2	1	2	1	1	3	1	0	1	1	2	1	2	1	1	0	0	0	0	0	0	0	3	1	3	3	1	1	2	0	0	0
1	1	3	1	1	2	1	1	1	1	2	1	0	1	1	2	1	2	3	1	0	0	0	0	0	0	0	1	1	4	4	1	1	1	0	0	0
1	1	3	1	3	2	1	2	1	4	1	1	0	1	1	1	1	2	3	2	0	0	0	0	0	0	0	1	2	4	1	1	4	2	0	0	0
1	1	3	1	3	2	3	1	3	1	2	1	0	1	1	1	1	2	2	1	0	0	0	0	0	0	0	1	1	1	2	1	1	1	0	0	0
1	1	3	1	3	2	3	1	2	1	1	1	0	1	1	1	1	2	2	2	0	0	0	0	0	0	0	2	1	3	4	1	1	2	0	0	0
1	1	3	1	2	2	3	2	3	3	1	1	0	1	1	1	1	1	1	4	0	0	0	0	0	0	0	1	2	4	1	2	1	1	0	0	0
1	1	3	1	2	2	3	3	1	1	2	1	0	1	1	2	1	2	1	2	1	0	0	0	0	0	0	1	1	1	4	1	1	2	0	0	3
1	1	3	1	2	2	3	1	3	1	2	1	0	1	1	1	1	2	2	2	1	0	0	0	0	0	0	1	1	1	4	1	1	2	0	0	1
1	1	3	1	2	2	3	1	3	1	1	1	0	1	1	1	1	2	3	1	0	0	0	0	0	0	0	2	1	3	4	4	1	2	0	0	1
1	1	3	1	2	2	2	3	1	1	3	2	0	1	1	1	1	3	1	2	1	1	1	1	0	0	0	3	1	2	4	3	1	2	0	0	4
1	1	3	1	3	2	2	2	2	1	1	2	0	1	1	2	1	3	1	1	1	0	0	0	0	0	0	2	1	3	4	3	1	2	0	0	1
1	1	3	1	2	2	2	1	2	1	2	1	0	1	1	1	1	2	4	2	0	0	0	0	0	0	1	1	1	3	1	1	1	2	0	0	1
1	1	3	1	2	2	2	1	2	1	1	1	0	1	1	1	1	2	3	3	1	0	0	0	0	0	0	2	1	3	4	1	1	2	1	0	1
1	1	3	1	3	2	2	1	3	1	1	1	0	1	1	1	1	1	1	1	1	0	0	0	0	0	0	2	1	2	4	2	1	1	0	0	1
1	1	3	1	3	2	2	1	3	1	1	2	0	1	1	1	1	2	1	3	0	0	0	0	0	0	0	2	1	2	4	1	1	2	0	0	1
1	1	3	1	3	2	2	1	3	1	1	1	0	1	1	2	1	2	2	2	1	0	0	0	0	0	0	1	1	1	2	2	1	2	0	0	2
1	1	3	1	4	2	2	1	3	1	1	2	0	1	1	2	1	2	1	1	1	0	0	0	0	0	0	1	2	4	4	1	1	2	0	0	1
1	1	3	1	1	2	2	2	1	1	2	1	0	1	1	1	1	2	2	3	0	0	0	0	0	0	0	1	2	3	4	1	1	2	0	0	0
1	1	3	1	2	2	1	2	3	1	1	1	0	1	1	1	1	2	1	1	1	1	0	1	0	0	0	1	2	4	4	3	1	2	0	0	3
1	1	3	1	3	2	1	3	1	2	1	2	0	1	1	2	1	2	1	1	1	0	1	0	0	0	1	1	2	4	4	1	1	2	0	0	3
1	1	3	1	3	2	1	1	2	1	1	1	0	1	1	1	1	2	1	1	1	0	0	0	0	0	0	1	1	1	3	2	1	2	0	0	1
1	1	3	1	3	2	1	1	2	1	1	2	0	1	1	2	1	2	1	1	1	0	0	0	0	0	0	1	2	4	4	2	4	2	0	0	1
2	1	2	1	1	3	1	2	1	1	2	2	0	1	1	2	1	2	1	1	1	0	1	0	0	0	0	1	2	1	1	1	1	2	1	0	2
2	1	2	1	1	3	2	1	2	1	1	2	0	1	1	1	1	2	1	3	0	0	0	0	0	0	0	2	1	2	4	3	1	2	0	0	0
2	1	2	1	2	2	2	2	1	1	2	1	0	1	1	2	1	2	1	1	0	0	0	0	0	0	0	1	2	2	4	1	1	2	0	0	0
2	1	2	1	3	1	2	1	3	1	2	1	0	1	1	2	1	2	1	1	0	0	0	0	0	0	0	1	2	3	4	#NULL!	1	2	0	0	0
2	1	2	1	3	2	2	1	3	1	1	2	0	1	1	1	1	4	1	2	1	0	1	0	1	0	1	2	2	2	3	2	1	1	1	0	4
2	1	2	1	3	2	2	2	3	1	1	1	0	1	1	1	1	1	1	1	1	1	1	0	0	0	0	1	2	2	4	2	1	1	0	0	3
2	1	2	1	2	2	2	2	1	1	2	2	0	2	1	1	1	2	1	1	0	0	0	0	0	0	0	1	2	3	3	1	1	2	0	0	0
2	1	2	1	3	2	3	2	1	1	2	1	0	1	1	2	1	2	1	1	1	0	0	0	0	0	0	1	2	1	4	1	1	2	0	0	3
2	1	2	1	3	2	2	2	2	1	1	2	0	2	1	2	1	3	1	1	1	0	0	0	0	0	0	1	1	2	3	1	1	2	0	0	2
1	1	2	1	3	2	3	3	1	1	3	2	0	2	1	1	1	2	1	1	0	0	0	0	0	1	0	3	2	4	4	3	4	2	0	0	1
1	1	2	1	3	2	2	2	1	1	2	1	0	1	1	1	1	2	1	3	1	0	0	0	0	0	0	1	1	3	1	1	1	2	0	0	1
1	1	2	1	3	1	3	1	3	1	1	2	0	1	1	1	1	2	2	1	0	0	0	0	0	0	0	2	1	1	4	#NULL!	1	2	0	0	1
1	1	2	1	3	1	3	2	1	2	3	1	0	2	2	2	1	2	1	1	0	0	0	0	0	0	0	3	2	4	4	#NULL!	4	2	0	0	0
1	1	2	1	3	1	3	1	2	1	1	1	0	1	1	1	1	2	3	3	1	0	0	0	0	0	0	2	1	2	3	#NULL!	1	2	0	0	1
1	1	2	1	3	2	3	1	3	1	1	2	0	1	1	2	1	2	3	2	1	0	0	0	0	0	0	2	1	3	4	1	1	2	0	0	1
1	1	2	1	1	2	#NULL!	1	#NULL!	1	1	1	0	1	1	1	1	2	1	3	1	0	0	0	0	0	0	1	2	1	4	1	1	2	0	0	1
1	1	2	1	3	1	2	1	1	#NULL!	1	1	0	1	1	1	1	2	1	1	0	0	0	0	0	0	0	2	1	4	4	#NULL!	1	2	0	0	0
2	1	1	1	1	4	2	2	1	2	2	2	0	1	1	2	1	2	1	1	0	0	1	0	0	0	0	1	1	4	4	1	1	2	0	0	1
2	1	1	1	2	3	3	2	1	1	2	2	0	1	1	1	1	2	1	1	1	0	1	0	0	0	0	1	1	1	4	1	1	2	0	0	3
2	1	1	1	3	3	2	1	3	1	2	1	0	1	1	1	1	2	1	1	1	0	0	0	0	0	0	1	2	3	4	1	1	2	0	0	1
2	1	1	1	2	3	2	1	2	1	1	1	0	1	1	1	1	2	1	1	0	1	0	0	0	0	0	2	#NULL!	1	4	2	1	2	0	0	1
2	1	1	1	1	2	2	3	1	2	3	1	0	1	1	2	1	2	1	1	1	0	0	0	0	0	0	3	1	4	2	1	1	2	0	0	2
2	1	1	1	2	2	2	3	1	1	2	2	0	1	1	2	1	2	1	1	0	1	0	0	0	0	0	1	1	1	4	1	1	2	0	0	2
2	1	1	1	3	3	3	2	1	1	2	1	0	1	1	1	1	2	1	1	1	0	1	0	0	0	0	1	1	1	2	1	1	1	0	0	2
2	1	1	1	2	2	2	2	1	1	2	1	0	1	1	1	1	2	1	1	0	0	0	0	0	0	0	1	1	1	1	1	1	1	1	0	0
2	1	1	1	2	2	2	2	1	1	2	1	0	1	1	1	1	2	1	1	0	0	0	0	0	0	0	1	1	3	3	1	1	1	0	0	0
2	1	1	1	2	2	3	2	1	1	2	1	0	1	1	1	1	3	1	1	0	0	0	0	0	1	0	1	1	3	4	2	1	2	0	0	2
2	1	1	1	2	2	3	2	1	1	2	3	0	3	1	1	1	3	1	1	1	1	0	0	0	1	0	1	1	3	4	1	1	2	1	0	4
2	1	1	2	3	2	1	1	2	1	1	1	0	2	1	2	1	2	1	1	1	0	0	0	0	0	0	2	1	1	4	2	1	2	0	0	1
2	1	1	1	3	2	2	1	3	1	2	1	0	1	1	1	1	2	1	1	1	0	0	0	0	0	0	1	2	3	4	1	1	2	0	0	1
2	1	1	1	3	2	2	1	2	1	1	1	0	2	1	2	1	3	1	1	0	0	0	0	0	0	0	2	2	2	3	1	1	1	0	0	0
2	1	1	1	3	2	2	1	2	1	1	2	0	1	1	1	1	2	1	1	1	1	1	0	0	0	0	2	1	1	2	1	1	1	0	0	3
2	1	1	1	3	2	2	3	1	1	3	1	0	1	1	2	1	2	1	1	0	0	0	0	0	0	0	3	1	3	4	1	1	2	0	0	0
2	1	1	1	3	2	#NULL!	3	1	2	3	2	0	3	1	2	1	2	1	1	0	0	0	0	0	0	0	3	1	3	4	3	1	2	0	0	0
2	1	1	1	2	2	3	2	2	1	1	2	0	1	1	1	1	3	1	1	1	0	0	1	0	0	0	2	2	3	4	1	1	2	0	0	2
2	1	1	1	2	2	2	2	1	1	2	1	0	1	1	1	1	2	1	1	0	0	0	0	0	0	0	1	2	3	4	1	1	2	0	0	0
2	1	1	1	3	2	2	1	2	1	1	1	0	2	2	1	1	2	1	1	1	0	0	0	1	0	0	1	1	1	4	1	1	2	0	0	3
2	1	1	1	4	2	2	5	3	1	1	1	0	1	1	1	1	2	1	1	0	0	0	0	0	0	0	2	1	1	2	1	1	2	0	0	1
2	1	1	1	3	2	#NULL!	1	2	1	1	2	0	1	1	2	1	2	1	1	0	0	0	0	0	0	1	1	2	4	4	1	1	2	0	0	1
1	1	1	1	2	4	2	3	1	1	3	2	0	1	1	2	1	1	2	2	0	0	0	0	0	0	0	3	1	3	4	1	1	2	0	0	0
1	1	1	1	2	2	3	3	1	1	3	2	0	2	1	2	1	2	2	1	1	0	1	1	0	0	0	3	1	3	3	1	1	1	0	1	3
1	1	1	1	2	2	2	#NULL!	1	1	3	1	0	2	1	1	1	2	3	4	0	0	0	0	0	0	0	3	2	1	4	2	1	2	0	0	0
1	1	1	1	3	2	3	1	3	1	1	1	0	1	1	2	1	2	3	4	1	0	0	0	0	0	0	2	1	2	2	1	1	2	0	0	1
1	1	1	1	3	2	2	2	3	1	1	2	0	2	2	2	1	4	1	1	1	0	0	0	0	0	0	1	2	1	4	1	1	1	0	0	1
[truncated: 1 more rows]

## Sheet: Numerical meaning
Numerical meaning	Number
Predisposing factors
Gender
male	1
female	2
Age group (years)
60–64	1
65–69	2
70–74	3
75–79	4
≥80	5
Marital status
widowed	1
divorced/single	2
married	3
Nationality
Han nationality	1
ethnic minority	2
Education level
illiterate	1
primary education	2
secondary education	3
higher education	4
Number of children
0	1
1 or 2	2
3 or 4	3
5 or more	4
Living situation
living alone	1
living with spouse	2
living with children	3
Healthy lifestyle
Smoking
never	1
at times	2
often	3
quit	4
Drinking
never	1
at times	2
often	3
quit	4
Enabling factors
Healthcare insurance
for urban employees	1
for urban and town residents	2
NRCMS	3
at own expenses	4
at public expense	5
Pension income level (RMB)
0–999	1
1000–1999	2
2000+	3
Source of income
pension	1
work or savings	2
family	3
others	4
Location
city center	1
inner suburbs	2
outer suburbs	3
Need factors
Self-reported health status
good	1
normal	2
poor	3
Sensation disorders
no	0
yes	1
Feeling lonely
never	1
sometimes	2
always	3
Feeling nervous
never	1
sometimes	2
always	3
Life satisfaction
good	1
fair	2
poor	3
ADLs
independent	1
dependent for ≥1 activity	2
Physical health change
better	1
unchanged	2
worse	3
unstable	4
With chronic disease
no	0
yes	1
Number of chronic diseases/person
0	0
1	1
2	2
3	3
4 or more	4
Disease status
Hypertension
yes	1
no	0
Heart diseases
yes	1
no	0
Diabetes
yes	1
no	0
Cataract
yes	1
no	0
Cerebrovascular disease
yes	1
no	0
Bronchitis
yes	1
no	0
Gastroenteritis
yes	1
no	0
Contextual factors
Regional economic level
good	1
middle	2
poor	3
Outdoor activities
yes	1
no	0
Seeing children
every day	1
every week	2
every month	3
every year	4
<1 time/year	5
Neighbor contact
every week	1
every month	2
every year	3
almost never	4
Gathering with relatives
every week	1
every month	2
every year	3
almost never	4
Community activities
every week	1
every month	2
every year	3
almost never	4
Volunteer activities
yes	1
no	0
